# Supplementary material for: Expression Profiling Reveals Genes Involved in the Regulation of Wool Follicle Bulb Regression and Regeneration in Sheep
Source: Int J Mol Sci. 2015 Apr 23;16(5):9152–66. doi: 10.3390/ijms16059152 (PMC4463583; doi:10.3390/ijms16059152)
Supplement: Supplementary file 1 [file ijms-16-09152-s001.xlsx]

## Sheet: table S1
Table S1. All identified genes in wool follicle bulb during phase transformation.
Rank	Gene Symbol	Gene Expression (RPKM)
		Middle Anagen	Catagen	Late Telogen/Early Anagen
1	KRTAP3-1	112488	113352	94180.9
2	KRTAP8-1	56504.8	88107.9	102580
3	KRTAP3-3	41576.6	35861.9	30707.1
4	KRTAP11-1	33752.8	39855.9	29019.5
5	KRTAP7-1	26983.2	32520.8	29912.5
6	KRTAP1-1	25607.2	27718.6	23067.2
7	KRT34	27184	22684.6	20733.2
8	KRT31	17371	20075.3	16376.9
9	KRTAP13-1	21205.7	10454.5	17439.5
10	KRT83	12656.6	15698.3	12235
11	GPRC5D	10879	12978.5	10823.8
12	KRT33A	11095.7	11742.7	10361.9
13	PSORS1C2	11465.7	8247.41	7909.69
14	KRT31	8800.3	9221.73	7767.72
15	KRTAP3-2	10122.5	8470.09	6058.36
16	KRTAP9-2	9838.09	5712.64	5576.81
17	KRT81	5968.15	6383.19	4381.67
18	KRT86	5238.38	6463.96	4958.23
19	KRTAP15-1	4939.18	6043.12	5215.85
20	KRT85	4948.8	5949.22	3954.41
21	KRTAP9-2	6320.34	3126.92	3490.35
22	CST6	2762.95	4046.62	3039.33
23	LY6G6D	2624.89	2730.75	3191.5
24	PRR9	1685.86	2599.64	3298.64
25	RPS5	1918.48	2845.73	2377.09
26	TCHH	2297.16	1095.85	3744.93
27	LRRC15	2427.13	2340.93	1957.43
28	CHAC1	2173.84	1937.09	2505.09
29	RPS11	1973.03	2623.21	1891.48
30	KRTAP26-1	1693.01	2052.35	2628.85
31	RPS15	1572.58	2583.83	2179.2
32	RPLP0	1936.83	2465.65	1877.84
33	SFN	1765.98	2481.03	1911.11
34	KRT71	1429.97	1989.94	2650.1
35	KRT14	1191.45	2204.1	2489.06
36	HSPB1	1641.11	1657.93	1886.63
37	KRTAP12-2	1593.06	1675.16	1742.09
38	S100A2	1394.64	1994.79	1333.91
39	KRT5	1017.81	1492.33	2120.69
40	KRT25	1137.49	1034.62	2451.84
41	DUSP14	1694.55	1553.58	1320.06
42	UBA52	1166.95	1799.12	1511.15
43	VSIG8	1283.8	1641.97	1464.87
44	CST3	794.054	1688.3	1775.47
45	RPS18	1298.43	1567.34	1355.69
46	KRT17	653.001	1559.42	1697.52
47	KRT35	1608.1	1263.6	971.227
48	KRT27	829.393	1149.58	1730.95
49	KRTAP9-7	1536.43	964.157	1177.94
50	GNB2L1	1001.77	1259.24	1156.45
51	RPS8	873.72	1167.83	1141.7
52	KRTAP12-2	820.639	1138.36	1164.97
53	MT4	1051.04	1316.81	639.207
54	KRTAP16-1	1007.63	826.954	1138.74
55	RPL29	678.513	994.825	843.844
56	RPS17	609.687	1122.95	767.626
57	LGALS3	700.05	870.771	846.514
58	RPS9	618.109	944.052	791.476
59	KRTAP27-1	710.143	843.891	758.682
60	PABPC1	802.924	725.267	740.106
61	PPP1R2	791.609	778.336	653.077
62	RPL18	745.591	768.617	692.785
63	KRT39	926.818	563.058	673.383
64	KRTAP4-12	887.777	680.408	512.435
65	S100A3	541.799	758.016	752.72
66	FABP9	402.92	489.275	1120.41
67	KRTAP10-11	588.162	661.034	735.891
68	KRTAP4-7	773.839	710.199	479.821
69	RPL13A	542.046	804.601	564.807
70	EFHD1	613.389	761.971	531.969
71	KRT75	360.97	785.535	749.882
72	ASPRV1	481.813	754.756	609.275
73	RPL14	602.859	667.17	572.615
74	KRT38	718.766	521.907	581.901
75	RPL28	534.728	697.754	574.361
76	RPS3	551.509	660.895	581.17
77	JUP	480.667	720.439	583.381
78	RPS7	423.012	738.038	503.849
79	CDSN	353.046	539.965	751.516
80	MAP1LC3A	651.843	548.04	444.362
81	KRTAP10-8	409.272	594.421	623.148
82	RPL31	375.036	569.561	604.304
83	FOXN1	408.032	588.244	522.349
84	CRYAB	459.682	457.99	527.043
85	DNASE1L2	432.798	507.086	479.656
86	KRT72	406.164	410.849	581.359
87	CSDC2	411.167	552.232	433.721
88	TGM3	492.062	444.406	457.766
89	ACTG1	364.977	513.846	508.988
90	ATF4	522.005	417.834	441.089
91	SSR4	367.385	610.804	398.919
92	VIM	452.308	519.582	400.22
93	MIF	350.695	572.655	430.002
94	EMP1	382.516	466.423	448.242
95	CYSTM1	425.281	453.177	397.421
96	RPSA	391.814	517.916	364.449
97	DBI	383.352	517.866	372.258
98	TRIM29	356.472	503.337	399.962
99	POLR2L	388.204	444.067	364.554
100	RPLP2	420.753	407.093	353.548
101	RPL11	338.057	443.316	369.791
102	LAP3	445.264	294.134	397.95
103	PKP1	268.504	464.506	382.762
104	OAZ1	300.833	483.387	328.532
105	DSP	368.706	292.616	447.998
106	PKP3	279.093	469.571	345.545
107	SERBP1	430.386	291.556	370.226
108	C21H14orf2	291.135	427.385	338.762
109	KLK10	193.152	273.945	541.763
110	EIF5A	280.195	377.539	311.634
111	GSDMA	318.858	284.17	360.966
112	WDR83OS	260.531	413.114	284.756
113	KRT6A	237.162	329.378	383.938
114	FRMD8	394.813	157.729	359.921
115	EIF4A1	281.725	328.369	299.809
116	GJA1	335.872	251.932	310.157
117	ALDOA	276.714	355.376	263.73
118	RPS2	217.954	427.915	237.876
119	MGST3	248.055	400.158	220.632
120	TACSTD2	249.258	285.092	331.106
121	KRTAP10-12	243.411	319.644	297.593
122	SBSN	204.972	241.712	408.62
123	PLP2	271.861	297.796	275.627
124	CDKN1A	248.876	336.274	248.661
125	PSMD8	233.613	333.106	264.381
126	RPL23	239.695	309.728	261.811
127	RNF39	215.912	330.9	261.09
128	KRTAP17-1	240.473	299.691	266.222
129	CITED4	186.335	402.763	216.541
130	MLF2	200.915	359.143	237.837
131	DSG4	330.402	165.826	300.473
132	FAM46B	197.704	366.859	223.767
133	PLD3	269.031	283.84	228.326
134	C11H9orf16	195.318	321.08	252.26
135	KRT32	221.364	239.745	290.479
136	GABARAP	213.5	284.656	247.503
137	SLC40A1	269.418	210.913	246.262
138	CTSD	186.794	292.446	239.349
139	HEPHL1	314.807	174.834	228.55
140	RPL19	213.657	298.883	203.036
141	CTSL2	155.714	255.695	302.483
142	GSN	144.085	194.055	359.987
143	FAU	161.782	237.128	298.693
144	PRDX2	142.612	269.908	279.891
145	CSNK1D	243.026	237.877	208.548
146	EIF3K	202.33	297.054	189.72
147	DLX3	186.482	279.217	223.062
148	S100A16	151.504	305.008	230.998
149	TBC1D23	318.033	160.601	206.404
150	DAPL1	226.87	269.4	188.421
151	FABP4	182.859	343.608	149.576
152	KCNK7	210.608	286.193	177.262
153	RPL22	189.571	231.93	236.868
154	TSPO	177.996	271.544	205.521
155	ATP6V0E1	159.424	275.759	217.806
156	SPTSSB	229.787	247.711	174.43
157	RPL27	198.51	257.329	195.397
158	TXN	189.54	288.467	169.782
159	GABARAPL2	185.389	283.572	175.613
160	RPL24	187.82	275.418	175.322
161	CCT7	216.877	219.754	194.273
162	SH3BGRL3	150.682	254.4	221.645
163	JUNB	176.578	234.201	214.703
164	CSNK1E	203.771	187.901	222.073
165	BSG	188.186	226.569	192.347
166	HSPA5	235.628	132.233	237.541
167	GPX4	161.312	216.057	227.259
168	PPT2	202.452	215.293	184.57
169	ACTB	132.963	231.62	223.727
170	EIF2S2	206.375	161.03	215.852
171	ATP5D	173.485	225.08	182.988
172	RPL32	134.928	252.555	193.6
173	KRTAP24-1	148.427	164.485	267.246
174	CTSB	142.583	187.015	243.692
175	S100A14	118.918	252.791	197.062
176	CALML5	95.9053	209.492	249.444
177	RHOG	140.494	235.317	178.283
178	ENO1	175.587	216.757	157.465
179	MYL6	140.507	223.154	185.16
180	HS3ST6	142.648	195.355	210.722
181	PLK3	187.909	178.804	180.815
182	CD9	161.395	219.827	155.805
183	CLDN4	145.218	194.306	196.471
184	METAP2	207.849	134.15	193.292
185	EIF3I	154.624	218.447	154.516
186	SELENBP1	224.231	187.525	115.553
187	RPL37A	195.226	218.063	112.159
188	METRNL	135.537	221.75	165.66
189	YOD1	197.134	147.17	175.182
190	ANXA2	109.174	197.527	211.994
191	KRT80	147.877	180.368	187.034
192	HSPB8	173.277	166.406	174.326
193	HSPA8	211.627	152.464	148.852
194	ACTBL2	177.754	134.009	198.425
195	3-Mar	167.594	185.284	155.516
196	UQCRQ	141.468	210.751	155.185
197	CHCHD7	159.049	178.346	168.958
198	KRT84	85.8751	239.833	167.568
199	TUBA4A	164.1	172.05	156.128
200	RARRES2	152.004	195.217	138.243
201	CRCT1	106.077	211.026	163.851
202	PSENEN	136.868	183.146	156.714
203	ITM2B	151.458	146.869	167.764
204	ATP5B	158.343	168.41	139.215
205	NUPR1	147.067	127.088	191.785
206	NDUFA6	117.388	203.744	140.623
207	GPX2	109.852	163.339	188.269
208	NDUFB7	142.448	180.551	137.888
209	NCCRP1	111.663	199.555	149.283
210	MED30	143.781	188.16	127.501
211	HR	133.505	174.174	151.153
212	P4HB	155.66	151.569	148.422
213	EEF2	151.611	159.16	143.56
214	MSX2	172.237	150.892	130.451
215	KRTAP4-1	184.656	138.787	128.297
216	UCHL3	144.571	136.223	170.781
217	ATG9B	170.09	113.718	167.72
218	IER3	126.347	153.236	167.407
219	LPCAT3	123.517	175.529	145.337
220	ASL	111.331	162.548	167.434
221	PA2G4	142.819	163.426	131.679
222	BCAP31	130.933	172.506	134.174
223	FADS6	114.108	187.619	132.776
224	RPS10	148.823	204.64	80.9062
225	H2AFJ	125.799	165.267	140.713
226	SLC25A5	132.087	167.588	130.637
227	DPM3	139.522	149.417	139.823
228	CKB	111.955	188.291	128.026
229	ATPIF1	155.683	129.171	142.83
230	TPI1	131.157	147.383	149.026
231	ATP6V0D1	121.781	168.685	132.842
232	PLCD1	112.489	167.878	140.989
233	DUSP5	140.459	168.208	111.314
234	ZFP36	111.738	144.103	162.271
235	KRT23	90.2881	142.722	184.608
236	IVL	91.5288	82.6514	240.902
237	KRT26	134.78	87.2381	190.956
238	EMP2	119.064	157.054	136.623
239	IL1F10	106.878	162.039	143.619
240	GJB2	119.272	160.021	130.508
241	SERTAD1	111.249	144.431	151.889
242	ATOX1	101.552	172.654	128.357
243	CFL1	126.461	142.297	129.442
244	C21H15orf63	138.654	146.132	112.09
245	BAMBI	139.175	132.664	124.85
246	NDRG1	126.944	131.971	134.821
247	LAMP1	93.2549	178.741	120.277
248	KRTAP13-2	190.562	108.873	91.0283
249	H1F0	106.854	153.493	128.815
250	DSTN	109.299	148.36	129.968
251	UQCR11	119.974	155.99	111.515
252	OTOP2	121.484	126.244	138.103
253	CCDC64B	103.79	144.764	137.268
254	GRN	97.4833	163.996	123.337
255	RTN3	128.531	97.9004	155.677
256	UACA	176.303	57.0731	147.033
257	KRT28	127.825	101.972	149.216
258	KRT82	111.51	143.121	123.751
259	CARS	126.238	132.318	116.161
260	HIGD2A	108.527	142.818	122.442
261	PPL	86.6574	137.409	146.413
262	COX6A1	90.637	146.153	131.373
263	TMEM54	88.2022	145.504	133.004
264	ACADVL	118.472	129.119	118.683
265	NAPA	95.564	156.028	111.416
266	KRTCAP2	104.437	136.148	120.876
267	KLK7	95.6733	85.4899	179.152
268	CSDA	95.99	129.615	134.242
269	NDUFS5	114.705	153.784	90.9656
270	EIF3G	105.712	131.254	121.952
271	SPINT2	100.675	148.002	102.565
272	CHMP2A	117.171	105.087	127.549
273	FAM107B	142.753	107.169	97.7803
274	HSPA1A	142.592	90.8837	113.483
275	SLC1A5	98.0282	114.014	128.969
276	YPEL3	83.6194	123.015	134.106
277	TM4SF1	78.3613	106.614	152.645
278	SUN2	104.793	120.984	111.634
279	ABHD5	107.011	138.284	91.9124
280	RNASEK	109.093	117.35	110.687
281	EIF6	112.232	113.188	111.681
282	RPL13	106.654	123.136	103.571
283	COX8A	85.5357	119.361	127.311
284	RAB24	103.159	101.35	126.55
285	KRT40	102.384	112.572	115.593
286	LYPD3	94.7916	102.336	133.196
287	OST4	88.5952	127.09	112.907
288	FAM83G	86.976	134.254	106.14
289	SERINC2	108.536	114.862	102.713
290	FYN	109.049	114.292	101.52
291	CTNNB1	114.843	96.871	111.285
292	KRT36	125.023	87.4619	110.137
293	PDAP1	85.8375	114.852	120.941
294	GPNMB	119.693	121.44	80.2096
295	ELF5	108.95	111.316	98.1092
296	SRP14	98.4652	117.036	102.37
297	MRFAP1	93.03	106.915	117.79
298	TUBB4B	91.1882	119.065	106.806
299	MREG	98.66	118.522	99.7575
300	ATP6V1E1	102.465	100.497	113.311
301	EIF4G1	102.677	104.133	106.026
302	WIPI1	80.0806	132.613	99.5975
303	EIF3L	103.965	107.285	99.9262
304	FZD10	70.4761	130.971	109.547
305	VKORC1	91.4142	113.139	105.906
306	OTUB2	79.3304	133.839	97.1881
307	RBBP6	117.654	88.6661	102.333
308	ATP6V1G1	94.3717	106.959	106.058
309	SMPD1	89.8092	111.85	104.478
310	MFHAS1	76.4835	130.941	98.452
311	SDHB	95.7036	110.389	98.2589
312	EIF2B4	102.543	103.251	97.7422
313	SARS	94.5001	96.0224	108.965
314	SUCLG1	104.331	100.425	94.4149
315	HOXC13	100.831	105.267	93.018
316	ACTN4	84.3983	112.911	101.14
317	PLA2G2E	51.349	129.636	114.696
318	PLA2G4B	87.6522	99.2824	106.312
319	PPP1R15A	100.528	95.8812	96.4593
320	WDR26	99.2624	96.7575	96.7221
321	RAB2A	99.1385	105.378	88.0809
322	UQCRH	91.8634	107.79	91.6883
323	SNRNP25	80.5757	119.929	90.7047
324	MYEOV2	91.9319	110.385	87.573
325	CALR	100.167	92.0895	96.6768
326	EIF3H	102.805	91.967	93.6895
327	ALOX15B	122.393	92.1823	73.1767
328	KRT85	124.274	82.8809	79.3782
329	ATP5O	86.9669	120.142	79.2092
330	FGF22	76.5338	111.034	98.3416
331	PLEKHM2	70.6956	120.772	93.4878
332	TCP11L2	107.196	86.7059	88.4463
333	PPIB	85.6257	115.431	80.0792
334	NRBP1	87.0929	100.887	93.0486
335	KRTAP10-2	62.8713	104.891	110.934
336	SH3GL1	85.3747	104.382	88.8478
337	CSTB	55.1472	111.072	111.986
338	WDR45	98.6514	86.0758	92.8801
339	UQCR10	80.6066	123.738	72.9015
340	PSMB4	87.104	114.059	75.7646
341	TMBIM1	94.7418	97.8351	83.2419
342	DYNLRB1	82.3389	103.06	89.7546
343	HSD17B10	76.3749	106.679	91.6759
344	LYPLA2	89.5002	100.74	81.9954
345	BLMH	96.2645	80.9291	93.5485
346	AP2S1	79.7918	106.777	83.0502
347	EIF3CL	103.486	77.487	88.4822
348	STUB1	79.0731	107.939	82.4086
349	CSNK2B	102.12	86.1758	80.0395
350	PSMC2	89.8231	100.24	77.3739
351	VCP	82.8275	96.6194	86.4871
352	CTSH	57.7632	86.9474	121.037
353	LGALS7	75.0537	94.2	96.3641
354	RPLP1	84.193	105.68	75.1242
355	KRTAP10-11	50.4241	108.91	105.231
356	ALAS1	101.795	82.6625	79.7008
357	ALDH2	93.1952	98.2778	72.3689
358	RPS16	64.7752	119.668	77.7649
359	AP2M1	71.0132	111.796	77.4871
360	LY6G6C	75.4637	77.8997	105.832
361	MALL	76.057	93.5752	87.5043
362	TMEM147	70.6626	97.6846	86.3061
363	SFT2D2	80.9447	98.3008	74.4961
364	POLR2E	90.0606	85.0178	77.9502
365	RPS19BP1	75.1063	89.4379	87.5635
366	BOLA2B	78.2609	79.2049	93.2953
367	TMEM79	66.684	99.9199	83.3165
368	S100A11	36.9848	106.016	106.67
369	FAM26D	77.364	104.502	66.1685
370	ATG4B	61.3559	109.428	77.1329
371	PSMB1	72.9892	101.32	71.9454
372	PCBP1	61.733	86.2999	98.0476
373	SLC25A39	68.6505	96.586	80.0105
374	PSMB6	60.7011	107.704	76.7383
375	EPRS	114.23	44.6856	85.5691
376	SIDT2	82.4691	89.5856	72.1836
377	SDF2	71.738	107.226	65.0266
378	RAB3IP	89.7281	67.2169	86.1789
379	SYNGR2	81.7579	93.1003	67.9344
380	EIF5	94.9224	66.8184	80.7072
381	EIF2B5	84.8234	81.52	74.453
382	GGACT	51.9251	69.0804	117.423
383	ATP6V0B	77.5917	92.9326	67.5912
384	HSPA2	83.9065	61.8934	91.8792
385	NPC2	52.6171	86.7996	98.1459
386	PRSS53	66.3799	93.5149	77.2616
387	DERL1	79.0897	81.1353	76.8713
388	COX5A	89.5083	78.9117	68.5552
389	ORMDL1	72.6712	71.7222	90.9384
390	RPL8	61.7857	99.376	73.4437
391	ARF3	55.2222	97.961	80.7887
392	RAB25	60.7942	80.209	91.2349
393	TECR	76.6104	81.9254	73.512
394	PSMG4	52.2073	111.74	66.4452
395	ME1	87.8324	80.4411	60.9552
396	PSMC3	70.908	86.4722	71.4314
397	NME1	66.8359	95.0439	66.2981
398	SNRPD2	60.7622	96.2063	71.0821
399	ENDOD1	79.7513	76.0592	72.0799
400	RHOA	72.3195	75.7048	79.8079
401	TMBIM6	64.6187	81.3919	81.6153
402	SRSF5	110.663	53.5841	63.3455
403	CNDP2	58.6974	98.2315	69.8703
404	SEMA3F	64.5554	89.8552	72.3434
405	CALCOCO1	83.253	65.6321	74.8658
406	EFNA3	61.0388	70.5994	92.0299
407	RPS21	67.6474	121.48	34.0334
408	ZFAND6	73.7078	78.0084	70.9882
409	PSMB5	69.0689	80.5589	72.7816
410	ACPP	81.2135	76.8087	64.0307
411	EEF1D	65.8038	84.5805	71.5923
412	SPPL3	74.6822	75.6786	69.1045
413	CLN8	54.0852	90.461	74.7438
414	EIF3D	74.9527	71.5311	71.5688
415	RABAC1	56.3055	95.9739	65.0913
416	EDF1	68.3087	84.6223	64.271
417	CLDN1	66.2725	48.0069	102.432
418	SMDT1	58.8704	95.839	61.523
419	PSMB7	70.3653	84.2189	60.7815
420	LIMK2	54.9912	85.6846	74.0467
421	RNF11	68.9479	80.7192	64.8954
422	CDPF1	57.5853	96.3983	60.309
423	PRKAR1A	61.1583	95.1307	57.3818
424	TMEM11	64.9071	72.3333	75.8028
425	EMC4	66.5286	80.6639	65.3727
426	PSMD4	71.9926	67.4172	73.0688
427	HOPX	50.6569	84.6482	76.8139
428	ZRANB1	76.7965	72.0753	62.9812
429	MDH2	72.1927	84.9791	54.6068
430	TMSB10	45.3321	90.8628	75.4813
431	SLC20A2	66.6282	78.6675	66.1363
432	NDUFB10	66.5512	78.2135	66.416
433	EAF1	63.3529	89.4366	57.8831
434	PSMD2	74.2185	68.6272	67.6882
435	FAM83H	63.233	75.0907	71.8131
436	DNAJC7	86.9635	54.9457	68.1525
437	MKNK2	61.7463	81.6999	66.2169
438	HAGH	70.5571	66.719	67.9435
439	FOSL2	64.3328	70.2972	70.3837
440	PSMD3	54.4699	87.9921	62.3054
441	SSR2	63.4321	82.3237	58.6485
442	GYG1	69.8842	93.101	41.3583
443	CD164	54.9871	79.5658	69.7542
444	RNF19B	75.2179	70.2498	58.7954
445	TMOD3	82.2341	56.3398	65.0627
446	SLC25A3	74.1948	65.7543	63.5818
447	TMCO1	72.8424	74.6652	55.1842
448	BRP44L	64.478	81.7948	56.2504
449	BTF3	55.6516	66.0822	79.4889
450	PPP2R1B	77.5629	59.5492	63.7476
451	CNPPD1	67.3952	71.5744	61.5722
452	CCT3	66.0544	71.2872	62.6054
453	QARS	66.7962	71.3343	61.7877
454	EIF3A	77.1339	37.5718	84.3172
455	TIMM8B	69.4431	66.0694	62.9776
456	TRAK2	76.815	65.9036	55.3403
457	USP38	77.022	49.9484	70.8557
458	HADHA	79.1772	55.0963	63.0134
459	PPP1CB	60.3222	61.728	73.5065
460	GM2A	68.2658	69.2709	57.9912
461	EIF3J	72.6458	46.7238	76.032
462	AIM1	81.3335	46.6657	66.1651
463	PSMB3	50.6943	78.334	64.763
464	PENK	76.7994	73.7967	42.4696
465	ARL8B	67.4738	71.7068	53.845
466	CYC1	52.1268	86.9557	53.5281
467	MRPL41	50.5095	87.7141	53.9751
468	PIM1	59.969	74.6476	57.5255
469	AGPAT2	52.2498	76.659	61.8509
470	C13H20orf111	57.5327	65.8299	67.2829
471	S100A10	39.0939	77.6695	73.4445
472	NDUFA4	49.2964	88.2897	52.5107
473	OVOL1	51.3425	72.8066	65.1011
474	HMOX2	44.3498	87.8485	55.8859
475	LAPTM4A	54.4203	75.2889	58.1119
476	TEX264	43.6247	73.3078	70.8582
477	ASNA1	50.4841	78.3386	58.8173
478	UBXN1	55.9534	65.215	66.3742
479	NDUFA11	57.7774	79.2676	50.0371
480	CAPN12	66.1548	60.8623	59.6196
481	CNBP	60.5541	58.0206	67.8801
482	TUBB3	52.5298	62.2518	71.2836
483	GOLGA7	63.8726	58.0279	63.9957
484	TMEM62	66.1749	58.8428	60.6008
485	RBM3	56.0662	81.1385	47.8104
486	CTSZ	43.8305	70.0866	70.8588
487	TP53INP2	70.1525	51.0994	63.1039
488	UBE2R2	57.2816	67.0986	59.0054
489	ETFB	54.8482	63.632	64.5281
490	SERPINB5	70.3013	57.8115	53.9049
491	COX4I1	51.0319	74.8685	55.7502
492	ABHD2	54.4131	71.9789	55.1424
493	ABCF1	58.2431	61.2814	61.9457
494	UQCRC1	55.8138	72.3613	53.2864
495	MAP2K3	43.4313	75.6895	61.7659
496	MRP63	49.009	104.451	27.4067
497	JUND	51.013	74.2003	55.6173
498	CTSA	44.5005	61.6189	74.1003
499	RNF222	48.3741	70.8362	60.6695
500	WIPI2	48.5614	67.833	63.1244
501	RAB10	55.4351	60.9831	62.8043
502	PERP	51.6549	60.1002	66.9789
503	SULT1A1	52.6049	72.4593	53.4259
504	PRDX6	63.8703	63.1893	51.2365
505	LAMTOR2	55.0964	72.0536	50.7832
506	TXNL4A	50.9389	62.2552	63.514
507	CLTB	50.8376	64.0978	61.344
508	SERP1	36.9641	97.7707	40.8802
509	ID3	53.3223	61.1378	60.3704
510	CNPY4	64.8733	55.3416	54.5656
511	POLB	61.0736	60.2518	53.2827
512	LMNA	45.1394	62.8654	66.1276
513	GGH	53.9858	71.0026	48.776
514	TAGLN2	47.6583	65.0879	61.018
515	ACO2	52.3011	64.1164	57.2441
516	ELOVL3	46.3178	63.4883	63.3962
517	LMBR1L	45.4729	63.1316	64.5934
518	RALA	55.3905	64.9236	52.8352
519	COPE	51.3982	66.4179	55.2198
520	ORMDL2	44.7702	74.9275	53.2683
521	LPIN3	52.5438	59.8653	60.3181
522	TMOD3	70.4914	42.1333	58.7302
523	RB1CC1	69.8473	35.6268	65.6853
524	CYFIP2	64.1997	57.7709	49.1669
525	NDUFB9	51.7973	61.7205	56.5454
526	UBA1	51.6036	63.502	54.4804
527	SLCO5A1	62.4926	54.6478	52.0124
528	SPHK2	61.9165	55.4408	51.6811
529	SH3GL3	63.202	52.3721	53.2713
530	SPINK5	43.2084	31.4223	93.986
531	MED29	52.8842	66.707	48.7713
532	C7H19orf70	51.0994	67.9457	49.0489
533	DNAJB6	53.6524	56.1317	58.2911
534	PRELID1	42.7847	62.4497	62.7705
535	SAT1	47.6627	57.5238	62.6965
536	DAD1	46.6051	61.9764	58.9779
537	UCK2	53.1601	62.6982	51.4113
538	CLIC1	47.9045	65.1553	54.0449
539	KRT73	67.6737	44.0238	55.2875
540	RNF181	50.5639	62.0236	53.7275
541	FHOD3	61.202	50.1667	54.774
542	CA2	56.3611	59.4906	48.5237
543	DEDD2	48.3503	54.0705	61.8118
544	CCL27	30.035	42.8592	91.0675
545	BTBD1	47.1438	63.4266	53.2968
546	ZNF385A	45.7244	66.0857	51.459
547	PARM1	46.8564	65.9561	50.0568
548	SPRR4	38.6317	67.8695	56.2345
549	GSTP1	44.4378	62.9771	54.8805
550	CDKN2AIP	69.7506	43.371	48.8661
551	PSMC4	54.1515	55.3735	52.4066
552	GRHL1	59.4652	42.4432	59.9902
553	SCAND1	36.5664	73.1179	52.2062
554	RAB7A	44.8947	67.5683	48.9979
555	HEBP2	41.3466	59.3843	60.1306
556	PVRL2	44.193	61.8699	54.1154
557	LSM7	40.7444	62.4701	56.8121
558	PHPT1	54.9443	62.5208	42.3708
559	SAMD4B	49.7464	61.309	48.3912
560	LYPD5	31.0034	56.6459	71.5598
561	BUD31	58.5499	58.1372	42.2808
562	SDC1	42.9432	54.5746	61.431
563	FGF21	43.8177	42.4539	71.853
564	KIF1C	42.0539	63.1606	52.1748
565	TXNRD1	70.3792	39.5416	47.127
566	EZR	45.0155	47.5961	64.4184
567	LYG2	47.9858	50.1049	58.7424
568	TALDO1	49.2111	55.7957	51.5863
569	TIMM13	45.1082	59.3092	52.078
570	TAF10	37.4821	59.1807	59.5351
571	RBP4	43.7439	67.3762	44.9454
572	ENGASE	38.7858	66.2034	51.0607
573	ARF5	43.0651	62.145	50.7369
574	PPP2CA	48.309	48.8253	58.7353
575	NDUFS8	47.9456	55.9599	51.5732
576	WLS	68.5956	44.6989	41.8857
577	HSPA14	60.6811	48.4208	45.8095
578	RABGEF1	56.5534	33.5189	64.6436
579	SQSTM1	45.4231	51.2938	57.9973
580	KRTAP10-7	38.1116	59.0258	57.3395
581	BGN	46.7018	61.9836	45.438
582	DDX5	61.9909	31.8748	59.832
583	SLURP1	53.5091	53.502	46.5738
584	PIN1	42.885	58.4397	52.2397
585	MID1IP1	36.9873	56.7374	59.7797
586	KLC3	38.7249	59.7345	55.0257
587	EIF1AX	47.858	61.7331	43.4692
588	TRAPPC5	39.7102	66.2949	47.0152
589	EGR1	42.744	57.1978	52.5015
590	DDX39B	52.7443	46.0538	52.9787
591	IMPDH1	39.5597	71.198	40.568
592	EIF3B	39.2372	63.3001	48.6605
593	SPP1	30.798	40.6284	79.1411
594	JMY	54.839	45.2151	50.0999
595	C7H19orf24	44.55	48.4968	57.0055
596	C7H19orf43	40.6863	60.0258	48.9427
597	FAM43A	38.8943	61.2369	49.2867
598	NDUFS7	49.1768	55.4596	44.6036
599	APCDD1	39.7647	55.8851	53.5841
600	C3H1orf85	46.2738	52.5002	50.0687
601	TPRG1L	38.5262	60.8661	49.4248
602	FKBP8	37.0371	61.9181	49.5554
603	HSP90B1	63.042	30.6048	54.5382
604	COPG1	42.7277	59.8167	45.5329
605	ACTBP	35.7842	54.4928	57.6103
606	AMBN	40.4851	50.0268	57.3736
607	SSU72	47.5309	61.8189	38.5209
608	LGALS1	27.6753	77.5262	42.6471
609	YWHAB	52.7159	41.4196	53.3613
610	PGK1	50.9293	57.13	39.2412
611	KIAA0907	82.5871	26.5231	38.0006
612	GARS	43.6696	43.6129	59.8231
613	GPAA1	42.9478	59.8568	44.2455
614	DNAJB1	52.3946	54.3237	40.3229
615	RPS28	48.6883	60.7734	37.4333
616	PKM	36.97	60.7067	49.1686
617	C11H9orf169	54.6918	79.7475	12.1872
618	LYPD6	47.162	46.176	53.0686
619	TMEM189	39.7297	59.1181	47.4097
620	OTUD5	46.8386	50.5871	48.3843
621	TCHHL1	43.6986	18.8398	82.5129
622	NPC1	45.024	50.758	48.8436
623	RPL18A	43.0403	58.572	42.2389
624	TRIOBP	33.9937	52.0965	57.3437
625	AKTIP	49.4619	43.7216	50.1808
626	FAM129A	50.7321	40.3024	52.0763
627	PRADC1	40.2598	58.2199	44.3985
628	MCOLN1	39.0425	59.4765	43.8617
629	RNPEPL1	36.5036	59.1227	46.0384
630	KLF4	37.138	48.8893	55.6314
631	PSMD7	45.8214	43.9322	51.6884
632	SH3BP5	45.878	53.6058	41.9549
633	PTDSS1	42.0727	53.5596	45.7561
634	FIS1	45.3368	52.2998	43.7516
635	SLC25A37	49.8142	44.5188	46.8044
636	ANO10	50.1224	47.5872	43.2401
637	ANP32B	60.3759	26.4421	53.8883
638	CRABP2	26.6295	52.5562	61.217
639	NHP2	46.0937	46.9855	47.0959
640	TIMP3	36.9905	50.4847	52.4965
641	SIAH2	42.854	56.8698	40.2274
642	TARS	53.0984	35.1904	51.6444
643	CSNK1G2	37.1376	60.9099	41.6284
644	PROCR	38.8991	46.6871	53.8084
645	KRT6C	24.3657	62.4028	52.5991
646	AUP1	43.8669	52.333	43.1548
647	HYAL1	50.6994	51.9218	36.549
648	CAPG	39.2552	62.2412	37.4486
649	ZNF259	40.8519	55.4004	42.0965
650	NET1	50.8909	32.5926	54.7781
651	PSMA6	37.7856	47.2971	52.9813
652	LOR	38.6976	89.7047	9.2699
653	SLC3A2	39.592	44.3099	53.009
654	IP6K2	43.1597	38.8054	54.8318
655	TUFT1	53.3801	33.6417	49.4704
656	BTBD3	56.6436	34.47	45.2212
657	SNRPD3	40.4945	45.6068	50.139
658	UBL5	37.1707	46.5842	52.1452
659	CCT4	50.2538	43.5389	41.9136
660	HERPUD1	52.769	38.4341	44.1082
661	ETFA	46.9248	44.7001	43.0024
662	PSMB2	44.8548	51.9035	37.7362
663	SNRPB	40.7312	50.4571	43.1679
664	C5H12orf57	41.2323	52.7129	39.8645
665	CLK1	55.8802	30.5871	47.1126
666	TGM7	29.7535	40.1093	63.3513
667	MKNK1	47.1532	44.0281	41.3349
668	CTSF	33.0075	58.0183	41.1403
669	PFDN6	42.6169	45.1566	44.3022
670	PL-5283	36.8948	57.4896	37.5882
671	COPS6	41.6541	55.0169	35.125
672	ATP6AP1	38.4186	52.6766	40.4217
673	GMCL1	51.0984	33.6086	46.0802
674	KARS	46.2428	45.2506	39.2376
675	KIFC3	37.0153	46.6212	46.8577
676	NRG2	36.171	50.5744	43.6901
677	UBE2M	36.8495	54.0954	39.3157
678	ZNF576	47.4266	38.1216	44.6274
679	FBXW5	33.6955	54.0142	42.3246
680	ACTR1A	36.9132	47.4648	45.6074
681	CUTA	42.207	46.4658	41.0388
682	MEF2D	37.976	47.726	43.7878
683	EMC6	40.6132	43.6366	45.0241
684	XPOT	46.3434	40.0241	42.5962
685	KIAA0930	32.6539	54.6859	41.3545
686	MRPL14	35.6144	57.3185	35.6694
687	HBP1	47.5951	31.6865	49.2551
688	SDR16C5	36.2106	51.5903	40.5699
689	NDUFS2	38.7761	50.572	38.7626
690	GAMT	39.4775	50.399	38.1403
691	SLAIN2	42.317	41.1614	44.37
692	RAB5C	38.2672	47.3299	42.1048
693	ITFG3	33.1223	50.6514	43.921
694	CDH1	52.1545	27.1526	48.292
695	LAMTOR1	30.7667	54.1138	42.6658
696	NEDD8	44.518	44.6378	38.1836
697	ITPR2	45.8977	45.3288	35.9878
698	MFSD5	42.2442	46.3018	38.6095
699	TEX2	40.4631	40.7167	45.8937
700	GNAS	36.5495	44.5413	45.8305
701	PDLIM2	36.1046	47.4185	42.8202
702	FAM129B	27.4973	55.2913	43.3894
703	ROMO1	39.2311	51.7315	35.1454
704	RPL36	42.1987	47.1875	36.3269
705	PSMC5	42.5585	41.1352	41.9452
706	ASS1	38.3044	57.1773	30.0966
707	SLC35B1	39.1767	48.8219	37.5544
708	YIPF3	37.0797	48.8656	39.2346
709	FAM110A	32.7787	51.8424	40.2296
710	VAMP2	39.0946	45.0498	40.3817
711	MYH14	31.1784	44.5723	48.2495
712	CSDE1	46.6535	31.1818	46.0097
713	FOXO3	40.1405	44.2677	38.903
714	C11H2orf18	33.4598	54.5141	35.1359
715	BANF1	36.7762	41.2988	45.0233
716	PAIP2	39.0396	36.8631	47.0649
717	RANBP10	38.788	38.5109	45.6532
718	CDC34	33.8577	47.8762	41.1953
719	DCTN2	39.8969	45.5953	37.1823
720	LY6G6E	38.2592	32.9637	51.1537
721	OGDH	35.5397	46.7339	39.3457
722	C25H16orf72	38.7129	34.6653	48.1794
723	EIF2B2	39.0008	44.4702	37.7215
724	ZNF205	32.4226	47.7935	40.7278
725	FAM32A	32.371	40.645	47.712
726	KCTD5	38.8125	43.8537	37.9428
727	NDUFB6	35.8507	42.6021	41.9034
728	CRAT	31.66	46.5628	42.0754
729	ARPC2	34.145	50.9045	35.1886
730	PFN1	40.7086	37.0999	42.0697
731	DSG1	39.9119	23.9698	55.7631
732	MRPS26	34.9926	46.0642	38.4134
733	RAB11A	45.6865	31.269	42.0248
734	PREP	40.0746	34.5833	44.2326
735	MRPS33	37.1812	43.578	37.7992
736	HECTD1	49.7699	23.7126	44.8304
737	MAST4	48.3636	36.6762	33.1231
738	DDOST	36.1369	47.7413	34.2646
739	NME2	34.3424	49.3856	34.2305
740	CCDC104	42.4055	35.6193	39.7957
741	PFDN5	32.6608	45.1675	39.838
742	ATL2	46.581	31.0805	39.7249
743	EPCAM	31.4698	37.3264	48.2131
744	EIF3E	39.3015	39.1127	38.3941
745	ADRM1	33.6734	44.2962	38.6592
746	PRDM1	40.8748	34.3908	41.3078
747	NDUFA7	31.7838	44.6038	40.1648
748	MAL2	34.7691	39.3065	42.3627
749	OTUB1	37.2152	40.015	38.7942
750	SLC38A3	37.4312	37.7609	40.7737
751	PQLC2	30.1786	46.1894	39.4388
752	ECHS1	30.8206	46.4668	38.2912
753	ID2	49.8064	34.7668	30.9984
754	NDE1	39.8269	37.2727	38.3056
755	IFRD1	48.2777	27.0536	39.8909
756	TPM1	33.9746	23.0529	58.0363
757	RGL1	36.3952	38.823	39.6429
758	ATG2A	33.5282	37.9559	43.3629
759	NDUFA13	34.9061	45.6187	34.2402
760	RNF5	34.0637	46.782	33.8074
761	NIPAL3	41.4444	33.6323	39.2187
762	RNF10	31.1161	48.7607	34.4182
763	ZDHHC4	32.312	44.1118	37.8565
764	NDUFA8	33.9508	45.4837	34.8162
765	IDH3B	37.5802	38.903	37.6472
766	DIRC2	43.7147	32.7801	37.5348
767	HIPK3	45.401	27.1961	41.3931
768	SUCLA2	45.2172	30.3931	38.2724
769	PSMD6	39.3829	36.7681	37.5967
770	QSOX1	33.4574	46.08	34.1254
771	LAMP2	40.1708	39.0482	34.3793
772	TEX2	37.2907	41.2712	34.6927
773	IFI30	32.0518	48.9141	32.2179
774	GNB2	27.1295	41.9232	43.9473
775	RNF167	37.911	35.6235	39.4318
776	KDM5C	39.7728	36.9214	36.0833
777	RPS4Y1	36.7035	47.197	28.8508
778	MLLT4	36.1581	36.5651	40.0181
779	BAG6	34.3095	44.7178	33.672
780	CLPTM1	32.1925	47.8376	32.5873
781	TMEM259	28.6112	44.0712	39.9011
782	TCP1	34.4664	42.047	35.8952
783	15-Sep	33.9218	46.726	31.6266
784	PTMS	31.8822	31.3542	48.8889
785	MT2A	48.074	33.5615	30.4196
786	ENDOU	37.5341	33.8624	40.2275
787	WDTC1	29.5153	41.71	39.6127
788	NDUFV1	29.0944	50.4695	31.2324
789	TKT	34.7715	45.7377	30.0227
790	EIF1	34.7749	35.9609	39.7403
791	SLC25A37	41.3127	26.0839	42.9866
792	FIBP	32.9572	44.5896	31.7396
793	RAC1	31.6992	43.47	34.1008
794	PRDX5	25.1127	42.5175	41.4875
795	FAM104A	29.7354	40.3708	38.9618
796	GDPD3	23.6101	44.1646	41.2443
797	ATP6V1F	29.6919	43.676	35.5613
798	C7H19orf60	30.1414	42.4264	36.3472
799	RPL38	45.4431	41.6132	21.5766
800	MAFF	32.8073	42.0858	33.619
801	CCPG1	43.207	20.1184	45.03
802	TMEM50A	29.8035	44.0135	34.2324
803	SERINC5	42.6035	30.3511	35.078
804	TXN2	34.2535	38.511	35.058
805	SH3BP5L	36.5308	34.2345	37.0364
806	ALKBH7	26.7871	48.6433	32.2481
807	CHMP4B	35.6509	39.3117	32.6503
808	SEPX1	31.8888	39.9841	35.7096
809	RNF145	44.0071	27.1376	36.2582
810	SBDS	40.7377	26.8857	39.4767
811	SDR9C7	36.3993	33.4318	37.2161
812	RPL34	34.2185	42.419	29.9701
813	ERI1	35.6108	30.033	40.7284
814	CLTA	34.6514	36.33	35.2555
815	RAB6A	39.4496	28.9692	37.7222
816	GIPC1	32.4098	40.2511	33.4145
817	C13H20orf24	30.7471	55.6269	19.5601
818	RALY	28.0905	38.8513	38.9836
819	MDFI	38.1466	39.7326	27.6432
820	BLOC1S1	29.4739	33.9981	41.9378
821	HDLBP	31.9365	42.3464	30.979
822	MAPK3	23.3677	46.5624	35.325
823	CDC37	28.8569	42.9277	33.0994
824	TMEM86A	32.119	40.3194	32.3679
825	YWHAG	33.8316	34.8118	36.093
826	C2CD2L	32.6575	29.7406	41.9106
827	PTMA	35.854	27.1479	40.9629
828	GET4	23.2826	48.5048	32.0598
829	DOHH	29.3694	44.3015	29.994
830	LGALS7B	27.8535	47.1351	28.5432
831	HADHB	32.5358	39.046	31.9183
832	PSMA7	33.5073	36.8036	33.1699
833	CCT2	31.9132	36.2847	35.1699
834	GAPDH	26.2754	44.6075	32.4223
835	PDLIM7	27.0411	41.3783	34.7125
836	RASSF3	32.2378	31.6381	39.0202
837	RARG	29.465	39.0657	34.3255
838	GPC1	25.7911	44.3953	32.6119
839	LMAN2	32.0184	35.0251	35.6577
840	TOMM22	31.2432	37.3609	33.9201
841	CD81	27.8172	38.2324	36.3962
842	MICAL1	24.8823	34.4846	42.9731
843	RAB1B	27.9134	42.1478	32.1166
844	CHID1	28.6987	40.5498	32.8948
845	REPIN1	31.2692	35.2703	35.5641
846	TBC1D30	34.6256	34.6855	32.7741
847	FLII	29.7851	39.3097	32.8269
848	G6PD	24.232	43.9246	33.7403
849	PADI3	24.1407	42.0893	35.5779
850	C11H9orf78	29.6291	37.8464	34.2388
851	AQP3	22.5764	30.3381	48.6525
852	ACOT7	38.1593	31.0185	32.3142
853	CAMSAP3	25.836	33.5909	41.8997
854	CHMP1B	34.0159	37.4709	29.6856
855	SUPT4H1	36.5026	33.5813	30.6379
856	ZNF750	30.6552	33.4261	36.5179
857	WFS1	22.667	38.2255	39.6468
858	CCDC124	32.3489	37.6134	30.2167
859	ABHD17A	25.2485	43.3315	31.4174
860	BCL2L1	24.151	42.6765	33.128
861	ATP6V1B2	35.252	33.4932	30.7828
862	NDUFS4	25.185	45.1996	28.971
863	CLIC3	24.0953	37.694	37.2814
864	PCBP2	28.8668	34.9704	35.2107
865	CCT5	35.8433	28.954	34.073
866	MTCH1	26.4523	40.8572	31.5046
867	FAM167A	35.4341	31.2552	32.1074
868	MRPL52	33.9364	31.6684	33.1669
869	BMP4	33.1485	25.723	39.6948
870	MORF4L2	30.9572	32.1844	35.2583
871	BAIAP2L1	36.8619	31.4716	29.7977
872	TMEM208	30.8114	40.4181	26.6498
873	C19H17orf103	23.0588	34.8827	39.8872
874	AHCY	27.6878	39.5636	30.5012
875	WBP2	30.3604	37.0697	30.3008
876	RAB9A	26.6711	32.917	38.065
877	C10H14orf166	30.2678	38.5592	28.7963
878	SEC61A1	24.3708	41.9498	31.2956
879	C2CD2	27.5687	42.0825	27.9469
880	NDUFB11	29.0931	42.317	26.1192
881	ARHGDIA	32.2533	38.927	26.3352
882	CRNN	24.4731	23.0586	49.9175
883	MAPRE3	29.1236	38.6012	29.712
884	NAA10	31.1047	43.0466	23.2546
885	CYR61	51.9322	9.77582	35.406
886	KLK5	27.6688	33.0074	36.1182
887	PDCD4	41.4953	20.4241	34.8626
888	COMMD6	32.2305	27.8443	36.6482
889	PIGC	29.4184	34.6253	32.6337
890	SPINT1	30.3216	35.3376	30.7192
891	PARK7	30.0374	34.4174	31.6603
892	AKAP17A	29.2872	32.0477	34.535
893	GPS2	27.9711	34.0527	33.6746
894	GPT2	26.8356	33.5938	35.195
895	CTNNA1	40.0455	21.1881	34.3867
896	RNF180	35.286	26.8248	33.4738
897	KLHDC3	24.3036	38.2368	32.9295
898	LRP10	22.5924	37.9219	34.8401
899	OS9	32.9672	29.9625	32.4187
900	SLC22A23	22.1211	40.7572	32.4287
901	ERGIC3	32.1927	33.2667	29.7752
902	TRA2A	37.9891	25.4074	31.8157
903	BTG1	29.2324	30.3021	35.5832
904	BNIP3	26.7605	43.8236	24.5049
905	C26H10orf118	43.2314	9.42517	42.3728
906	C23H6orf132	25.5849	39.1492	30.2328
907	SORBS1	38.9274	23.389	32.6238
908	YIF1A	32.0347	31.4875	31.375
909	ZNF664	36.8548	22.6568	35.3734
910	ASPSCR1	24.675	34.3539	35.8443
911	KIAA1370	37.103	19.6158	37.9059
912	CYBRD1	38.7065	24.5521	31.2639
913	NKPD1	23.1599	38.3751	32.7601
914	PNPLA2	24.871	36.9825	32.384
915	BRK1	27.7284	35.7853	30.7126
916	CTNNA1	36.3995	22.0053	35.7632
917	AVPI1	20.7537	45.1057	28.2538
918	XBP1	26.4463	31.3775	36.2039
919	YWHAE	39.6111	24.8895	29.3924
920	GRPEL1	31.4218	30.3909	31.5986
921	PSMD1	31.7608	25.4142	36.0897
922	ARPC1A	23.284	38.074	31.8824
923	NSFL1C	32.0379	30.1937	30.989
924	CD63	27.6504	35.2053	30.0781
925	CDC42EP1	25.6444	26.8501	40.3987
926	ARPC5L	26.6011	34.7892	31.4396
927	POLR2I	26.8321	43.0549	22.9426
928	TMEM184B	24.1636	34.6218	34.0203
929	SRSF2	37.5676	24.5644	30.6698
930	KBTBD12	26.8482	37.4275	28.3527
931	TUBB2B	29.1511	36.3183	27.0142
932	RPL7A	30.5866	29.6082	32.1218
933	AIMP2	32.7178	33.4749	26.1145
934	VTI1B	23.6126	29.3209	39.3478
935	RBM8A	27.4948	33.7739	30.6847
936	CAST	39.0147	18.1127	34.7579
937	ARGLU1	43.371	19.6587	28.7925
938	MRPS34	25.4343	36.0303	30.2482
939	EIF4G2	33.539	24.7237	33.4352
940	RAB40C	20.7639	39.7805	31.0421
941	HTRA1	33.6039	30.0095	27.8943
942	FAM63A	29.4016	31.1252	30.9672
943	MIEN1	24.5831	34.7804	32.0227
944	EMC7	28.1334	30.11	33.0593
945	GOLGA2	31.8391	26.8466	32.1291
946	PITHD1	26.9069	40.4043	23.4606
947	GLTSCR2	19.9568	41.878	28.9321
948	HINFP	28.3333	29.6283	32.7686
949	DLX4	33.2663	30.0867	27.2589
950	MAFB	27.9641	33.1994	29.2727
951	DNAJB2	30.8896	29.02	30.2393
952	SPTBN2	23.0056	39.8002	27.1102
953	MPST	25.2423	35.4703	29.0047
954	KRT74	20.9806	27.9959	40.5842
955	YARS	26.7079	32.5113	30.2046
956	CD151	19.7155	35.3331	34.2689
957	APOE	28.1071	35.8276	25.1216
958	EIF2B3	28.5005	32.3022	28.2335
959	CARHSP1	25.6152	35.0625	28.3302
960	SLC35A4	27.42	33.9095	27.6468
961	PSMD13	27.4737	30.8907	30.5667
962	PPP2R4	23.6882	40.4881	24.5707
963	AURKAIP1	25.0798	33.5697	30.0333
964	IER2	22.0913	27.5391	38.9705
965	HMGA1	22.4746	37.9336	28.0859
966	CLK3	33.2514	24.6554	30.5729
967	TMEM184A	26.2876	31.0594	31.1186
968	SMAP1	28.1005	29.8169	30.4967
969	BBS4	35.1452	26.3476	26.7142
970	ATP5G3	29.2481	35.0597	23.6543
971	AHSA1	28.8647	29.1124	29.7058
972	PELI1	36.9868	21.4374	29.2458
973	CTDSP2	25.1791	34.8379	27.5371
974	RING1	25.7522	31.2603	30.5061
975	NUTF2	25.6235	34.8728	27.0071
976	AAMP	28.5919	31.2745	27.5649
977	YAP1	34.7036	24.3258	28.2061
978	PVRL4	27.132	25.3001	34.774
979	KATNA1	33.717	18.984	34.4203
980	MSX1	26.9774	31.6351	28.4431
981	SERPINA1	18.4766	30.5526	38.0215
982	MRPL21	26.6091	31.8673	28.5723
983	PQLC1	26.2493	35.3384	25.3636
984	PANK3	28.9338	25.6545	32.1781
985	DHX32	29.7204	30.5536	26.4186
986	ACAA1	26.8794	32.5581	27.2391
987	MMADHC	28.3574	34.3413	23.7692
988	WDR1	21.1529	36.4261	28.793
989	ZMAT2	29.8875	26.5887	29.8131
990	NDUFA10	26.2149	29.8347	30.1977
991	KPRP	24.7032	36.1118	25.0699
992	CDC42	29.2054	27.8463	28.7153
993	SPTAN1	30.3015	25.531	29.9214
994	MRPL17	25.165	37.5045	22.9973
995	SERPINB13	31.4925	26.5801	27.4755
996	AFAP1L2	30.1822	25.7489	29.2496
997	SLC25A11	26.2194	31.3977	27.4681
998	CNFN	16.1261	44.8138	24.074
999	NSMAF	34.0977	23.0634	27.6317
1000	TAGLN	14.4391	28.2685	42.0782
1001	RNFT1	31.2811	26.9581	26.544
1002	UBE2L3	25.3415	29.593	29.8405
1003	ADIPOR2	29.0683	30.848	24.6419
1004	ETF1	32.1401	24.8576	27.5048
1005	PLTP	26.1046	34.0349	23.8225
1006	RHOB	29.6619	24.3674	29.9165
1007	RNF25	26.4662	28.7423	28.5102
1008	FBXL5	27.046	27.0847	29.4202
1009	EPN1	23.5633	32.8998	26.967
1010	CNPY2	22.3449	33.2139	27.8708
1011	GPR115	31.5157	24.7732	26.97
1012	NUDT22	26.5768	31.0622	25.3673
1013	FUNDC2	26.8825	28.4085	27.6782
1014	PLB1	32.289	26.2986	24.2503
1015	RMND5A	31.8621	23.674	27.2904
1016	PTPN13	35.6855	13.8479	33.191
1017	DCTN1	26.2921	29.5752	26.8158
1018	STRN3	32.8153	19.1711	30.5818
1019	CPSF3L	24.8202	31.0668	26.6582
1020	MANF	25.3926	33.09	23.9637
1021	TOB1	24.809	28.9187	28.6926
1022	SEC61G	26.7164	38.2377	17.4288
1023	NDUFA4L2	31.8921	36.1431	14.2943
1024	ACAA2	27.7019	25.417	29.0811
1025	NDUFC2	25.5033	30.4584	26.1379
1026	DSC2	25.0274	24.0921	32.8374
1027	ATP6V1B1	18.2614	23.7279	39.7639
1028	CALM3	23.4126	30.0183	28.3192
1029	RMRP	7.32507	65.3416	9.02832
1030	MAF1	21.2511	32.723	27.674
1031	NDFIP2	28.5959	25.4916	27.5392
1032	GUK1	26.3743	29.7451	25.4284
1033	UPK3B	21.1665	36.4237	23.734
1034	ZNF583	34.1883	19.1581	27.9466
1035	SCD	34.8084	24.2922	22.1786
1036	SC5DL	26.9168	25.2169	29.0992
1037	FAM84A	18.9958	26.5985	35.6187
1038	CXXC5	21.0539	31.735	28.3523
1039	AARS	25.3663	27.3409	28.323
1040	HNRNPAB	26.0696	28.6267	26.2428
1041	TNFRSF6B	15.571	36.2236	28.9405
1042	REEP4	25.2269	29.9771	25.4759
1043	SP6	25.2196	31.0316	24.405
1044	LAD1	23.7408	32.2243	24.6237
1045	FYCO1	25.586	29.2215	25.7361
1046	CD44	34.7036	25.2108	20.5897
1047	FUS	23.3674	27.8433	29.1791
1048	FBL	24.0406	30.1003	26.1904
1049	CHMP1A	24.9691	30.1266	25.1791
1050	PPP2R1A	19.9103	29.7688	30.429
1051	BNIP3L	25.4103	23.6789	30.938
1052	POLR3K	26.5344	30.8868	22.6012
1053	PROM2	19.4252	32.5848	27.6998
1054	MIDN	18.234	27.1607	34.306
1055	POR	26.393	25.7385	27.4537
1056	GLTP	18.1592	30.5179	30.8849
1057	SLC25A20	22.752	34.9867	21.7784
1058	ARHGEF10	24.9227	26.7732	27.6616
1059	ST14	20.943	29.0584	29.336
1060	BAZ1A	27.4332	14.7529	37.1466
1061	RIN2	28.0082	24.1151	27.1669
1062	TSTD1	18.3526	33.5551	27.2613
1063	TSPAN31	22.3819	29.3869	27.3667
1064	OAT	20.7962	28.958	29.328
1065	TXNDC17	28.4941	33.161	17.4045
1066	TRAPPC1	21.7396	31.0662	25.9325
1067	NHP2L1	25.6845	31.3104	21.5669
1068	PPP1CA	20.9152	29.6898	27.8783
1069	FAM49A	26.1222	28.0995	23.9781
1070	TMED9	25.0744	28.3261	24.6166
1071	MRPL27	26.6909	27.504	23.8112
1072	VPS28	23.6062	23.7871	30.3387
1073	PAF1	30.4432	21.2646	25.9455
1074	TMEM115	23.6052	29.7294	24.19
1075	UBE2H	32.1723	19.6625	25.6362
1076	SULT2B1	20.8854	27.2685	29.1419
1077	PSMC1	21.0225	31.5454	24.5167
1078	PGLS	21.6151	32.1058	23.3475
1079	CDS1	25.9702	24.3296	26.7266
1080	KLK6	24.1587	22.7668	30.1009
1081	CLIC4	22.1183	19.1868	35.6743
1082	PDIA3	22.3837	24.5616	29.8574
1083	ELL2	30.1211	18.9737	27.5889
1084	PHB2	19.7668	31.9585	24.9319
1085	GDI1	22.8051	27.4292	26.4025
1086	CXADR	29.0167	22.6231	24.6315
1087	ARFRP1	25.2392	27.0238	23.8812
1088	NCOR2	21.0905	28.4188	26.5994
1089	IK	29.8413	15.5147	30.7491
1090	MAPK13	20.1315	30.6584	25.2509
1091	AKIRIN2	24.2854	27.334	24.3787
1092	C15H11orf94	24.7987	31.1339	19.9301
1093	MRPL20	23.9707	30.0844	21.7634
1094	UBE2V2	25.7121	22.9556	26.9637
1095	ATP5C1	21.0944	30.1186	24.4136
1096	CPEB2	27.1063	25.7473	22.6973
1097	CDC2L1	28.0529	21.6512	25.7738
1098	NFKBIB	21.6261	28.1801	25.497
1099	DDX17	32.9031	15.6924	26.6673
1100	LSR	23.7781	25.188	26.1719
1101	CLPP	24.719	25.8581	24.5114
1102	GTPBP2	24.1611	20.4995	30.4116
1103	UBAP1	22.3558	29.3114	23.3649
1104	C19H17orf89	23.2392	26.9439	24.7339
1105	GADD45A	25.9096	22.269	26.7164
1106	TOP1	33.5561	11.1657	30.0898
1107	XKRX	29.7076	19.2299	25.8586
1108	NPLOC4	19.3675	30.0655	25.3212
1109	SMPDL3B	23.1302	29.939	21.6101
1110	LRRC61	15.0793	28.6148	30.69
1111	CLTC	29.569	17.9468	26.8384
1112	USP5	22.196	32.02	19.8102
1113	COX17	24.7667	30.073	19.0727
1114	NUDC	23.9143	25.7276	24.1502
1115	IGFLR1	19.3735	18.111	36.2905
1116	AES	21.1079	25.87	26.5426
1117	RPN1	21.2815	30.8346	21.3501
1118	GPS1	19.892	30.406	23.0555
1119	UBE2K	26.7227	22.2094	24.2768
1120	FABP5	15.9004	26.5592	30.723
1121	TRABD	18.1056	32.1318	22.9171
1122	DDRGK1	24.6868	24.711	23.607
1123	NIPAL2	19.8304	27.9655	25.1958
1124	C23H6orf106	23.8576	25.3763	23.7083
1125	PDCD6IP	26.3094	18.7945	27.7188
1126	MYL12B	20.9006	22.8634	29.0013
1127	CKMT1B	25.7905	23.5303	23.4251
1128	CLDND1	23.9903	23.5736	25.0355
1129	TXNL1	18.2422	25.8357	28.5052
1130	HSP90AB1	31.3202	18.0207	23.2396
1131	MNF1	21.4265	28.2028	22.8727
1132	HIST2H2BE	32.2995	18.111	21.9671
1133	TMEM134	22.6728	30.0021	19.685
1134	EXOSC4	22.9347	28.2027	21.183
1135	PGP	19.2523	32.1726	20.8678
1136	PTBP1	19.3202	26.721	26.0298
1137	RPS6KB2	16.8715	33.9987	21.064
1138	PVRL1	20.5663	31.187	20.101
1139	TIMM17B	21.3428	30.3543	20.1384
1140	EWSR1	21.5139	19.5334	30.7224
1141	LENG8	26.3956	13.6681	31.6619
1142	UBE2D2	22.321	27.5282	21.8531
1143	TUBA1D	23.824	21.937	25.9107
1144	HDAC5	15.5714	26.962	29.1257
1145	THAP4	18.0006	34.5648	19.0936
1146	CDNF	30.1915	22.9921	18.4624
1147	WDR13	23.6494	24.3817	23.5952
1148	TXNDC5	17.7259	24.7344	29.0466
1149	PRKCH	19.7214	24.4723	27.1494
1150	MGP	13.8473	33.1165	24.3577
1151	RAB1A	22.1628	17.3628	31.7283
1152	LRRFIP1	29.2047	15.1649	26.7966
1153	WARS	18.967	27.7132	24.3513
1154	LDOC1	15.896	29.7388	25.3849
1155	RBM4	27.8018	21.1333	22.0566
1156	ARRDC1	16.8266	25.2868	28.8367
1157	FH	25.346	21.2777	24.1191
1158	ATG2A	20.5725	27.6972	22.3552
1159	NKD1	18.2943	28.8708	23.172
1160	IRF6	25.1389	19.5564	25.6277
1161	PSMA1	22.2642	27.1838	20.6833
1162	POLDIP2	20.6256	29.682	19.7653
1163	AK2	22.3431	25.4999	22.1293
1164	RC3H1	28.3116	18.8633	22.6526
1165	HSP90AA1	32.3077	13.6115	23.8516
1166	TGM6	24.7787	19.864	25.022
1167	APP	21.1181	16.9915	31.5165
1168	RER1	22.2371	26.1954	21.1589
1169	C15H11orf34	15.3778	13.5486	40.5921
1170	MVD	18.2821	28.7545	22.4503
1171	AHNAK	27.1569	17.5466	24.7331
1172	MRPL3	24.9737	28.2293	16.1949
1173	DAZAP2	23.3039	22.8766	23.2107
1174	PFDN1	20.7497	25.974	22.6585
1175	C18H16orf70	27.6364	19.0491	22.6276
1176	FKBPL	17.0496	30.2134	21.929
1177	ASNS	20.3325	20.9341	27.8918
1178	PPP1R13L	18.4686	26.0719	24.4667
1179	C6H4orf3	21.3879	27.137	20.4072
1180	OXR1	25.8832	16.3917	26.6449
1181	LIPM	20.5599	22.3779	25.9545
1182	ACP5	15.6865	29.904	23.1924
1183	PSMD14	25.5098	18.1772	24.9807
1184	TOM1	19.9595	26.5654	22.1416
1185	ATP5H	22.3264	20.414	25.9214
1186	FXYD6	14.3958	24.2406	29.9085
1187	ATG16L1	24.8086	21.6781	21.9849
1188	PLA2G2F	17.062	24.0856	27.3203
1189	NFE2L1	21.7263	20.0521	26.6559
1190	C29H11orf73	17.5816	30.3883	20.2399
1191	LEF1	29.221	17.1675	21.6037
1192	STK11	19.8352	24.2377	23.8499
1193	ASAP3	23.0989	20.4199	24.3705
1194	DHRS1	20.8396	26.4582	20.4285
1195	VAT1	12.5796	31.6222	23.4268
1196	COX7ALP1	14.7355	32.0689	20.7717
1197	IDI1	24.6872	15.2527	27.6109
1198	SLC48A1	19.92	26.2838	21.3239
1199	SLMAP	26.2787	16.2208	25
1200	CITED2	14.9893	19.8542	32.5708
1201	SF3B5	22.9014	28.7547	15.7199
1202	EMC3	19.1482	26.501	21.7054
1203	ATP5J	18.6143	24.065	24.2848
1204	NUCB1	21.3494	22.2966	23.2494
1205	BMP2	23.7302	18.2821	24.7538
1206	CDK9	15.8095	24.5446	26.3985
1207	HDAC10	19.3446	24.0798	23.3201
1208	PUF60	19.7885	24.066	22.808
1209	TOMM7	22.7377	27.2731	16.5302
1210	LSMD1	19.5398	27.527	19.376
1211	IPO7	27.3394	13.5239	25.4085
1212	NRARP	15.6143	23.2292	27.3766
1213	HSD17B8	21.7583	23.0919	21.2614
1214	DSC1	21.0389	10.3891	34.6809
1215	VAC14	16.3185	26.4674	23.2075
1216	CDKN1C	15.8149	40.2585	9.79764
1217	DEGS1	15.1869	22.67	27.9738
1218	PAK4	19.8164	23.7545	22.2428
1219	COX7A2L	19.0555	25.758	20.9789
1220	CBWD2	24.2982	19.5351	21.9439
1221	C3H2orf54	15.7092	18.7261	31.3353
1222	GPI	20.0847	25.3354	20.3424
1223	ATP2A2	24.9509	17.6177	23.093
1224	CEACAM19	20.9081	23.1502	21.5908
1225	DRAP1	21.6725	25.5918	18.3222
1226	DPM1	24.7013	21.6314	19.2385
1227	KLF5	25.9777	17.4687	22.0301
1228	TBC1D10A	18.8517	22.9352	23.6705
1229	ENAH	25.6504	16.901	22.7978
1230	BCAM	17.9992	26.2162	21.1324
1231	KCNK6	13.4283	33.4833	18.3003
1232	SREBF2	17.6763	24.9151	22.5405
1233	TPD52L2	19.5819	22.0817	23.3571
1234	ANKRD35	15.6294	24.7964	24.5424
1235	SDC2	14.8247	22.0663	27.9204
1236	OGT	28.402	8.47869	27.9109
1237	TUBB	18.9805	23.5653	22.226
1238	KRTAP13-1	29.9861	15.7366	19.0404
1239	SFXN5	19.7243	24.4895	20.4643
1240	IGFALS	20.6906	11.3776	32.5626
1241	SYTL1	19.455	25.6635	19.5008
1242	FKBP1A	19.6841	27.7956	17.1211
1243	BARX2	16.7627	17.7795	29.9742
1244	MPG	13.5588	27.5562	23.2435
1245	LIN7C	23.4723	19.3967	21.4781
1246	SRI	20.9053	23.5724	19.8432
1247	STARD5	12.1432	20.0495	32.1251
1248	MRPL11	26.6703	21.5289	15.915
1249	SUPT5H	22.2394	21.8255	20.0433
1250	COG1	21.3884	23.3772	19.2911
1251	ZNHIT1	21.8384	26.7365	15.3898
1252	EEF1G	18.7702	30.6985	14.4748
1253	UFC1	18.3458	25.7901	19.7437
1254	U2AF2	20.2842	23.7957	19.733
1255	DGAT2	16.6637	27.3097	19.831
1256	GOLGA7B	17.2617	22.7698	23.6752
1257	GOLGA4	29.8308	4.20042	29.5509
1258	APLP2	17.3041	18.9696	27.2792
1259	MRPL16	16.159	27.8639	19.4654
1260	IL13RA1	19.4218	19.7624	24.2817
1261	LMBRD1	21.1028	23.7072	18.6166
1262	SWI5	17.6046	20.9517	24.8663
1263	EFHD2	11.7391	24.2212	27.4363
1264	FBXO8	21.7111	21.1218	20.5381
1265	EIF4B	24.1994	19.0067	20.147
1266	SPTY2D1	18.476	12.217	32.5233
1267	SNRPC	22.8883	23.3501	16.8849
1268	PI4K2A	18.504	23.3732	21.1945
1269	GOT2	24.2066	20.8017	17.8877
1270	NDUFA9	20.2541	23.1828	19.4398
1271	PNPLA8	22.7167	15.1762	24.9798
1272	CNIH4	19.1633	22.8211	20.7869
1273	PPARD	13.1272	25.4852	24.0959
1274	LDHB	17.1507	30.3751	15.1611
1275	MLLT1	18.6313	22.615	21.321
1276	MEMO1	23.605	21.5173	17.394
1277	PIN4	20.7433	22.145	19.483
1278	PCSK1N	16.0204	26.7787	19.4607
1279	STAU1	18.6136	20.096	23.5365
1280	SELK	16.7079	22.4508	22.8574
1281	PPP4C	20.3768	16.321	25.3169
1282	PGAP2	23.5366	20.4523	18.016
1283	RPL3	17.4681	25.6905	18.6946
1284	PHF5A	19.5882	21.2016	20.9987
1285	GJB6	14.9541	24.8604	21.9713
1286	JAGN1	21.3843	21.9947	18.3756
1287	RAB11B	18.687	23.3821	19.6618
1288	ESRP2	21.9288	18.0343	21.6181
1289	LY6E	20.7904	24.7305	15.9218
1290	THOC5	22.193	19.393	19.8297
1291	CLEC16A	18.835	21.4746	20.9792
1292	VARS	16.705	25.9555	18.5697
1293	ANXA9	15.5234	19.8693	25.7981
1294	EIF4H	15.6595	20.435	25.0485
1295	UBXN6	14.2063	28.1839	18.6963
1296	MBD2	17.3205	21.3161	22.4308
1297	IL1RN	17.147	20.4775	23.4046
1298	KRTDAP	15.9928	28.1725	16.8491
1299	MOB2	13.5743	25.2083	22.1964
1300	BLVRB	15.4558	26.7148	18.7141
1301	DYNC1I2	19.739	16.1409	24.8974
1302	ULK1	16.3272	22.9195	21.4832
1303	WNT3	17.2726	20.347	22.9707
1304	EIF5B	27.5994	5.45831	27.5024
1305	DSC3	24.7861	16.7582	18.8271
1306	PEF1	17.2783	19.4029	23.6686
1307	CCDC25	22.4713	17.0541	20.7699
1308	IPO13	19.3453	21.6858	19.2594
1309	BAG3	22.4083	19.6507	18.1964
1310	USF2	16.2962	22.3599	21.5797
1311	PON2	22.8772	16.3355	20.9898
1312	NSMCE1	21.1789	21.9649	17.0326
1313	IDH3A	23.0243	14.5111	22.5204
1314	BZW2	19.9537	21.2665	18.6801
1315	ID1	17.4523	19.3182	23.0988
1316	TMEM41B	19.4804	20.0939	20.2835
1317	TMEM256	23.1129	23.3354	13.364
1318	CDC42BPG	17.0136	20.4998	22.2764
1319	GCN1L1	18.5748	21.1409	20.0197
1320	PSMD11	17.1209	22.5744	20.0335
1321	HYAL1	20.3438	19.0407	20.3371
1322	USP7	18.1881	18.4018	23.0943
1323	RUVBL1	20.8733	20.4587	18.3073
1324	CAPZB	18.4785	21.6114	19.5137
1325	TMEM223	17.9501	21.8517	19.7972
1326	TBRG1	21.3219	18.6889	19.5301
1327	EMC10	14.0612	22.9416	22.4362
1328	C1QBP	26.5451	21.3731	11.5004
1329	HMGCS1	20.7859	19.3533	19.2543
1330	TIMM50	18.2071	22.9305	18.2016
1331	SLIRP	19.9131	21.2684	18.106
1332	EMD	22.152	19.7928	17.3349
1333	EFNA1	17.631	17.9811	23.589
1334	SMPD3	19.5806	20.8047	18.6845
1335	TGM1	16.2791	17.6332	24.8875
1336	SNRPF	17.1821	22.6788	18.9263
1337	MYH9	18.6623	16.9709	23.1109
1338	CSNK1A1	21.2731	15.6082	21.8614
1339	ENTPD3	22.815	16.0544	19.8551
1340	TIMP2	14.6835	25.698	18.2807
1341	PRSS8	13.5125	17.7335	27.4057
1342	KPNA6	21.2682	15.8912	21.4105
1343	RARS	19.5118	17.7985	21.2447
1344	MRPL43	13.1447	23.4771	21.8946
1345	RPS14	16.7617	25.7906	15.9306
1346	ATF6B	20.0661	19.1102	19.2487
1347	CPQ	10.9102	18.5956	28.8941
1348	SH3GLB2	20.3518	17.673	20.2745
1349	SNRNP70	22.7063	16.0831	19.4949
1350	PPP1R13B	13.7159	22.57	21.8526
1351	ARF6	15.2714	23.4297	19.3507
1352	MICAL2	19.1276	19.4827	19.4376
1353	DNASE2	15.5562	22.7352	19.7187
1354	STIM1	19.2103	20.8596	17.8718
1355	CHCHD8	17.4316	23.8638	16.6377
1356	EIF1AD	19.7138	19.7154	18.477
1357	OAZ2	18.052	22.4442	17.3742
1358	PIGU	19.7382	17.8705	20.2392
1359	SLC30A1	21.8292	15.5355	20.3897
1360	ZDHHC12	16.2648	21.619	19.845
1361	KCMF1	16.7125	19.3798	21.6002
1362	VAMP8	17.2359	26.3524	14.1035
1363	ACTN1	12.4038	20.232	25.0157
1364	ACTR1B	17.0948	20.8778	19.6266
1365	PDZRN3	16.7814	13.1954	27.5425
1366	KCTD4	18.7641	20.9887	17.6315
1367	BCAS4	10.6392	25.7357	21.0043
1368	CREB3L1	16.8832	23.593	16.8661
1369	DCTN3	17.3914	24.0209	15.8911
1370	PTPRA	23.7662	13.5983	19.9168
1371	ANKRD39	15.884	25.1538	16.2369
1372	TNK2	15.7835	18.2323	23.226
1373	MIR1843	28.9123	22.9747	5.29471
1374	TRPC4AP	15.2926	21.9598	19.9202
1375	RAB5A	16.6103	20.1248	20.4195
1376	STRA13	13.0848	25.8394	18.1936
1377	BLZF1	21.6895	16.1855	19.2176
1378	TM7SF2	12.4944	20.1009	24.4786
1379	C1H21orf33	12.635	25.5303	18.9073
1380	KCTD11	17.5597	18.9029	20.5731
1381	SHB	14.3071	23.4599	19.1906
1382	LEPROTL1	18.7042	18.1037	20.1354
1383	KIF5B	22.3545	7.89825	26.6899
1384	ANKRD13A	16.3285	19.1874	21.3779
1385	ATP6V1D	19.4792	18.7028	18.6839
1386	SPCS2	16.2345	21.5493	19.0736
1387	YBX1	14.6659	21.9016	20.2784
1388	CIB1	18.5283	21.6536	16.5757
1389	SS18	21.7931	15.8485	19.1075
1390	ITGB5	15.9174	22.3516	18.3022
1391	BTG3	18.2368	20.1746	18.1429
1392	DGCR6	14.7942	24.2501	17.453
1393	STC2	0.382366	1.05496	55.0371
1394	ZGPAT	14.4695	22.7351	19.2601
1395	SHKBP1	15.1864	21.5048	19.7516
1396	GABRP	14.2818	14.0323	28.0373
1397	BAG5	15.6366	19.5608	21.0675
1398	CAPZA1	18.2763	16.2112	21.7344
1399	ACSBG1	16.0181	13.8779	26.2401
1400	BMP7	13.3863	27.0026	15.6212
1401	MAPK6	22.5344	12.8375	20.6358
1402	DCTN6	17.9888	18.8315	19.1441
1403	PPP2R2A	18.5209	16.9462	20.495
1404	EFNB2	18.9393	13.0647	23.8813
1405	COX5B	20.3262	23.8445	11.6555
1406	DDR1	14.2154	19.3983	22.058
1407	APOA1BP	17.5152	21.1446	16.9976
1408	GGCT	18.2753	18.0073	19.2764
1409	JAK1	22.8355	13.6324	19.0184
1410	UBE2E1	16.635	21.7396	17.0941
1411	SERINC3	22.0117	14.9291	18.4854
1412	TOX4	20.4908	15.3971	19.5044
1413	GAS2L1	14.5381	23.6401	17.167
1414	MRPL37	19.2968	24.1138	11.9228
1415	BICD2	16.892	17.0337	21.3645
1416	CDKN2AIPNL	17.0582	20.2093	17.995
1417	YKT6	16.3354	25.2349	13.6409
1418	MPDU1	18.8872	18.5182	17.7978
1419	TRPV3	21.2074	16.5321	17.4374
1420	VIMP	17.0179	18.556	19.5599
1421	ING1	19.2078	18.5758	17.3468
1422	SMARCA4	17.676	17.4979	19.9518
1423	SLC44A1	18.8049	16.8216	19.4815
1424	CEBPG	16.6357	17.7297	20.7335
1425	PTPRF	16.1796	21.132	17.7781
1426	YME1L1	19.5934	16.7456	18.6702
1427	BAHD1	15.1128	19.3877	20.5071
1428	ANKRD11	18.1345	14.0389	22.8241
1429	C11H2orf28	15.4725	22.6161	16.8784
1430	COMMD9	19.2808	22.6318	12.8717
1431	COPZ1	14.2879	23.1968	17.2786
1432	STXBP2	14.128	21.0748	19.509
1433	AKR1A1	14.2959	24.7312	15.6732
1434	C10H15orf62	15.6088	18.5423	20.5241
1435	STARD10	17.1408	20.9579	16.4574
1436	BRP44	17.2565	21.4662	15.7295
1437	NRD1	19.0992	13.7753	21.5596
1438	MIR146B	22.5525	6.07216	25.785
1439	HNRNPL	18.4656	18.7897	17.0919
1440	ALDH3A2	18.1394	17.8122	18.3646
1441	MARS	17.42	16.623	20.1909
1442	RBM42	15.9753	19.8379	18.3625
1443	BTBD9	17.3419	21.8937	14.8284
1444	GRIN1	14.9476	23.374	15.7397
1445	CDK2AP2	16.8365	17.5351	19.6142
1446	ADI1	15.6257	21.5034	16.782
1447	SCAMP3	15.8845	21.2887	16.7147
1448	RAF1	14.9796	22.2048	16.6062
1449	NPDC1	15.1595	22.462	16.0891
1450	MYO5B	16.5886	18.1497	18.9479
1451	ADCK5	17.7312	17.3126	18.6395
1452	RALBP1	16.7752	18.0289	18.8698
1453	TMEM40	14.6463	21.0458	17.9307
1454	DBNDD2	16.8079	17.8385	18.9617
1455	CMIP	13.3231	21.3716	18.8486
1456	TJP1	17.6649	17.1979	18.5833
1457	CADM4	14.9974	22.6252	15.8013
1458	SON	23.1293	10.3813	19.8812
1459	PSMA5	15.4958	18.5964	19.2638
1460	RORA	18.0441	15.0335	20.2564
1461	VPS25	18.9953	15.5127	18.7171
1462	GAN	18.6228	19.0605	15.4783
1463	STOML2	17.9404	18.7278	16.4928
1464	COPB2	20.9308	14.798	17.3975
1465	KRT16	10.9103	20.6111	21.6001
1466	C17H12orf52	16.661	19.6062	16.845
1467	CANX	19.7747	12.7561	20.5584
1468	HOMER2	15.064	22.0623	15.9556
1469	SZRD1	16.1863	18.6076	18.2753
1470	HMOX1	12.2275	18.5843	22.226
1471	CCDC85C	12.9964	25.0114	15.0039
1472	STX12	16.6922	18.2083	18.1003
1473	AP1M2	15.8453	21.2279	15.9233
1474	RNF185	18.1058	17.9336	16.8795
1475	ANKRD13C	15.3883	16.5201	21.0055
1476	CASP14	9.97345	23.4452	19.4424
1477	UBAP2	15.25	18.5244	19.0774
1478	TEAD3	13.3297	19.5005	19.9707
1479	GTF2E2	17.0369	18.7241	17.0315
1480	NDEL1	19.9357	14.317	18.5388
1481	SCAMP2	19.0331	18.0966	15.5491
1482	MYL6B	14.7637	18.8115	19.0955
1483	FAM134A	14.3415	19.4146	18.9142
1484	NOP16	14.4006	21.7773	16.4837
1485	LZTS2	14.3562	17.307	20.9959
1486	IMP3	12.3981	20.7639	19.3358
1487	GTPBP1	14.9412	19.3228	18.2195
1488	GSK3B	20.3135	18.5655	13.5213
1489	TOMM5	16.2661	19.4072	16.6568
1490	SMARCD2	16.8944	17.0688	18.301
1491	CHD7	20.4591	14.1153	17.6893
1492	UBFD1	14.8536	18.8909	18.5006
1493	SRPR	16.5198	16.1239	19.5277
1494	RAB27B	17.6489	15.1652	19.3427
1495	CAMK2N1	14.9756	19.9878	17.1325
1496	GNG10	15.3347	20.9554	15.7984
1497	REXO2	15.138	17.3456	19.5845
1498	CORO1B	13.049	18.7925	20.1607
1499	DGKA	22.2915	12.2149	17.3531
1500	DDX54	14.2949	22.5507	15.0094
1501	SIK1	11.482	19.1558	21.1616
1502	RYK	15.8595	20.5438	15.3584
1503	MAP7D1	12.7642	18.0933	20.8081
1504	MVB12A	12.7449	23.2146	15.652
1505	TFG	16.17	12.7165	22.7109
1506	FASN	17.0458	19.4024	15.143
1507	RBM39	18.6313	11.1905	21.7573
1508	CD99L2	17.6568	16.5795	17.3067
1509	TMEM9B	12.8362	22.2072	16.4435
1510	CHD4	17.1819	15.2434	19.0108
1511	SLC39A8	10.7519	15.4096	25.2729
1512	SPNS1	15.079	19.2487	17.0485
1513	ALG14	17.0341	19.5379	14.7821
1514	MFSD6	19.7044	11.7202	19.9177
1515	NT5DC2	17.206	17.3727	16.754
1516	BOK	14.865	20.2709	16.1748
1517	PPM1D	18.7269	13.5357	18.9701
1518	ZNF710	13.6686	20.042	17.5163
1519	SDF2L1	9.62906	24.9842	16.5759
1520	ITPKC	11.7895	17.4962	21.8366
1521	RBM10	14.2503	18.1155	18.7459
1522	UFD1L	13.642	22.2125	15.2297
1523	YIF1B	12.562	24.8602	13.6519
1524	PRPF4B	24.4635	9.56173	16.9597
1525	SLC25A1	11.3918	21.9345	17.6545
1526	USP2	15.0506	17.0577	18.8523
1527	KRT15	14.8323	22.972	13.1369
1528	GNB1	12.7095	18.6406	19.5666
1529	HNRNPH1	20.9607	9.70946	20.1967
1530	PDZK1	13.1435	12.4366	25.266
1531	PAFAH1B1	18.2169	15.8612	16.7623
1532	DNM2	14.2892	16.0236	20.4945
1533	EHD1	12.6297	20.4169	17.7176
1534	ERI1	18.0098	14.958	17.7831
1535	RTN3	17.7576	14.0757	18.9095
1536	TNFRSF12A	14.6529	14.5239	21.5011
1537	CIRBP	17.5515	15.4815	17.6374
1538	CYB5R3	11.6264	20.3275	18.7112
1539	ARHGAP32	16.7856	18.2691	15.593
1540	C5H12orf44	14.0403	20.1229	16.4579
1541	MLEC	20.622	15.9216	14.0561
1542	HNRNPU	19.0603	11.5347	19.9746
1543	INPP5A	12.9922	22.0042	15.5711
1544	FKBP4	15.9302	18.078	16.5016
1545	DSG3	20.7408	13.2468	16.4898
1546	TRAPPC4	15.7313	18.3821	16.3525
1547	RPL4	16.3363	18.1433	15.9805
1548	MFN2	16.9218	17.9829	15.5453
1549	TUBA1B	19.0126	13.7417	17.6567
1550	KRT6B	11.967	20.8339	17.6032
1551	KIAA0368	20.7721	13.2648	16.3376
1552	SSSCA1	12.969	21.5134	15.89
1553	NFE2L3	13.7377	15.142	21.4369
1554	ADIPOR1	12.038	21.1416	17.1257
1555	FAM83C	14.9868	13.1505	22.166
1556	MED21	16.8106	17.4085	15.9923
1557	OSTF1	16.4719	17.8339	15.9053
1558	RPS12	12.1429	24.949	13.1063
1559	UQCRB	15.4472	17.4586	17.2826
1560	SLC9A3R1	11.0828	23.6505	15.4511
1561	HSD17B14	10.8352	24.8293	14.411
1562	ELAC2	13.602	21.4939	14.9654
1563	ABHD12	13.801	17.4247	18.809
1564	DMKN	14.1853	18.5038	17.2547
1565	MRPS12	16.4095	18.1147	15.2391
1566	PLAGL2	17.9337	14.6385	17.1834
1567	CSRP1	10.0828	20.0475	19.6157
1568	MRPS2	12.5342	20.2571	16.9158
1569	VASN	13.1384	17.3719	19.1498
1570	PPME1	17.8163	19.1781	12.6191
1571	TRIP12	19.7785	12.5493	17.2541
1572	TOLLIP	11.4839	20.2935	17.7154
1573	DDB1	17.9083	16.1503	15.3621
1574	TTC1	14.1824	13.294	21.9332
1575	DEGS2	6.50939	24.3231	18.5668
1576	GPX3	9.62004	14.8998	24.8693
1577	ARL2	16.0107	20.4032	12.9573
1578	CYTH2	16.5315	16.824	15.8335
1579	C3H1orf123	16.0598	17.6443	15.4553
1580	CHCHD2	14.612	18.0092	16.5054
1581	CDC42EP3	17.8269	15.9106	15.3843
1582	HIP1R	12.0201	14.8721	22.1785
1583	ARHGEF10L	14.0317	18.0222	17.0043
1584	HARS	18.2301	14.0757	16.7474
1585	MAEA	14.2902	17.3485	17.3918
1586	IMPAD1	15.7179	16.3899	16.9105
1587	CNOT1	20.5397	12.5034	15.9728
1588	ATP13A2	11.6673	19.5636	17.7515
1589	ARHGAP23	13.8936	16.0989	18.9748
1590	DEFB	10.7029	23.6245	14.57
1591	FHL2	12.9745	21.1439	14.7419
1592	PALMD	14.742	12.1668	21.8754
1593	HSPA9	17.8733	12.4416	18.4368
1594	OSTC	14.3288	20.6097	13.7526
1595	TMED10	14.7093	17.0384	16.8469
1596	USP16	21.8268	6.67591	20.0334
1597	GNL1	15.2293	17.2702	15.9997
1598	MVK	13.4471	21.5653	13.4782
1599	SNAP29	9.71574	21.6985	16.9784
1600	ERP29	18.5636	15.5325	14.2812
1601	STT3A	16.7443	17.404	14.2268
1602	COA3	15.7191	15.1797	17.464
1603	UGCG	15.9663	13.9057	18.4335
1604	ABCD1	13.3634	19.7004	15.221
1605	CUL3	19.3775	10.7195	18.1804
1606	THEG	13.9592	19.7362	14.515
1607	XG	18.1853	12.8833	17.0645
1608	MBD3	13.7056	19.0894	15.2665
1609	MAP2K2	10.8244	19.5701	17.6453
1610	LAS1L	18.8339	12.6174	16.5769
1611	AHCYL2	20.5437	15.2099	12.2235
1612	SLC27A4	12.0478	19.9153	15.9357
1613	GADD45B	15.4463	13.5367	18.887
1614	U2AF1	16.5881	14.8612	16.3993
1615	COX11	12.2189	18.1603	17.4692
1616	TMEM258	13.6385	21.1104	13.0966
1617	SSNA1	12.4776	22.1568	13.1952
1618	RAB38	14.9877	17.7135	15.0431
1619	SIRT2	15.3522	17.9311	14.4382
1620	ZBTB7B	15.0293	17.0938	15.5673
1621	GNMT	11.4221	21.3083	14.8687
1622	MRPS25	14.0099	14.1377	19.4504
1623	TMEM14C	13.5771	21.6407	12.3642
1624	HIATL1	21.8436	11.963	13.7647
1625	BTBD9	13.6152	19.7674	14.175
1626	DHCR7	14.5228	17.6388	15.3848
1627	CYHR1	12.7643	17.5308	17.2276
1628	CHCHD3	17.6637	17.2004	12.646
1629	UBAC1	13.73	17.5646	16.2062
1630	CDYL	14.3625	18.5911	14.4693
1631	MKRN1	13.8661	15.1732	18.3554
1632	GBA2	14.5587	16.3268	16.4555
1633	MAL	16.2595	18.3673	12.709
1634	HDAC1	18.2607	15.1813	13.8554
1635	CNN2	9.87096	18.1808	19.2267
1636	ANKHD1	20.9063	9.46257	16.9042
1637	MRPL24	11.4161	18.9759	16.8077
1638	INO80B	11.404	16.9654	18.7919
1639	ABHD14B	12.7653	19.8925	14.4896
1640	HDAC3	16.1047	18.254	12.7723
1641	PADI1	8.72226	14.3096	24.0306
1642	COPS5	15.8346	16.1725	15.0544
1643	ASCC2	11.6525	21.6303	13.7438
1644	RSRC2	18.1956	7.93756	20.8916
1645	TPR	22.0051	4.58177	20.4161
1646	SERF2	9.82517	21.8632	15.2672
1647	HCAR3	16.1811	16.4962	14.2428
1648	HNRNPD	15.1896	13.6308	18.031
1649	PLK2	13.672	16.7892	16.3789
1650	ZBTB7A	11.8658	14.5683	20.3425
1651	C1H3orf52	20.1913	13.9759	12.6019
1652	NDUFS6	12.8307	18.5221	15.4136
1653	UBE2J2	12.4181	16.8539	17.3941
1654	CLPTM1L	12.7232	19.6827	14.221
1655	MT1E	15.8267	25.2374	5.49248
1656	WASL	16.0691	14.2553	16.1868
1657	AJUBA	9.87895	14.2337	22.3899
1658	LAMTOR5	16.1628	14.7106	15.6242
1659	WDR83	15.1032	15.4733	15.8014
1660	RAB3GAP2	19.5732	11.8878	14.8987
1661	GSK3B	16.1957	18.1258	12
1662	ARL4A	14.8007	16.1498	15.2666
1663	EIF2B1	19.0698	12.031	15.1032
1664	BOLA1	11.5624	18.7662	15.862
1665	PTRH1	15.9451	16.9203	13.2906
1666	VMP1	14.3751	16.5892	15.1401
1667	AP1B1	13.6135	17.0356	15.4474
1668	CHMP3	15.9699	15.4124	14.698
1669	FMO2	12.2126	15.4051	18.4428
1670	HM13	14.9754	16.2167	14.7658
1671	UBE2O	12.7412	16.5462	16.6468
1672	SRRM2	16.56	11.8711	17.4906
1673	ACLY	13.6061	16.2068	15.8739
1674	NDUFB5	11.3756	21.5168	12.7196
1675	INSIG1	15.0765	12.9729	17.4776
1676	GTF2H5	14.7205	17.8876	12.8887
1677	MPRIP	13.9068	14.7049	16.884
1678	FNBP1	17.0971	11.6216	16.7262
1679	THRA	13.7431	19.1294	12.5667
1680	PGD	13.2939	15.2822	16.8578
1681	FKBP3	17.747	13.8531	13.7688
1682	CCNJ	18.5873	14.8667	11.8928
1683	TRIAP1	13.618	19.8711	11.8536
1684	CTTNBP2NL	16.3548	10.7017	18.2814
1685	GCHFR	10.9401	19.5567	14.8333
1686	TMEM229B	10.4335	15.5001	19.3629
1687	RNF149	16.1691	13.9925	15.0779
1688	SEC13	14.291	15.2693	15.6585
1689	SRSF6	14.4033	12.8367	17.9269
1690	PPAP2C	12.4557	17.3051	15.3455
1691	PSMA3	14.859	14.2618	15.9767
1692	HES2	10.8869	17.1966	16.932
1693	CDC26	14.2899	17.094	13.4729
1694	STK25	12.8092	18.9625	13.0816
1695	DDX24	17.1657	12.4069	15.1791
1696	PAFAH1B3	9.82665	15.8699	18.906
1697	ATP6V0A1	15.8907	16.0457	12.6586
1698	ACSL3	17.8708	11.1863	15.4845
1699	ARID3A	12.9899	15.9939	15.5479
1700	HNRNPM	15.3182	11.2306	17.9185
1701	MAFG	14.8847	14.2724	15.2358
1702	TTC38	14.8345	18.5978	10.9429
1703	C4H7orf55	9.58863	21.4517	13.301
1704	CHFR	12.9471	16.7026	14.6502
1705	ELOF1	12.9814	16.1864	15.1248
1706	COX7A2	13.3359	22.7069	8.21811
1707	ATP6AP2	17.064	12.6089	14.5861
1708	ERBB3	13.8026	12.179	18.2754
1709	RNF40	13.3216	15.8746	15.0291
1710	CALD1	13.8827	7.76526	22.5758
1711	IMMT	17.0523	13.1431	14.0263
1712	SEPHS2	13.8792	16.3499	13.9386
1713	PICALM	14.0238	12.1254	18.0161
1714	EVPL	12.3935	11.69	20.068
1715	LAMTOR4	16.3275	16.1944	11.5435
1716	FIP1L1	17.1605	13.3097	13.5896
1717	SUPT6H	15.0697	13.1919	15.7321
1718	TSPAN2	16.8627	13.226	13.8797
1719	ZNF706	14.6428	15.8559	13.4655
1720	TMEM160	17.8915	23.1237	2.9233
1721	CSTA	6.5456	18.5877	18.7668
1722	PEPD	12.6852	17.5042	13.6821
1723	LGALSL	13.0442	17.0244	13.7958
1724	CERS4	9.18219	20.6561	14.0076
1725	RANGAP1	13.9426	14.9027	14.9762
1726	PTDSS2	13.4783	14.8736	15.4392
1727	USP22	11.216	17.4612	15.0501
1728	TOB2	12.7021	13.1809	17.7646
1729	ENSA	15.0897	14.2494	14.2746
1730	CHMP5	14.688	14.0618	14.7663
1731	PRAF2	16.3977	14.1202	12.8911
1732	PTOV1	10.9921	16.4244	15.9893
1733	EGLN3	14.7251	14.6117	14.0673
1734	GPANK1	13.3225	15.0895	14.9516
1735	NAA20	14.6565	15.1856	13.5051
1736	ETFDH	16.6378	12.9276	13.7668
1737	HERPUD2	15.81	14.5128	12.9074
1738	PTPN3	17.4542	13.3285	12.3142
1739	SH3GLB1	13.9698	14.8901	14.1629
1740	LBH	13.4355	15.8062	13.7797
1741	AP3S2	14.4623	13.6865	14.8713
1742	VAMP3	12.0134	15.1505	15.8362
1743	C16H1orf116	13.8055	14.4814	14.6848
1744	TMCO3	10.7951	15.9934	16.1526
1745	SORT1	12.5214	12.7445	17.6665
1746	TCF7	11.595	14.7741	16.5169
1747	PINK1	10.0928	19.7417	13.0425
1748	7-Sep	15.539	7.41399	19.9223
1749	SPSB3	13.6562	14.8053	14.3663
1750	VPS51	11.6608	16.706	14.4531
1751	ATP9B	13.1084	13.2816	16.4027
1752	SMTN	8.02032	15.2	19.5586
1753	PTGR1	11.1853	15.4706	16.0985
1754	GDE1	12.3959	15.6318	14.7061
1755	RPS6KB1	13.4393	10.9458	18.3115
1756	PEX19	11.1729	17.1979	14.2774
1757	ZNF185	11.907	16.9023	13.8328
1758	ZDHHC6	14.6937	13.155	14.7032
1759	TAX1BP1	16.39	7.30214	18.8425
1760	RNF170	14.6995	13.0657	14.6719
1761	PPP1R37	11.5833	17.4936	13.3539
1762	RNPS1	13.8441	12.547	15.9977
1763	GMPPA	10.9252	13.0068	18.3824
1764	ELP5	13.0239	16.3375	12.9518
1765	TSSC1	9.96213	19.2953	12.9453
1766	SNX2	14.6593	13.3317	14.2038
1767	FAM213B	13.0939	18.2206	10.8279
1768	GRTP1	14.9695	14.1425	13.0248
1769	HDGF	12.7244	15.4649	13.9432
1770	SLC6A14	11.6484	11.0126	19.4604
1771	PMEL	20.5758	11.3884	10.1309
1772	RPL37	13.7178	19.45	8.90945
1773	ATP13A1	11.8606	17.3048	12.9113
1774	AHNAK2	12.2025	15.8311	14.0153
1775	PSMD13	14.1555	15.0617	12.8212
1776	ASB1	10.0359	17.9162	14.0792
1777	MPP1	13.7012	17.6306	10.6884
1778	TUFM	12.6021	15.4978	13.9201
1779	APBB1	12.5985	15.1421	14.2561
1780	CCNL2	15.0507	11.2052	15.7037
1781	IMPDH2	14.0147	14.6815	13.2424
1782	PFDN2	15.8016	10.1791	15.9169
1783	NDUFS3	13.7026	15.3843	12.7691
1784	MORN4	14.7607	16.0217	11.0513
1785	XPO7	18.0542	10.8682	12.8909
1786	BPIFC	14.457	13.3765	13.7952
1787	C13H20orf27	12.518	16.7633	12.3467
1788	MRPS18C	11.7918	20.4624	9.34914
1789	RAB11FIP4	12.6561	12.2803	16.6226
1790	ETHE1	10.0234	17.1934	14.3204
1791	WBP1	10.3761	14.8133	16.3133
1792	DOLK	13.4115	14.0284	14.0229
1793	FAM210B	14.1522	13.8758	13.3599
1794	NAGA	11.6446	15.0413	14.7017
1795	LUC7L	15.1133	9.38892	16.8619
1796	ATG4A	13.6116	13.1876	14.5644
1797	NELFE	13.518	16.8493	10.9618
1798	SCPEP1	15.1656	14.0959	12.0444
1799	EMC2	14.1864	11.8566	15.2524
1800	MLLT11	13.3239	14.9551	12.9466
1801	BTBD2	12.112	17.1743	11.9073
1802	COPS3	13.4811	15.3881	12.3178
1803	SLC7A5	11.1267	16.4862	13.5677
1804	GLTPD1	10.1697	13.9424	17.0646
1805	DARS	13.8433	13.8052	13.5084
1806	MAPK1	11.6615	17.109	12.3858
1807	SYTL2	16.1783	7.24279	17.7215
1808	PGRMC1	12.2921	12.1587	16.622
1809	KSR1	11.6619	16.2811	13.0717
1810	PIM3	10.3179	14.705	15.9496
1811	NADK	12.6893	14.6923	13.5692
1812	RPL36AL	13.3503	14.6718	12.9215
1813	EBP	13.5648	14.0932	13.2692
1814	TEC	16.1262	9.34687	15.4283
1815	ACVR1	9.66577	10.3927	20.8203
1816	STEAP1	14.5421	13.8788	12.4167
1817	SMAD7	12.7504	12.5161	15.4731
1818	RNF41	14.0723	12.6552	13.977
1819	USP32	17.1015	11.0709	12.5278
1820	FLOT1	12.181	15.7135	12.7945
1821	MOSPD1	11.2315	11.6376	17.8065
1822	MRPS21	11.5176	16.5079	12.6264
1823	H2AFX	8.30995	14.9	17.4347
1824	ANXA4	12.2521	14.3979	13.9624
1825	DDT	9.00779	19.5739	12.0137
1826	TTLL12	7.62314	19.5166	13.4035
1827	HDDC2	15.763	15.6744	9.05822
1828	RC3H1	17.0544	8.64053	14.7673
1829	KIAA0284	8.6554	17.3139	14.4734
1830	RHOT2	11.4906	13.0255	15.7992
1831	MRPL40	8.30475	15.9693	15.9516
1832	MYO18A	11.5902	13.1376	15.415
1833	REPS1	14.5393	11.4085	14.1396
1834	MAN2B1	12.0791	14.3533	13.6236
1835	SH3KBP1	13.943	11.7308	14.371
1836	SRP19	9.56004	13.7509	16.6723
1837	NUDCD3	10.3887	16.1712	13.4139
1838	PITPNA	11.6795	14.9756	13.2453
1839	BCAS3	14.2031	13.1236	12.5564
1840	ZDHHC5	11.1575	14.0693	14.5729
1841	SNRK	14.4002	12.4944	12.8334
1842	GRB2	11.4627	15.3366	12.9044
1843	DLST	12.8799	14.835	11.9871
1844	CHTOP	14.0061	11.3266	14.318
1845	COMMD1	13.8073	11.4656	14.339
1846	CSTB	9.61162	15.2431	14.7429
1847	NAB2	12.7955	13.5469	13.2447
1848	HYAL2	11.6989	14.3253	13.5413
1849	DYNC1H1	11.2614	14.2526	14.0457
1850	CETN2	12.4785	16.1966	10.8383
1851	FAM96B	11.7823	13.6749	14.0412
1852	PUM2	15.2887	9.1336	15.0712
1853	STK17A	14.3691	10.5764	14.5477
1854	PFKL	8.882	17.7251	12.8397
1855	MINPP1	12.9995	15.7758	10.6461
1856	NCSTN	13.2226	14.4966	11.6593
1857	4-Sep	12.8391	10.9101	15.6261
1858	MRPL34	11.755	15.1326	12.471
1859	RAB11FIP5	9.99186	17.5407	11.7937
1860	SQLE	10.7984	15.1107	13.3767
1861	TMEM30A	12.7879	12.6511	13.8422
1862	TCEAL4	16.0937	7.57991	15.5934
1863	TBL1X	10.6819	15.2975	13.267
1864	UNC45A	12.7068	12.4881	14.0061
1865	GNAI3	13.7407	10.3653	15.0857
1866	BRE	12.1573	15.871	11.1425
1867	TMEM205	11.0976	14.6531	13.3977
1868	LPHN2	13.8745	9.29164	15.9616
1869	C8H9orf72	13.9797	13.168	11.9648
1870	RAB5B	12.4728	12.4297	14.2062
1871	DUSP2	10.7432	13.437	14.9155
1872	VPS29	12.0224	14.983	12.0781
1873	NOB1	13.9422	11.7804	13.3326
1874	PCDH1	8.96398	14.5455	15.4807
1875	ATG3	13.1667	11.7037	14.0948
1876	NOLC1	17.02	10.0213	11.8421
1877	VAPA	11.8796	12.6125	14.3431
1878	PPAP2A	13.1198	13.8432	11.8404
1879	KTN1	15.1267	3.44825	20.2153
1880	BLVRA	12.3627	15.3223	11.0784
1881	KLC1	11.4871	13.7314	13.5187
1882	BTBD6	9.88803	15.252	13.5807
1883	RIOK3	14.3069	10.6826	13.7189
1884	PNN	18.2299	4.8209	15.6379
1885	PDZD11	11.821	14.2175	12.6448
1886	TRAP1	14.2736	11.9182	12.4733
1887	KDSR	12.5991	11.8201	14.2352
1888	ZNF75D	13.0518	12.1128	13.4807
1889	KCTD20	14.8447	12.2668	11.5338
1890	HSBP1	10.9793	15.0354	12.6202
1891	UBC	13.3825	12.4589	12.7259
1892	DYNC1LI2	14.0948	10.1948	14.2544
1893	SMU1	12.4702	11.3662	14.7026
1894	TRIM59	14.5907	11.4931	12.4077
1895	ARFIP2	11.5899	14.7095	12.1822
1896	EFNA4	11.7181	12.102	14.6436
1897	SRSF11	14.3166	4.87793	19.2661
1898	CSNK2A1	12.6777	10.3583	15.4089
1899	GNL3L	14.7911	12.4906	11.0756
1900	TMEM66	12.8877	11.9695	13.4815
1901	FBRS	12.4009	13.304	12.6051
1902	TBCA	11.6367	14.7026	11.9307
1903	STX6	10.172	12.6905	15.3839
1904	NOTCH1	13.6313	11.8491	12.7462
1905	MAPKAPK3	10.3036	13.9258	13.9861
1906	TBC1D17	11.0715	14.5689	12.569
1907	DNAJC3	11.5987	8.69157	17.9161
1908	SPINK4	3.94788	7.39268	26.8442
1909	MRPL10	9.56135	17.0379	11.5674
1910	TMED4	12.6854	11.9809	13.4721
1911	EIF4EBP3	16.8926	9.8982	11.3271
1912	MYO6	15.4097	7.91983	14.7869
1913	AP2A1	9.37588	14.2982	14.4389
1914	RAPGEFL1	12.343	12.0041	13.7331
1915	GIGYF2	16.7234	8.45233	12.8966
1916	SPG7	10.7978	14.9592	12.2979
1917	VPS4B	14.14	11.2176	12.5608
1918	CPT2	13.3393	11.6444	12.9106
1919	PES1	12.6399	13.0768	12.143
1920	SIVA1	5.58204	15.3342	16.9133
1921	EPHA1	11.3067	10.9107	15.5607
1922	MRTO4	13.0806	14.3804	10.3019
1923	HSPH1	18.4072	7.16082	12.169
1924	SPAG7	13.7412	10.5335	13.3934
1925	ALKBH4	6.32078	15.591	15.7543
1926	REEP5	13.5935	11.1425	12.8942
1927	NANS	10.8382	13.7667	13.0208
1928	EPHB3	8.92619	12.2169	16.4261
1929	ACAD9	11.1643	14.3114	12.0248
1930	NPTN	13.3487	11.9521	12.1854
1931	RQCD1	12.1058	11.6068	13.7453
1932	BZW1	12.0414	11.9501	13.4558
1933	CYFIP1	14.2001	10.7762	12.4487
1934	RPL30	13.1382	13.8838	10.3436
1935	SNAPC2	11.626	12.9083	12.8252
1936	RSL1D1	14.1589	11.0369	12.1485
1937	CPT1A	14.8541	11.3241	11.1489
1938	SLC5A8	12.1663	13.6941	11.4643
1939	COX14	11.7105	14.8276	10.7407
1940	ANAPC2	8.76069	14.508	13.9905
1941	PTPN13	15.8632	6.15328	15.2329
1942	SLC39A1	10.6712	12.6075	13.968
1943	FAM173A	9.66776	20.151	7.41145
1944	PACSIN3	6.65504	12.8984	17.6666
1945	SYPL1	9.7696	15.1004	12.35
1946	ARFGAP2	11.3423	13.9957	11.8793
1947	LARS	14.255	9.12566	13.8336
1948	IDH2	12.7396	13.8996	10.5446
1949	GRSF1	12.1156	14.1495	10.9143
1950	AP1S1	10.1635	14.9683	11.9971
1951	RBM27	12.1079	7.36279	17.6443
1952	SYAP1	12.5287	10.5769	13.9713
1953	IL27RA	10.8987	12.7702	13.3924
1954	PRSS27	10.1719	9.70934	17.1702
1955	EXPH5	18.0247	5.95673	13.0425
1956	SHMT2	12.0326	12.1244	12.8656
1957	CISD2	11.3685	11.0656	14.5738
1958	RPTN	16.1792	4.22721	16.5125
1959	ATP6V1C1	12.9212	11.7025	12.2937
1960	ARRDC3	11.3131	10.7735	14.8222
1961	DAPK3	9.71755	12.8886	14.2959
1962	NDUFB2	11.1656	14.5415	11.1635
1963	BCKDHA	8.05393	14.9819	13.8194
1964	PSPH	4.86103	6.60763	25.384
1965	HRAS	6.74501	17.9602	12.1234
1966	COPA	12.9002	11.0287	12.8786
1967	CCNI	8.93101	12.7332	15.0863
1968	DBNL	10.0289	12.9491	13.7425
1969	DMPK	11.4877	12.5479	12.6643
1970	HMGCL	12.9722	12.8744	10.8389
1971	GLRX3	9.52866	15.5302	11.5977
1972	KDM5B	12.311	11.7617	12.5578
1973	TRIM28	10.5295	12.5501	13.55
1974	ABRACL	9.83124	15.3983	11.3942
1975	BCL2L13	10.6252	13.9439	12.0223
1976	MAT2A	11.3825	12.1515	13.008
1977	ABTB2	11.44	12.966	12.1302
1978	LSM4	11.4264	12.4587	12.5847
1979	KAT5	11.1552	15.3065	9.97364
1980	GSPT1	13.6475	11.0638	11.6317
1981	LSM12	12.1869	11.9456	12.2077
1982	MRPL13	12.5846	14.7525	8.91294
1983	ZFPL1	11.6867	12.0411	12.5211
1984	FBXO38	16.6881	8.78237	10.7363
1985	USP6NL	12.7685	11.0592	12.3589
1986	SEC11C	10.0519	9.36316	16.7416
1987	C16H1orf95	9.75171	14.3778	12.021
1988	PDHB	10.7566	10.6407	14.7529
1989	ILF2	13.3243	11.2404	11.5461
1990	SNX3	9.98912	9.8839	16.2133
1991	PDIA4	11.4996	10.6278	13.9236
1992	TRPS1	16.4476	7.29269	12.301
1993	KANK1	11.1642	9.22914	15.6251
1994	UQCRFS1	10.8001	15.3446	9.8651
1995	THAP11	10.2907	14.3793	11.3254
1996	UBTD1	9.9591	13.3767	12.6413
1997	TLCD1	9.60593	15.1291	11.2394
[truncated: 11,901 more rows]

## Sheet: table S2
Table S2. Differentially expressed genes in the wool follicle bulb during middle anagen-catagen transformation.
Gene Symbol	Gene expression (RPKM)		P-Value	Log2FoldChange	Regulation Direction	Rank
	Middle Anagen	Catagen
KRTAP13-1	21205.7	10454.5	0.0058612	1.02034	Down	9
KRTAP9-2	6320.34	3126.92	0.00975558	1.01526	Down	21
CST3	794.054	1688.3	0.00222286	-1.08827	Up	44
KRT17	653.001	1559.42	0.00505823	-1.25585	Up	46
FRMD8	394.813	157.729	0.000992281	1.32372	Down	114
RPS2	217.954	427.915	0.00442568	-0.9733	Up	118
CITED4	186.335	402.763	0.00145722	-1.11203	Up	129
DSG4	330.402	165.826	0.00583101	0.994556	Down	131
S100A14	118.918	252.791	0.00904139	-1.08798	Up	175
CALML5	95.9053	209.492	0.00115439	-1.12721	Up	176
CRCT1	106.077	211.026	0.00777877	-0.992302	Up	201
UACA	176.303	57.0731	0.00361431	1.62718	Down	256
CSTB	55.1472	111.072	0.00425642	-1.01013	Up	337
KRTAP10-11	50.4241	108.91	0.00949219	-1.11096	Up	355
S100A11	36.9848	106.016	0.00144429	-1.51928	Up	368
EPRS	114.23	44.6856	0.000252644	1.35406	Down	375
PSMG4	52.2073	111.74	0.0043213	-1.09782	Up	394
SRSF5	110.663	53.5841	0.00960074	1.04629	Down	402
TMSB10	45.3321	90.8628	0.00592355	-1.00316	Up	430
EIF3A	77.1339	37.5718	0.00874405	1.03771	Down	454
SERP1	36.9641	97.7707	0.000133625	-1.40328	Up	508
RB1CC1	69.8473	35.6268	0.00743664	0.97124	Down	523
HSP90B1	63.042	30.6048	0.0051442	1.04255	Down	603
LGALS1	27.6753	77.5262	0.000674789	-1.48608	Up	608
KIAA0907	82.5871	26.5231	0.000783274	1.63867	Down	611
CRABP2	26.6295	52.5562	0.00799664	-0.980834	Up	638
FAM129B	27.4973	55.2913	0.00582402	-1.00776	Up	702
HECTD1	49.7699	23.7126	0.00306618	1.06962	Down	736
CCPG1	43.207	20.1184	0.00793493	1.10275	Down	801
MAPK3	23.3677	46.5624	0.0083919	-0.994651	Up	822
GET4	23.2826	48.5048	0.00426267	-1.05887	Up	828
CYR61	51.9322	9.77582	0.00175467	2.40934	Down	885
C26H10orf118	43.2314	9.42517	0.000123948	2.19749	Down	905
AVPI1	20.7537	45.1057	0.00967925	-1.11994	Up	917
CAST	39.0147	18.1127	0.00298342	1.10702	Down	936
ARGLU1	43.371	19.6587	0.00427929	1.14157	Down	937
GLTSCR2	19.9568	41.878	0.00318102	-1.06931	Up	947
PTPN13	35.6855	13.8479	0.00165682	1.36567	Down	1016
RMRP	7.32507	65.3416	0.000279774	-3.15709	Up	1029
TNFRSF6B	15.571	36.2236	0.00460233	-1.21807	Up	1041
DDX17	32.9031	15.6924	0.00482712	1.06816	Down	1099
TOP1	33.5561	11.1657	0.000135068	1.5875	Down	1106
RPS6KB2	16.8715	33.9987	0.00465678	-1.01089	Up	1137
MGP	13.8473	33.1165	0.00399192	-1.25795	Up	1150
HSP90AA1	32.3077	13.6115	0.00116103	1.24705	Down	1165
VAT1	12.5796	31.6222	0.00252133	-1.32985	Up	1195
IPO7	27.3394	13.5239	0.00482572	1.01547	Down	1211
KCNK6	13.4283	33.4833	0.00300754	-1.31817	Up	1231
OGT	28.402	8.47869	0.000438463	1.74408	Down	1236
GOLGA4	29.8308	4.20042	5.9343e-07	2.8282	Down	1257
EFHD2	11.7391	24.2212	0.0048424	-1.04495	Up	1263
PPARD	13.1272	25.4852	0.00743554	-0.957102	Up	1273
EIF5B	27.5994	5.45831	3.12243e-07	2.33811	Down	1304
BCAS4	10.6392	25.7357	0.00131482	-1.27438	Up	1367
C1H21orf33	12.635	25.5303	0.00888472	-1.01479	Up	1379
KIF5B	22.3545	7.89825	0.000744049	1.50096	Down	1383
BMP7	13.3863	27.0026	0.00643553	-1.01234	Up	1400
SON	23.1293	10.3813	0.00212234	1.15574	Down	1458
SDF2L1	9.62906	24.9842	0.00170337	-1.37555	Up	1519
PRPF4B	24.4635	9.56173	0.000423428	1.35529	Down	1524
HNRNPH1	20.9607	9.70946	0.00616394	1.11023	Down	1529
SLC9A3R1	11.0828	23.6505	0.00580353	-1.09355	Up	1560
CSRP1	10.0828	20.0475	0.00973397	-0.991532	Up	1567
DEGS2	6.50939	24.3231	5.72858e-05	-1.90173	Up	1575
USP16	21.8268	6.67591	0.000478007	1.70907	Down	1596
ANKHD1	20.9063	9.46257	0.0018235	1.14364	Down	1636
TPR	22.0051	4.58177	5.60013e-06	2.26386	Down	1645
SERF2	9.82517	21.8632	0.00406006	-1.15395	Up	1646
CSTA	6.5456	18.5877	0.00259934	-1.50575	Up	1721
SYTL2	16.1783	7.24279	0.00180363	1.15944	Down	1807
TTLL12	7.62314	19.5166	0.00135034	-1.35625	Up	1826
PFKL	8.882	17.7251	0.00817177	-0.996835	Up	1854
KTN1	15.1267	3.44825	2.7336e-05	2.13316	Down	1879
PNN	18.2299	4.8209	0.000203131	1.91894	Down	1884
SRSF11	14.3166	4.87793	0.00197853	1.55335	Down	1897
SIVA1	5.58204	15.3342	0.00399162	-1.45789	Up	1920
HSPH1	18.4072	7.16082	0.00188562	1.36207	Down	1923
ALKBH4	6.32078	15.591	0.00267717	-1.30254	Up	1925
PTPN13	15.8632	6.15328	0.0011443	1.36626	Down	1941
EXPH5	18.0247	5.95673	0.00116857	1.59738	Down	1955
RPTN	16.1792	4.22721	0.00717776	1.93636	Down	1958
HRAS	6.74501	17.9602	0.00129011	-1.41291	Up	1965
TRPS1	16.4476	7.29269	0.0027848	1.17335	Down	1992
PRPF38B	16.4122	3.76318	0.000305353	2.12474	Down	2053
SF3B1	14.6353	6.20543	0.00151322	1.23784	Down	2059
TPGS1	5.85665	17.17	0.000179321	-1.55175	Up	2069
TRIP11	17.1598	3.27057	7.85481e-08	2.39142	Down	2076
USP8	14.9546	3.6738	1.32908e-05	2.02525	Down	2120
DNAJC21	15.4189	6.06902	0.00400376	1.34516	Down	2128
IWS1	15.5283	4.48485	1.3562e-05	1.79177	Down	2134
SSB	15.4929	4.44288	0.000108858	1.80204	Down	2136
H1FX	6.71503	16.22	0.00218616	-1.27231	Up	2149
BTAF1	14.9183	6.30412	0.0030307	1.24272	Down	2166
TAF15	13.6932	5.95178	0.00678869	1.20207	Down	2187
SLK	12.5507	3.72874	2.56377e-05	1.75101	Down	2201
CCDC85B	5.97499	15.3501	0.00169338	-1.36124	Up	2213
AMDHD2	4.84865	12.8023	0.000935361	-1.40075	Up	2224
CAPN1	6.96307	14.4764	0.0095626	-1.0559	Up	2236
C3H1orf122	6.76808	15.2923	0.00960363	-1.17598	Up	2274
KRT19	5.72191	14.1616	0.00237778	-1.30742	Up	2323
ZCCHC6	12.5064	5.62242	0.00489329	1.1534	Down	2345
LUC7L3	13.7764	2.87912	1.41595e-05	2.2585	Down	2350
SMCHD1	12.5799	5.31167	0.00239076	1.24389	Down	2363
SEC63	11.44	4.73223	0.00400447	1.27349	Down	2374
PCSK7	6.52395	12.729	0.00846568	-0.964305	Up	2390
PHACTR4	12.8228	5.78698	0.00327821	1.14783	Down	2421
C15H11orf71	5.31446	13.6809	0.00522758	-1.36417	Up	2438
PADI4	4.84434	10.7093	0.00564839	-1.14449	Up	2441
CD2AP	10.9589	4.79458	0.00421932	1.19263	Down	2452
TMEM127	6.07341	12.4011	0.0103662	-1.02988	Up	2475
SYNGR1	5.84576	12.4983	0.00740829	-1.09627	Up	2557
ZC3H11A	11.0162	3.96055	0.000369393	1.47586	Down	2559
YTHDC1	10.818	4.78541	0.00850693	1.17672	Down	2577
SFPQ	12.26	4.82502	0.00135764	1.34535	Down	2579
FTH1	3.8691	14.8329	7.49662e-05	-1.93873	Up	2593
KRT9	1.83425	14.3381	0.00246309	-2.96659	Up	2596
GIGYF2	11.3802	5.3325	0.00952153	1.09364	Down	2641
USP48	11.221	4.98128	0.00369746	1.17162	Down	2644
ROCK2	9.79046	2.13293	3.88492e-06	2.19854	Down	2663
CLIP1	9.22048	3.27615	0.000258859	1.49284	Down	2699
TTC37	10.5687	4.30029	0.00264238	1.2973	Down	2721
PPDPF	4.31065	11.5755	0.00557386	-1.42509	Up	2733
MACF1	9.19872	4.25983	0.0061889	1.11064	Down	2796
EIF3F	4.35151	9.29661	0.00452131	-1.09519	Up	2901
LRRC28	4.90586	11.5352	0.00479338	-1.23347	Up	2908
BRD7	9.43445	4.14485	0.00474736	1.18662	Down	2923
MGST1	4.15204	9.07444	0.00443787	-1.12799	Up	2949
PRPF40A	9.45861	2.60346	0.000144148	1.8612	Down	2958
SFRS18	9.45652	1.74373	5.0234e-05	2.43913	Down	3043
TMF1	7.54942	2.65749	0.00364669	1.5063	Down	3057
MFN1	8.7642	3.8701	0.00700035	1.17925	Down	3072
TRAPPC8	8.39975	4.03943	0.00991174	1.05619	Down	3079
ALCAM	9.15373	2.85639	0.000660801	1.68017	Down	3082
ISOC1	3.67215	9.60081	0.0103561	-1.38653	Up	3083
USP47	8.42823	3.62924	0.00632174	1.21556	Down	3085
CEBPZ	8.24959	3.41991	0.00864637	1.27037	Down	3133
RANBP2	9.28237	4.03046	0.00257845	1.20355	Down	3151
SLTM	9.46275	2.0964	1.63546e-05	2.17435	Down	3169
FSTL3	1.77842	7.8538	2.50721e-06	-2.1428	Up	3246
DDX46	7.61469	2.63078	0.000820735	1.53329	Down	3297
GOLGB1	7.81131	1.78424	4.22168e-06	2.13025	Down	3308
SREK1	8.87381	1.36995	2.20483e-05	2.69543	Down	3314
MYO5A	8.26137	3.49904	0.00235773	1.23942	Down	3353
PPM1K	9.23141	2.52351	0.00044181	1.87112	Down	3406
POLR2A	4.05142	7.94406	0.00995319	-0.971448	Up	3424
INTS4	7.43513	3.43363	0.00488448	1.11462	Down	3436
ASCC3	8.5516	2.94945	0.000469121	1.53575	Down	3448
LUC7L2	7.6345	2.7495	0.00213389	1.47336	Down	3453
EIF4G3	8.11286	2.84565	0.000789498	1.51145	Down	3460
ITM2C	3.19713	7.76528	0.00783952	-1.28026	Up	3493
DGKZ	3.27636	8.11186	0.00168495	-1.30794	Up	3526
LEO1	7.19623	2.65511	0.00409791	1.43847	Down	3559
TOP2B	6.98194	2.84991	0.00197574	1.29271	Down	3604
SPNS2	2.49714	6.9031	0.00113808	-1.46697	Up	3616
KIF21A	6.29882	1.72577	0.000340921	1.86784	Down	3636
ATRX	6.78187	1.81943	2.63046e-05	1.8982	Down	3649
SMC3	5.98048	2.00032	0.00696566	1.58003	Down	3669
PRRC2C	6.83412	1.79071	5.4319e-05	1.93222	Down	3695
ZNF131	6.45667	2.21493	0.00306439	1.54353	Down	3712
ATAD2B	6.06217	2.60669	0.00420353	1.21762	Down	3717
ANKRD12	7.153	0.808569	6.36255e-11	3.14511	Down	3751
FOXE1	2.19663	5.72374	0.00261814	-1.38166	Up	3757
ZNF638	6.50096	1.58417	3.07876e-05	2.03692	Down	3788
TRMT2A	2.48333	7.12674	0.000648062	-1.52097	Up	3791
UPF2	6.1307	1.35474	1.47673e-05	2.17803	Down	3796
IL17RA	2.88179	5.98574	0.00759937	-1.05456	Up	3813
FSCN1	3.18577	7.65898	0.00378856	-1.26551	Up	3817
HSCB	1.98588	7.46395	0.00371749	-1.91016	Up	3853
LARP7	5.87246	2.31963	0.00989923	1.34007	Down	3859
USP34	5.96532	2.34968	0.000612651	1.34414	Down	3877
SPARC	2.76137	6.77446	0.00858853	-1.29472	Up	3884
PPP6R3	5.95681	2.64369	0.00582659	1.17199	Down	3896
CDC5L	5.68848	2.54271	0.0091382	1.16168	Down	3899
ARHGAP5	5.29672	2.43029	0.00614265	1.12397	Down	3910
MLYCD	1.93334	6.79962	0.00114885	-1.81436	Up	3916
CBS	2.65839	5.84334	0.00536399	-1.13624	Up	4055
PRPF39	5.75065	1.92075	0.00649722	1.58205	Down	4056
CRNKL1	6.38468	2.40337	0.00222972	1.40956	Down	4089
AKAP9	5.24981	0.95958	1.05516e-07	2.45179	Down	4101
XDH	5.75468	2.68697	0.00801018	1.09875	Down	4103
NUP98	4.90205	2.34538	0.00910289	1.06357	Down	4109
EEA1	5.08568	1.20575	0.000266647	2.07651	Down	4129
ITSN2	4.83704	2.18618	0.0059842	1.14572	Down	4145
BRAF	5.269	2.51748	0.00574486	1.06555	Down	4168
RNF20	5.20808	2.07302	0.00768355	1.32902	Down	4187
TRIM62	2.19136	6.34796	0.00427002	-1.53447	Up	4198
RLF	5.53926	2.5198	0.00677995	1.13639	Down	4231
PLXNA2	2.07831	4.40115	0.00981784	-1.08247	Up	4239
MIA3	5.62897	1.69719	4.81803e-05	1.72972	Down	4264
CHPF	1.91154	5.40495	0.000332003	-1.49955	Up	4312
SCAF11	4.93952	1.80905	0.0011883	1.44914	Down	4332
PHF3	5.21019	1.69267	0.000310819	1.62203	Down	4349
LSMEM1	4.96816	1.64175	0.00768287	1.59747	Down	4358
PTGES2	2.15056	5.7132	0.0069832	-1.40959	Up	4371
DHX29	4.99227	2.24358	0.00620283	1.15389	Down	4373
NOS3	4.69649	2.04845	0.00528836	1.19705	Down	4405
NIPBL	5.10611	1.44952	0.000142647	1.81665	Down	4412
ST6GALNAC6	1.9761	4.56651	0.00202422	-1.20844	Up	4417
SMC1A	4.72722	2.11013	0.00862197	1.16366	Down	4430
KLHL22	1.94776	5.35282	0.00271118	-1.45849	Up	4434
UBR1	5.06778	2.26758	0.00464544	1.1602	Down	4464
FMR1	4.51944	2.06355	0.00842966	1.13102	Down	4484
TET2	5.34462	1.63234	6.90754e-05	1.71115	Down	4495
INADL	4.71548	1.74812	0.00102164	1.4316	Down	4505
FAM48A	3.92712	1.51447	0.00334161	1.37466	Down	4512
C20H5orf41	4.92509	1.89989	0.00142213	1.37424	Down	4547
JHDM1D	4.73769	1.90125	0.00849814	1.31723	Down	4552
SSR1	4.6661	1.89406	0.00438562	1.30074	Down	4571
SEC24B	4.66159	2.01649	0.0082823	1.20898	Down	4572
TOPORS	4.15642	1.57237	0.0017416	1.4024	Down	4594
PPP1R12A	4.46057	1.36012	0.0029649	1.71349	Down	4601
LHPP	1.69803	5.175	0.00166311	-1.6077	Up	4621
MPHOSPH8	3.92815	1.52179	0.00330651	1.36808	Down	4623
TTC3	4.82939	1.61786	0.000147489	1.57775	Down	4629
AFF4	4.6025	1.91108	0.00277011	1.26803	Down	4655
MRPL36	1.48977	4.96778	0.00725062	-1.73751	Up	4671
LRRC47	1.9632	4.8061	0.00264198	-1.29166	Up	4692
ZNF326	4.5392	1.4162	0.000506568	1.68041	Down	4720
PPIG	4.54206	0.673884	1.63931e-05	2.75277	Down	4732
AASS	3.50227	1.24484	0.00443439	1.49233	Down	4843
VAX2	0.806733	3.67227	0.00237524	-2.18651	Up	4860
FAM20A	4.79104	2.00787	0.00893435	1.25467	Down	4872
PYCRL	1.75313	4.9288	0.00786892	-1.4913	Up	4925
LRIF1	3.865	1.49388	0.00650594	1.3714	Down	4976
PDS5A	3.76721	1.45094	0.00310957	1.37651	Down	4989
CTR9	3.99013	1.31454	0.000848265	1.60188	Down	4993
RBM25	4.16765	0.789433	2.11655e-05	2.40034	Down	5004
FBXO11	4.10463	1.64928	0.00960248	1.31541	Down	5009
DNAJC2	3.73514	0.928217	0.000746837	2.00863	Down	5020
ESF1	3.61632	1.34158	0.00638406	1.43059	Down	5025
NSF	3.80761	1.62651	0.00508966	1.2271	Down	5032
MLL5	3.19727	1.05886	0.0011217	1.59433	Down	5042
ERBB2IP	3.31732	1.45053	0.00718507	1.19344	Down	5051
ZBTB43	3.613	1.68678	0.00959072	1.09893	Down	5063
METTL3	3.95432	1.47781	0.0103568	1.41997	Down	5071
MED13	3.44952	1.63515	0.00658336	1.07697	Down	5079
USP9X	3.35976	1.34846	0.00240327	1.31704	Down	5099
C7H5orf24	4.10233	1.22434	0.00325745	1.74444	Down	5142
CABYR	4.71147	1.16512	2.47148e-05	2.0157	Down	5150
ITSN1	3.25926	1.33212	0.00943875	1.29082	Down	5154
S100A13	1.05248	4.22264	0.00968623	-2.00435	Up	5179
CSRP2	0.182425	1.80193	0.00563032	-3.30417	Up	5195
LRPPRC	3.71552	1.34574	0.00113793	1.46516	Down	5204
ROCK1	3.5548	0.661223	0.000208058	2.42656	Down	5206
ASH1L	4.02983	0.887749	1.13879e-06	2.1825	Down	5222
BAZ2B	3.52929	1.09422	0.000457466	1.68948	Down	5243
UTRN	3.27047	1.12954	0.000820588	1.53376	Down	5283
RBM6	3.28783	1.31644	0.0054657	1.3205	Down	5287
PANX2	1.2949	3.41546	0.00359805	-1.39924	Up	5305
QSER1	2.98789	1.27637	0.00915349	1.22708	Down	5326
HSPA4L	3.54269	0.98578	0.00169845	1.84551	Down	5332
ETNK2	1.5009	3.89832	0.00591012	-1.37702	Up	5339
SLC4A7	3.38683	1.56964	0.00658129	1.10951	Down	5340
SUV420H1	3.19725	1.25784	0.0023617	1.34588	Down	5381
ZNF608	3.49478	1.49612	0.00568746	1.22397	Down	5400
XIST	3.13148	1.12089	0.00436398	1.4822	Down	5409
SBNO1	3.08571	1.32582	0.00639328	1.21872	Down	5455
TNKS2	3.00297	1.1217	0.0011958	1.4207	Down	5470
PITPNM1	1.55606	3.41833	0.0079459	-1.1354	Up	5488
PARP4	2.9587	1.08351	0.00112047	1.44925	Down	5523
DDX10	2.96357	1.12035	0.00596431	1.40338	Down	5581
GCFC1	3.00253	1.08412	0.00559249	1.46965	Down	5586
KDELC2	3.94522	0.852449	0.000176777	2.21042	Down	5588
FLOT2	1.06348	3.33812	0.00858074	-1.65024	Up	5679
NFAT5	2.96309	0.893812	0.000429697	1.72906	Down	5683
TIA1	2.92059	1.0262	0.00114722	1.50895	Down	5686
TAOK1	2.58971	1.06826	0.004843	1.27753	Down	5696
XRN1	3.10798	1.22436	0.000841797	1.34395	Down	5719
BRWD1	2.77454	0.998067	0.000486518	1.47504	Down	5732
LRRCC1	2.94522	0.532563	0.000293638	2.46735	Down	5762
SERPINB8	1.18111	3.27247	0.00860113	-1.47024	Up	5778
MGMT	0.836197	3.63492	0.00403239	-2.12001	Up	5843
ZFC3H1	2.55848	1.00973	0.00277152	1.34131	Down	5851
PAN2	2.79698	1.02861	0.00614236	1.44317	Down	5858
PCM1	2.36081	0.828187	0.00799204	1.51125	Down	5874
NUDT9	2.94917	1.08672	0.00914482	1.44033	Down	5875
CEP350	2.6167	0.785167	0.00021362	1.73667	Down	5878
RABEP1	2.85779	1.02145	0.00251592	1.48428	Down	5886
CUL5	2.39706	1.01746	0.00895488	1.2363	Down	5897
ALKBH3	0.887286	2.96377	0.00426774	-1.73996	Up	5912
NKTR	2.65651	0.435788	5.09555e-07	2.60783	Down	5919
ARFGEF2	2.61935	1.16803	0.00813807	1.16513	Down	5921
KHNYN	1.14218	2.51202	0.00860978	-1.13705	Up	5935
S1PR3	3.39469	1.20893	0.00523164	1.48956	Down	5945
TANK	2.3961	0.659625	0.0031291	1.86097	Down	5952
CTTNBP2	2.74057	0.999965	0.0029445	1.45453	Down	5959
ERI3	0.7357	3.13271	0.00037743	-2.09022	Up	6001
OSBPL5	0.728714	1.99206	0.00552829	-1.45083	Up	6040
BDP1	2.56449	0.608227	1.58701e-05	2.07599	Down	6057
RSF1	2.21585	0.903395	0.00240831	1.29443	Down	6058
KLHL20	2.64095	0.875983	0.00198004	1.59208	Down	6064
GAB1	2.32839	0.942084	0.00840145	1.30541	Down	6084
SPRY1	2.71365	1.05382	0.00658466	1.3646	Down	6092
RNF111	2.74767	1.07529	0.00245893	1.35349	Down	6099
CKAP5	2.15439	0.702987	0.000834928	1.61571	Down	6104
CHD9	2.61063	0.768466	0.00014238	1.76434	Down	6128
GFPT1	2.95359	0.871951	0.00367744	1.76015	Down	6150
SDK1	1.12797	2.78752	0.00639075	-1.30525	Up	6197
FAM208B	2.44853	1.12839	0.00601209	1.11764	Down	6207
ZAK	2.25791	0.940634	0.00402698	1.26328	Down	6229
RFC1	2.02932	0.413666	4.65149e-05	2.29446	Down	6261
FAM53B	0.624416	2.23573	0.00254492	-1.84017	Up	6274
ZBTB1	2.11419	0.792949	0.00665557	1.41481	Down	6289
SMC4	2.43364	0.408412	8.63666e-05	2.57502	Down	6308
SETD2	2.1297	0.831445	0.00293282	1.35695	Down	6323
MIER1	2.21474	0.7879	0.00203582	1.49105	Down	6353
BPTF	2.13803	0.626025	0.00161308	1.77199	Down	6358
ESCO1	2.30667	0.63273	0.00219711	1.86615	Down	6369
ARID4A	2.36032	0.311028	4.14473e-05	2.92386	Down	6385
PRR5	0.628563	2.60691	0.000313664	-2.05221	Up	6419
YTHDC2	2.26765	0.848758	0.00509533	1.41778	Down	6454
ARHGAP42	2.21694	0.878649	0.00164443	1.33521	Down	6470
SAC3D1	0.839615	2.66639	0.00202424	-1.66709	Up	6515
TRPM7	2.31128	0.559305	0.000241334	2.04698	Down	6530
ABHD16B	0.49434	2.25586	0.00886447	-2.1901	Up	6532
UTP20	2.08575	0.848748	0.00499737	1.29716	Down	6534
MCCC2	2.4788	0.811987	0.00499449	1.61011	Down	6545
ZNF580	0.818459	3.18562	0.0034117	-1.96059	Up	6576
VPS13B	2.25739	0.796204	0.000282471	1.50345	Down	6583
UBN2	2.4874	0.819191	0.000660207	1.60237	Down	6594
EPM2AIP1	2.1874	0.92601	0.00386538	1.24012	Down	6654
CHD1	1.94372	0.637494	0.00191651	1.60833	Down	6676
RAD50	1.6887	0.392801	0.00698861	2.10404	Down	6700
TMEM209	2.17617	0.708547	0.00404169	1.61886	Down	6704
ARL5B	2.11218	0.776009	0.00148302	1.44459	Down	6706
BIRC6	2.00012	0.828437	0.00465014	1.27162	Down	6713
RBAK	2.31783	0.588903	0.00157738	1.97668	Down	6751
GCC2	1.59684	0.53888	0.00297611	1.56718	Down	6754
TCERG1	1.96043	0.310687	2.18281e-05	2.65764	Down	6789
ARC	0.617852	1.7588	0.00742581	-1.50926	Up	6790
PABPN1	1.91919	0.522806	0.00260874	1.87615	Down	6803
PPIL4	1.90039	0.653108	0.00673179	1.5409	Down	6844
PHLDB2	1.73472	0.649837	0.0102778	1.41656	Down	6892
C26H10orf95	2.69638	0.618692	0.00452174	2.12373	Down	6894
GLRX	2.94718	0.278238	0.00126187	3.40494	Down	6896
C19H17orf70	0.439949	1.83018	0.000467351	-2.05658	Up	6906
DMTF1	1.87544	0.694055	0.00629621	1.43411	Down	6957
UBR2	1.81647	0.794806	0.00980677	1.19246	Down	6964
THUMPD1	1.68728	0.638808	0.00705909	1.40124	Down	6970
MYO5C	1.87358	0.463248	0.00107471	2.01594	Down	7039
RSPO1	0.610549	2.1953	0.00233736	-1.84624	Up	7061
MYSM1	1.57327	0.52939	0.00163998	1.57136	Down	7065
JAK2	1.48018	0.43363	0.00154312	1.77123	Down	7098
CTAGE5	1.67937	0.669126	0.00686244	1.32757	Down	7119
HSPA6	2.66449	0.508801	0.00569194	2.38869	Down	7128
BNIP1	1.79	0.55911	0.00485007	1.67875	Down	7129
CHST10	0.327069	1.42966	0.00361765	-2.128	Up	7147
BAK1	0.657253	1.95931	0.00827246	-1.57582	Up	7156
SEC24D	0.651359	1.66544	0.00971935	-1.35438	Up	7158
MASP2	2.30621	0.493729	8.3607e-05	2.22374	Down	7159
TMEM151A	0.55707	2.13858	0.00398085	-1.94072	Up	7168
ANGPTL2	0.411187	2.3799	0.00378615	-2.53303	Up	7175
FAM83A	0.337754	2.12412	0.00739315	-2.65282	Up	7181
MYNN	1.54542	0.503872	0.00230707	1.61687	Down	7299
C15H11orf49	0.50417	1.89489	0.00443223	-1.91013	Up	7313
GABRE	1.70193	0.379578	0.00125021	2.16471	Down	7352
PWWP2A	2.09968	0.437865	0.00215061	2.26161	Down	7355
MATR3	1.80796	0.424245	0.000392764	2.09139	Down	7424
SYNE2	1.21704	0.344919	0.00157851	1.81905	Down	7502
SMC6	1.49115	0.43618	0.00352679	1.77343	Down	7510
ATAT1	1.71265	0.264778	0.000682148	2.69338	Down	7513
THOC1	1.63095	0.475171	0.00206912	1.7792	Down	7514
PHIP	1.27145	0.270825	0.000305182	2.23104	Down	7527
MEF2A	1.44307	0.445774	0.00182821	1.69476	Down	7633
GPRC5C	0.510073	1.60846	0.00556146	-1.65691	Up	7635
PIKFYVE	1.35045	0.440592	0.00139319	1.61592	Down	7663
APC	1.3306	0.44849	0.00297818	1.56893	Down	7694
ZNF605	1.28041	0.302404	0.00027881	2.08206	Down	7716
ADSSL1	0.314601	1.34029	0.0072393	-2.09095	Up	7725
LATS1	1.46616	0.422912	0.00176669	1.79361	Down	7774
KIAA1109	1.32521	0.341222	0.000587185	1.95744	Down	7801
C25H16orf93	1.33761	0.35857	0.00667684	1.89933	Down	7898
TMEM168	1.14494	0.470805	0.00966324	1.28207	Down	7910
RBM26	1.20796	0.208611	6.21578e-06	2.53369	Down	7921
USP24	1.18975	0.475935	0.00970549	1.32182	Down	7941
GTF2H2	1.04929	0.0839799	0.0102671	3.64322	Down	7993
CENPC1	1.18969	0.190361	0.00045016	2.64377	Down	8071
NEB	1.1448	0.22515	3.07442e-05	2.34613	Down	8102
RAB11FIP2	1.00517	0.201559	0.0039321	2.31817	Down	8140
IFT88	1.33539	0.180166	0.000232262	2.88986	Down	8153
CNTRL	0.977021	0.327254	0.00648309	1.57798	Down	8171
PAQR6	0.224648	0.992524	0.00858754	-2.14343	Up	8182
ZFPM1	0.0753741	1.49353	7.46038e-07	-4.30851	Up	8199
NIN	1.23488	0.302938	6.78223e-05	2.02728	Down	8206
ADRA1B	0.183225	1.63001	0.000584193	-3.15319	Up	8246
ZNF292	0.919847	0.243645	0.00119526	1.91661	Down	8257
MGA	1.17114	0.280112	4.42253e-05	2.06383	Down	8305
ABCC5	1.21337	0.317547	0.00087911	1.93399	Down	8314
VPS13C	0.855439	0.297471	0.00336153	1.52392	Down	8351
RNF43	1.13061	0.337709	0.00220349	1.74325	Down	8353
ATP12A	1.34259	0.128854	0.00333876	3.38122	Down	8457
PACS1	0.349507	1.24875	0.00729621	-1.83709	Up	8476
BCO2	0.189535	1.12919	0.00168519	-2.57475	Up	8494
RTN2	0.103591	0.812089	0.00757114	-2.97074	Up	8516
PSIP1	0.914839	0.128386	0.000542344	2.83303	Down	8647
BOD1L	0.64654	0.17617	0.00506817	1.87577	Down	8677
GAB2	0.275533	1.02239	0.00266622	-1.89165	Up	8697
C5H12orf35	0.936342	0.15632	0.000613937	2.58253	Down	8755
THAP2	0.760011	0.178012	0.0097554	2.09405	Down	8758
STK32C	0.141867	1.15403	0.00137612	-3.02408	Up	8823
PKIA	0.1268	1.23214	0.000826904	-3.28054	Up	8844
RAB20	0.0878981	0.816185	0.00455945	-3.21499	Up	8892
PIK3R1	0.902805	0.260636	0.00337796	1.79238	Down	8942
TNC	0.208106	0.869018	0.000511796	-2.06207	Up	8995
NUDT4	0.976091	0.0899356	0.000605666	3.44005	Down	9005
REV3L	0.560618	0.184206	0.00884358	1.6057	Down	9053
PRKDC	0.668798	0.268962	0.00824736	1.31417	Down	9089
SEMA3D	0.699639	0.129799	0.00105213	2.43033	Down	9180
MSANTD2	0.620723	0.158219	0.00500546	1.97203	Down	9199
NCL	0.976371	0.0786585	0.00137584	3.63376	Down	9302
FAM199X	0.779209	0.139263	0.00493331	2.4842	Down	9320
THOC2	0.60439	0.190845	0.00573528	1.66308	Down	9344
SRRM3	0.192398	0.913788	0.00515766	-2.24776	Up	9351
ZNF260	0.613255	0.114482	0.000807468	2.42137	Down	9383
SETX	0.515246	0.166848	0.00805017	1.62672	Down	9389
CDADC1	0.590966	0.11747	0.00746864	2.33078	Down	9431
CASP8AP2	0.601294	0.133101	0.00064105	2.17555	Down	9452
C20H5orf42	0.596817	0.156429	0.00223417	1.93178	Down	9463
RBM12B	0.565372	0.0924076	0.000700402	2.61312	Down	9471
MDN1	0.573503	0.199189	0.00300586	1.52566	Down	9502
VPS13A	0.560856	0.170578	0.00376507	1.7172	Down	9605
RAB37	0.145424	0.671975	0.00806937	-2.20814	Up	9648
MALT1	0.562176	0.0643996	0.00721861	3.1259	Down	9890
ADAT1	0.373553	0.0821522	0.00482718	2.18494	Down	9897
FLVCR2	0.076201	0.37054	0.0078988	-2.28175	Up	10018
ZBTB41	0.430213	0.117059	0.00797161	1.87782	Down	10138
TMTC2	0.443845	0.0978584	0.00950022	2.18129	Down	10173
ANPEP	0.0442369	0.383608	0.00974566	-3.11631	Up	10215
SLC5A3	0.41006	0.118753	0.00834971	1.78787	Down	10271
ETNK1	0.306684	0.0528005	0.0103901	2.53813	Down	10307
CENPF	0.347917	0.0595814	0.00168835	2.54581	Down	10311
GPR19	0.0232592	0.427037	0.00565955	-4.19849	Up	10892
FAM107A	0.310989	0.0185023	0.00540521	4.07109	Down	10937
HNF4A	0.0318117	0.369021	0.00964606	-3.53608	Up	10949
STON1	0.0280627	0.278013	0.00532487	-3.30843	Up	11037
DYSF	0.0186699	0.252122	0.00464399	-3.75533	Up	11161
PLEKHG7	0.0143166	0.246508	0.00350786	-4.10587	Up	11345
COL3A1	0.0185466	0.310121	0.0058746	-4.0636	Up	11410

## Sheet: table S3
Table S3. DifferentiallyDifferently expressed genes in the wool follicle bulb during catagen-late telogen/early anagen transformation.
Gene Symbol	Gene expression (RPKM)		P-Value	Log2FoldChange	Regulation Direction	Rank
	Catagen	Late Telogen/Early Anagen
TCHH	1095.85	3744.93	0.000585901	-1.77288	Up	26
MT4	1316.81	639.207	0.00699831	1.04269	Down	53
IVL	82.6514	240.902	0.00382591	-1.54333	Up	236
RPS21	121.48	34.0334	6.45011e-06	1.83569	Down	407
GYG1	93.101	41.3583	0.00985297	1.17062	Down	442
MRP63	104.451	27.4067	2.20335e-05	1.93022	Down	496
SERP1	97.7707	40.8802	0.000802592	1.258	Down	508
SPINK5	31.4223	93.986	0.00223243	-1.58066	Up	530
C11H9orf169	79.7475	12.1872	1.75759e-05	2.71008	Down	617
TCHHL1	18.8398	82.5129	0.00040644	-2.13084	Up	621
LOR	89.7047	9.2699	1.14409e-06	3.27456	Down	652
C13H20orf24	55.6269	19.5601	0.000146115	1.50787	Down	817
C26H10orf118	9.42517	42.3728	0.000579548	-2.16855	Up	905
NDUFA4L2	36.1431	14.2943	0.00758266	1.33828	Down	1023
RMRP	65.3416	9.02832	0.00492413	2.85547	Down	1029
BAZ1A	14.7529	37.1466	0.00970758	-1.33223	Up	1060
TOP1	11.1657	30.0898	0.00236421	-1.4302	Up	1106
C15H11orf34	13.5486	40.5921	0.00188329	-1.58306	Up	1169
DSC1	10.3891	34.6809	0.000114514	-1.73907	Up	1214
OGT	8.47869	27.9109	0.0022265	-1.71892	Up	1236
IGFALS	11.3776	32.5626	0.0063146	-1.51701	Up	1240
GOLGA4	4.20042	29.5509	3.14203e-06	-2.8146	Up	1257
LDHB	30.3751	15.1611	0.00863083	1.00251	Down	1274
EIF5B	5.45831	27.5024	2.13524e-06	-2.33303	Up	1304
KIF5B	7.89825	26.6899	0.000322578	-1.75669	Up	1383
STC2	1.05496	55.0371	1.48023e-05	-5.70514	Up	1393
USP16	6.67591	20.0334	0.00391271	-1.58537	Up	1596
TPR	4.58177	20.4161	6.75668e-05	-2.15573	Up	1645
MT1E	25.2374	5.49248	0.00022358	2.20003	Down	1655
COX7A2	22.7069	8.21811	0.00351072	1.46625	Down	1706
CALD1	7.76526	22.5758	0.00437463	-1.53967	Up	1710
TMEM160	23.1237	2.9233	5.6703e-05	2.98371	Down	1720
7-Sep	7.41399	19.9223	0.00476081	-1.42606	Up	1748
SYTL2	7.24279	17.7215	0.00287631	-1.29088	Up	1807
KTN1	3.44825	20.2153	3.90412e-06	-2.55151	Up	1879
PNN	4.8209	15.6379	0.00293024	-1.69768	Up	1884
SRSF11	4.87793	19.2661	0.000321477	-1.98172	Up	1897
PTPN13	6.15328	15.2329	0.00885625	-1.30777	Up	1941
FAM173A	20.151	7.41145	0.00156639	1.44302	Down	1943
RPTN	4.22721	16.5125	0.00960205	-1.96578	Up	1958
PSPH	6.60763	25.384	0.00770429	-1.94171	Up	1964
PRPF38B	3.76318	14.4002	0.00224842	-1.93607	Up	2053
TRIP11	3.27057	13.7321	1.81171e-05	-2.06994	Up	2076
USP8	3.6738	14.5523	0.000103604	-1.98591	Up	2120
IWS1	4.48485	12.7708	0.00115035	-1.50972	Up	2134
SSB	4.44288	12.7671	0.00345342	-1.52286	Up	2136
SLK	3.72874	15.0963	1.19892e-05	-2.01743	Up	2201
LUC7L3	2.87912	12.0548	0.000255071	-2.06591	Up	2350
PSAT1	5.29401	19.6875	0.0103493	-1.89485	Up	2368
SEC63	4.73223	12.168	0.00582354	-1.3625	Up	2374
CD2AP	4.79458	11.4035	0.00856414	-1.25	Up	2452
ZC3H11A	3.96055	10.549	0.00338327	-1.41333	Up	2559
TJP2	4.82327	12.0587	0.00497193	-1.322	Up	2651
ROCK2	2.13293	12.2091	1.27138e-06	-2.51705	Up	2663
CLIP1	3.27615	11.113	9.79166e-05	-1.76218	Up	2699
LRRC28	11.5352	4.79488	0.00475369	1.26648	Down	2908
PRPF40A	2.60346	8.65541	0.00154641	-1.73317	Up	2958
SCEL	2.7825	11.2647	0.00157875	-2.01736	Up	2962
SFRS18	1.74373	8.78695	0.000276116	-2.33319	Up	3043
CLDN8	3.87886	11.4705	0.00443801	-1.56422	Up	3044
TMF1	2.65749	9.67255	0.00180236	-1.86383	Up	3057
SLTM	2.0964	7.38052	0.000963247	-1.81581	Up	3169
GPR155	3.21411	10.5074	0.00142898	-1.70892	Up	3290
DDX46	2.63078	7.63563	0.0028686	-1.53726	Up	3297
GOLGB1	1.78424	8.19725	1.37586e-05	-2.19983	Up	3308
SREK1	1.36995	7.49881	0.00023442	-2.45254	Up	3314
HIF1A	2.97583	8.75428	0.00163432	-1.55669	Up	3342
EMID1	7.92891	3.24017	0.00296219	1.29105	Down	3393
ELK1	9.01495	3.70639	0.00517424	1.2823	Down	3407
KIDINS220	2.85073	7.74302	0.00239959	-1.44157	Up	3503
CIR1	1.98948	7.93649	0.00480228	-1.99611	Up	3523
KIF21A	1.72577	7.43689	0.000178292	-2.10746	Up	3636
ATRX	1.81943	6.8104	0.000139027	-1.90425	Up	3649
SMC3	2.00032	7.28561	0.00366868	-1.86482	Up	3669
PRRC2C	1.79071	6.46336	0.000406622	-1.85175	Up	3695
ANKRD12	0.808569	6.6764	1.90788e-09	-3.04563	Up	3751
SRPK2	2.71024	7.11347	0.00681152	-1.39214	Up	3764
SLC15A1	2.4758	7.83263	0.00361954	-1.6616	Up	3766
ZNF638	1.58417	6.29533	0.000207487	-1.99055	Up	3788
UPF2	1.35474	6.84042	1.59356e-05	-2.33607	Up	3796
USP34	2.34968	5.54405	0.00685436	-1.23848	Up	3877
ARHGAP5	2.43029	5.92601	0.00751805	-1.28593	Up	3910
ABCA12	2.29545	6.4145	0.00184127	-1.48256	Up	3940
AKAP9	0.95958	6.32726	3.98596e-08	-2.72111	Up	4101
EEA1	1.20575	6.10417	0.000150652	-2.33987	Up	4129
ITSN2	2.18618	5.29032	0.00750828	-1.27495	Up	4145
CPM	2.0556	6.01349	0.00264249	-1.54864	Up	4248
MIA3	1.69719	4.31766	0.00512625	-1.3471	Up	4264
SCAF11	1.80905	4.54667	0.00836242	-1.32958	Up	4332
RRBP1	2.24869	5.72726	0.00472559	-1.34876	Up	4338
SEC62	2.03809	6.13039	0.00452076	-1.58876	Up	4348
PHF3	1.69267	4.32123	0.00747497	-1.35214	Up	4349
TMEM123	1.96697	5.8973	0.00806928	-1.58408	Up	4353
NIPBL	1.44952	4.30509	0.00333073	-1.57047	Up	4412
KRT77	6.12121	1.30873	0.00138879	2.22566	Down	4490
FILIP1L	1.50745	4.95398	0.00685679	-1.71648	Up	4503
FAM48A	1.51447	4.97776	0.00101938	-1.71668	Up	4512
RPL39	6.42005	0.315958	0.000456144	4.34478	Down	4517
RGNEF	1.72698	4.79411	0.00739861	-1.47301	Up	4555
TOPORS	1.57237	4.38032	0.00371514	-1.47809	Up	4594
PPP1R12A	1.36012	4.26029	0.00879289	-1.64721	Up	4601
MPHOSPH8	1.52179	4.56346	0.00233818	-1.58436	Up	4623
PPIG	0.673884	4.33222	7.69236e-05	-2.68453	Up	4732
UGDH	1.75895	5.48601	0.0030275	-1.64104	Up	4832
THUMPD3	1.71571	4.47537	0.0103784	-1.3832	Up	4842
AASS	1.24484	4.33966	0.00131168	-1.80162	Up	4843
RBM25	0.789433	3.52482	0.000291073	-2.15866	Up	5004
DNAJC2	0.928217	3.78013	0.00240307	-2.0259	Up	5020
MLL5	1.05886	4.11683	0.000325069	-1.95902	Up	5042
USP9X	1.34846	3.46577	0.00569127	-1.36186	Up	5099
LGR4	1.34507	3.70367	0.006138	-1.46127	Up	5114
ROCK1	0.661223	3.58348	0.000381031	-2.43815	Up	5206
ASH1L	0.887749	2.83232	0.000779435	-1.67376	Up	5222
BAZ2B	1.09422	3.04987	0.00673567	-1.47885	Up	5243
UTRN	1.12954	3.17043	0.00365463	-1.48894	Up	5283
TNKS2	1.1217	2.92922	0.00664614	-1.38483	Up	5470
PARP4	1.08351	2.85021	0.0059814	-1.39535	Up	5523
RAPGEF2	1.17933	3.36183	0.00274835	-1.51128	Up	5527
KIF3A	1.17898	3.37931	0.00348888	-1.51919	Up	5550
NFAT5	0.893812	2.59646	0.00520171	-1.5385	Up	5683
TAOK1	1.06826	2.75851	0.00859357	-1.36863	Up	5696
PTPRK	0.994308	3.32127	0.0050667	-1.73997	Up	5709
BRWD1	0.998067	2.55007	0.0062222	-1.35333	Up	5732
LRRCC1	0.532563	2.78128	0.00106442	-2.38472	Up	5762
PCM1	0.828187	2.77904	0.0055211	-1.74656	Up	5874
CEP350	0.785167	2.56287	0.00106099	-1.70669	Up	5878
NKTR	0.435788	2.77512	2.04195e-06	-2.67085	Up	5919
TANK	0.659625	2.75302	0.00285005	-2.0613	Up	5952
ATXN2	1.11327	2.97612	0.00816025	-1.41863	Up	6002
NEMF	0.752357	2.65116	0.00786981	-1.81713	Up	6006
BDP1	0.608227	2.40382	0.000150063	-1.98265	Up	6057
RSF1	0.903395	2.45459	0.00311755	-1.44205	Up	6058
CKAP5	0.702987	2.59471	0.00053634	-1.884	Up	6104
CHD9	0.768466	2.03226	0.00784588	-1.40303	Up	6128
LMO7	0.714391	2.6766	0.00775011	-1.90561	Up	6146
LTBP1	0.98335	3.06909	0.00607547	-1.64203	Up	6167
RFC1	0.413666	2.69533	1.03022e-05	-2.70392	Up	6261
SMC4	0.408412	2.19742	0.000648125	-2.42771	Up	6308
BPTF	0.626025	2.17121	0.00375036	-1.79421	Up	6358
ARID4A	0.311028	2.21098	0.000116928	-2.82957	Up	6385
DSG2	0.809826	2.48255	0.00431742	-1.61614	Up	6415
TRPM7	0.559305	1.74012	0.00980369	-1.63748	Up	6530
CLDN3	0.69681	3.28521	0.00898101	-2.23715	Up	6546
ZNF580	3.18562	0.522324	0.00205805	2.60856	Down	6576
APTX	2.22228	0.609192	0.00968979	1.86707	Down	6629
PEA15	2.72873	0.658152	0.00245758	2.05173	Down	6633
RAD50	0.392801	2.21183	0.00178624	-2.49337	Up	6700
GCC2	0.53888	2.08606	0.000805411	-1.95274	Up	6754
TCERG1	0.310687	1.90714	0.000109269	-2.61787	Up	6789
MYH10	0.625175	2.18004	0.00129793	-1.80203	Up	6853
MDP-1	1.99986	0.146695	0.00732504	3.76901	Down	6975
CD74	2.83039	0.224132	0.00146705	3.65858	Down	7033
MYSM1	0.52939	1.57895	0.00624946	-1.57656	Up	7065
ANKRD9	1.72865	0.520241	0.00754897	1.73239	Down	7088
JAK2	0.43363	1.73011	0.000943664	-1.99633	Up	7098
TEAD1	0.611616	1.66068	0.00575115	-1.44107	Up	7261
TMEM88	0.247702	2.43614	0.00785118	-3.29792	Up	7372
CACHD1	0.444742	1.66335	0.00251009	-1.90305	Up	7385
FAM178B	0.359811	2.33406	0.00245473	-2.69753	Up	7479
SYNE2	0.344919	1.51748	0.000542919	-2.13735	Up	7502
PHIP	0.270825	1.49769	0.000165524	-2.46731	Up	7527
MAPK8IP1	1.88908	0.439462	0.00421379	2.10388	Down	7576
ZNF605	0.302404	1.23776	0.00132844	-2.03318	Up	7716
RECQL	0.313989	1.56716	0.00388625	-2.31937	Up	7754
GABPB2	0.27251	1.77353	0.00138667	-2.70224	Up	7771
BCL11A	0.234008	1.98601	0.00407532	-3.08525	Up	7842
COX10	1.51467	0.29001	0.00115829	2.38482	Down	7894
FNDC3A	0.326002	1.30635	0.0024675	-2.00259	Up	7909
RBM26	0.208611	1.15506	7.10993e-05	-2.46908	Up	7921
CSPP1	0.355445	1.25289	0.00651204	-1.81756	Up	7943
GTF2H2	0.0839799	1.36779	0.00520172	-4.02566	Up	7993
SPTBN5	0.390655	1.22488	0.00334275	-1.64867	Up	8013
RB1	0.31212	1.29944	0.00212743	-2.05772	Up	8064
CENPC1	0.190361	1.03745	0.00508068	-2.44624	Up	8071
CD46	0.365506	1.24013	0.00667173	-1.76252	Up	8098
NEB	0.22515	1.01938	0.000512961	-2.17873	Up	8102
RAB11FIP2	0.201559	1.12157	0.00753031	-2.47624	Up	8140
TMEM238	1.23983	0.101907	0.00867628	3.60482	Down	8201
ZNF292	0.243645	1.04998	0.00104078	-2.10751	Up	8257
VPS13C	0.297471	0.953627	0.00465269	-1.68068	Up	8351
NEXN	0.1372	1.65823	0.000119068	-3.59529	Up	8409
BBC3	0.0756289	1.62025	0.00599172	-4.42113	Up	8536
TBC1D4	0.227095	1.08162	0.00110538	-2.25182	Up	8594
FADS2	1.31276	0.160923	0.0100744	3.02816	Down	8617
PSIP1	0.128386	0.779912	0.00793705	-2.60283	Up	8647
BOD1L	0.17617	0.980431	0.000460893	-2.47644	Up	8677
TWF1	0.172559	1.02831	0.00920511	-2.57511	Up	8780
FAT2	0.68478	0.100608	0.00596187	2.7669	Down	8865
ABCA3	0.931848	0.274371	0.00586082	1.76397	Down	8958
REV3L	0.184206	0.750981	0.00401774	-2.02746	Up	9053
ALDH1L2	0.0370806	1.27648	2.2766e-05	-5.10536	Up	9147
MYLK	0.992854	0.163798	0.00849433	2.59966	Down	9215
ZNF260	0.114482	0.530665	0.00817913	-2.21268	Up	9383
SETX	0.166848	0.574079	0.00960497	-1.78271	Up	9389
RBM12B	0.0924076	0.543307	0.00305521	-2.55568	Up	9471
PKD2	0.084795	0.658589	0.00741926	-2.95733	Up	9591
CACNB2	0.0813784	0.688932	0.00372338	-3.08164	Up	9826
ADAT1	0.0821522	0.481621	0.00411225	-2.55153	Up	9897
FERMT1	0.431133	0.0469281	0.00341439	3.19961	Down	10295
ETNK1	0.0528005	0.373437	0.00737195	-2.82224	Up	10307
CENPF	0.0595814	0.324083	0.0074089	-2.44343	Up	10311
CAMTA1	0.0724266	0.437831	0.00875621	-2.59578	Up	10414
FNDC3B	0.0144632	0.23127	0.00777134	-3.99911	Up	11140

## Sheet: table S4
Table S4. DifferentiallyDifferently expressed genes in the wool follicle bulb during late telogen/early anagen-middle anagen transformation.
Gene Symbol	Gene expression (RPKM)		P-Value	Log2FoldChange	Regulation Direction	Rank
	Late Telogen/Early Anagen	Middle Anagen
KRT14	2489.06	1191.45	0.00960938	1.06289	Down	35
KRT5	2120.69	1017.81	0.00703044	1.05906	Down	39
KRT25	2451.84	1137.49	0.00743868	1.108	Down	40
CST3	1775.47	794.054	0.00274941	1.1609	Down	44
KRT17	1697.52	653.001	0.00374274	1.37827	Down	46
KRT27	1730.95	829.393	0.00727097	1.06144	Down	48
FABP9	1120.41	402.92	0.0011052	1.47547	Down	66
CDSN	751.516	353.046	0.00584282	1.08995	Down	79
KLK10	541.763	193.152	0.000372118	1.48793	Down	109
GSN	359.987	144.085	0.000914678	1.32103	Down	142
PRDX2	279.891	142.612	0.00996578	0.972773	Down	144
CALML5	249.444	95.9053	0.000271268	1.37903	Down	176
SELENBP1	115.553	224.231	0.00752402	-0.956428	Up	186
IVL	240.902	91.5288	0.00156519	1.39615	Down	236
CSTB	111.986	55.1472	0.0095898	1.02195	Down	337
CTSH	121.037	57.7632	0.00791238	1.06722	Down	352
S100A11	106.67	36.9848	0.00229685	1.52814	Down	368
GGACT	117.423	51.9251	0.00530599	1.17721	Down	382
RPS21	34.0334	67.6474	0.00674555	-0.991083	Up	407
SPINK5	93.986	43.2084	0.010023	1.12113	Down	530
CCL27	91.0675	30.035	0.00263014	1.60029	Down	544
LYPD5	71.5598	31.0034	0.00394895	1.20672	Down	560
SPP1	79.1411	30.798	0.00350915	1.36159	Down	593
KIAA0907	38.0006	82.5871	0.0092772	-1.1199	Up	611
C11H9orf169	12.1872	54.6918	0.000458172	-2.16596	Up	617
CRABP2	61.217	26.6295	0.00371416	1.20091	Down	638
LOR	9.2699	38.6976	0.0011434	-2.06162	Up	652
RPL38	21.5766	45.4431	0.00627667	-1.07459	Up	799
TAGLN	42.0782	14.4391	0.00023051	1.5431	Down	1000
NDUFA4L2	14.2943	31.8921	0.00948063	-1.15776	Up	1023
C15H11orf34	40.5921	15.3778	0.001739	1.40035	Down	1169
FXYD6	29.9085	14.3958	0.00814549	1.05491	Down	1186
CITED2	32.5708	14.9893	0.00936452	1.11965	Down	1200
STARD5	32.1251	12.1432	0.0010471	1.40355	Down	1247
EFHD2	27.4363	11.7391	0.00259397	1.22477	Down	1263
C1QBP	11.5004	26.5451	0.00141813	-1.20676	Up	1328
CPQ	28.8941	10.9102	0.000701277	1.4051	Down	1347
STC2	55.0371	0.382366	1.66633e-09	7.16931	Down	1393
DEGS2	18.5668	6.50939	0.00268916	1.51213	Down	1575
GPX3	24.8693	9.62004	0.00165553	1.37025	Down	1576
PADI1	24.0306	8.72226	0.000619832	1.4621	Down	1641
MT1E	5.49248	15.8267	0.00862232	-1.52683	Up	1655
AJUBA	22.3899	9.87895	0.00874418	1.18042	Down	1657
TMEM160	2.9233	17.8915	0.00051071	-2.61361	Up	1720
CSTA	18.7668	6.5456	0.00517894	1.51959	Down	1721
SMTN	19.5586	8.02032	0.00189709	1.28607	Down	1752
SPINK4	26.8442	3.94788	0.00141507	2.76546	Down	1908
SIVA1	16.9133	5.58204	0.00359893	1.5993	Down	1920
ALKBH4	15.7543	6.32078	0.00517208	1.31757	Down	1925
PACSIN3	17.6666	6.65504	0.00128154	1.40851	Down	1944
PSPH	25.384	4.86103	0.000150417	2.38458	Down	1964
GGT6	17.9831	8.01496	0.0097185	1.16588	Down	2001
PALLD	15.673	7.25535	0.00499333	1.11116	Down	2019
PHGDH	15.6227	6.63619	0.00484387	1.23522	Down	2067
AMDHD2	13.2861	4.84865	0.00168782	1.45426	Down	2224
PRDX1	13.217	5.35756	0.00713351	1.30275	Down	2289
PSAT1	19.6875	3.48113	9.08932e-05	2.49965	Down	2368
PADI4	11.7429	4.84434	0.00545266	1.27742	Down	2441
POM121C	5.2854	13.9303	0.00211553	-1.39814	Up	2508
SERPINB2	14.1181	5.88784	0.00736285	1.26173	Down	2517
S100A1	12.8309	5.27472	0.00701463	1.28246	Down	2540
TNFRSF1A	11.5437	5.12183	0.00531472	1.17238	Down	2598
PYCR1	12.7781	4.55347	0.00562189	1.48864	Down	2614
CTXN1	13.5053	3.49177	8.00891e-05	1.95149	Down	2706
NCK2	10.7396	4.04135	0.00113921	1.41003	Down	2806
DUOXA1	11.1865	3.90583	0.000641171	1.51806	Down	2940
CAPN2	9.56418	3.87415	0.00310218	1.30376	Down	2992
CLDN8	11.4705	4.63142	0.00443676	1.3084	Down	3044
RPL10A	3.25969	9.32709	0.00539854	-1.51669	Up	3056
WWTR1	9.0457	3.7723	0.0054205	1.26179	Down	3146
ARHGEF37	9.23525	3.71728	0.0067752	1.3129	Down	3168
LTBP3	8.69709	3.9986	0.00699972	1.12104	Down	3188
FSTL3	8.62888	1.77842	2.84228e-06	2.27858	Down	3246
GPR155	10.5074	4.21446	0.00378218	1.31799	Down	3290
2-Mar	8.23815	3.16883	0.00422523	1.37837	Down	3320
SRMS	8.7471	3.21407	0.00487955	1.4444	Down	3442
C23H6orf15	8.48382	3.15927	0.00651649	1.42512	Down	3605
SPNS2	6.238	2.49714	0.00891593	1.32081	Down	3616
TRIM27	7.91176	2.99891	0.0066169	1.39956	Down	3639
MYL9	7.61731	2.33382	0.0052728	1.70659	Down	3732
FOXE1	6.67213	2.19663	0.00128374	1.60285	Down	3757
ADM2	9.87015	0.927676	3.61518e-06	3.41138	Down	3864
ADH6	1.70214	7.28841	0.000288678	-2.09825	Up	3898
LSM2	8.29591	2.27019	0.00160761	1.86959	Down	3912
OSGIN1	7.01736	2.49385	0.00553746	1.49255	Down	3966
LANCL2	2.61423	6.88087	0.00483629	-1.3962	Up	4048
ARL4D	7.12162	2.35742	0.00420186	1.595	Down	4057
CCDC155	2.39344	5.11269	0.00969719	-1.095	Up	4080
PLXNA2	5.30328	2.07831	0.00291023	1.35148	Down	4239
ST6GALNAC6	4.29977	1.9761	0.0103708	1.1216	Down	4417
CXCR4	5.75148	1.539	0.000986567	1.90194	Down	4548
SCNN1A	4.64389	2.02129	0.00943649	1.20006	Down	4724
UGDH	5.48601	1.90188	0.00212144	1.52834	Down	4832
PYGB	4.83514	1.60329	0.000687856	1.59252	Down	4851
VAX2	4.51807	0.806733	0.00100584	2.48554	Down	4860
FAM20A	2.11988	4.79104	0.0066733	-1.17636	Up	4872
LIPK	4.73742	1.32604	0.00380108	1.83698	Down	4874
CABYR	2.13811	4.71147	0.00623786	-1.13984	Up	5150
CSRP2	5.86047	0.182425	1.70936e-06	5.00564	Down	5195
MYADM	4.04695	1.30037	0.00248226	1.63792	Down	5233
KIAA1432	1.64701	3.5617	0.00485896	-1.11272	Up	5295
ABCB9	3.96614	1.20918	0.00125805	1.7137	Down	5356
KITLG	0.521569	4.59969	0.00214697	-3.14061	Up	5390
GYPC	3.6498	0.742719	0.000957794	2.29693	Down	5498
SLC4A1	3.64397	1.3498	0.00932276	1.43277	Down	5595
CMAS	3.67527	0.901227	0.00179086	2.02789	Down	5602
FAM188B	3.3571	1.06384	0.00896421	1.65793	Down	5725
S1PR3	1.21912	3.39469	0.00299577	-1.47744	Up	5945
OSBPL5	2.8848	0.728714	0.0002181	1.98505	Down	6040
CCDC23	3.56066	0.455996	0.00641559	2.96505	Down	6061
MYO1B	3.04188	1.30803	0.0103709	1.21757	Down	6081
LRWD1	2.63146	0.757082	0.00690923	1.79734	Down	6201
FAM53B	2.26429	0.624416	0.0051721	1.85848	Down	6274
SERPING1	3.2988	0.722864	0.00245928	2.19014	Down	6296
MANSC1	2.84788	0.858713	0.00887886	1.72964	Down	6360
H19	3.4817	0.184115	0.000471032	4.24111	Down	6412
RHBDF1	2.47657	0.848008	0.00432829	1.54619	Down	6418
CTF1	4.34351	0.113966	0.00183847	5.25218	Down	6422
WNK4	2.17852	0.827611	0.0101218	1.39632	Down	6467
PARP10	2.62395	0.961712	0.0053633	1.44806	Down	6490
FXN	0.708104	2.64014	0.00473242	-1.89858	Up	6522
CLDN3	3.28521	0.60453	0.00113109	2.4421	Down	6546
PQLC3	2.27788	0.639176	0.00581269	1.83341	Down	6558
MAP3K9	2.26651	0.750535	0.00404405	1.59448	Down	6611
SDHAF1	2.88193	0.388835	0.00428348	2.88981	Down	6613
HOXB2	0.47126	2.47215	0.00151296	-2.39117	Up	6665
PCP4	2.63551	0.199693	0.0101927	3.72223	Down	6673
C26H10orf95	0.690878	2.69638	0.00452174	-1.96452	Up	6894
C19H17orf70	1.7147	0.439949	0.00223589	1.96255	Down	6906
MAP2K1	2.30875	0.529282	0.00143979	2.125	Down	6965
PMP2	2.68334	0.474086	0.00294586	2.50081	Down	7055
TMPRSS11F	2.21695	0.482928	0.00674501	2.1987	Down	7126
HSPA6	0.422665	2.66449	0.00168855	-2.65628	Up	7128
CHST10	1.82437	0.327069	0.00129341	2.47973	Down	7147
MASP2	0.762821	2.30621	0.00157059	-1.59611	Up	7159
VLDLR	2.09452	0.577779	0.00505947	1.85803	Down	7276
NRP1	1.94722	0.59668	0.00338289	1.70639	Down	7429
FAM178B	2.33406	0.415138	0.000932575	2.49118	Down	7479
PCK2	2.18831	0.311862	0.00077218	2.81084	Down	7552
HSD17B6	1.71844	0.344194	0.00824401	2.3198	Down	7561
EXOSC8	0.248987	2.14847	0.00974129	-3.10916	Up	7692
HS3ST1	1.7108	0.241401	0.00576479	2.82517	Down	7703
SLC35C1	1.3535	0.349116	0.00668433	1.95491	Down	7824
ZNF341	1.5628	0.375438	0.00769458	2.05748	Down	8065
MAPK8IP3	1.34586	0.352794	0.00150257	1.93163	Down	8083
IRX5	1.39471	0.354165	0.00476151	1.97747	Down	8089
LDLR	0.329035	1.22408	0.00457119	-1.89539	Up	8094
PAQR6	1.07039	0.224648	0.0050717	2.2524	Down	8182
ZFPM1	0.704139	0.0753742	0.0014196	3.22372	Down	8199
CIST1	0.993225	1e-07	0.0093205	23.2437	Down	8220
NEXN	1.65823	0.260934	0.000427573	2.66789	Down	8409
PVR	0.154451	1.3044	0.000367819	-3.07816	Up	8435
RTN2	1.04299	0.103591	0.00387972	3.33176	Down	8516
MESDC1	0.780879	1e-07	0.000417065	22.8967	Down	8566
IQSEC1	1.26964	0.268386	0.00954751	2.24203	Down	8648
IZUMO1	1.51302	0.101305	0.000482122	3.90065	Down	8657
IL34	1.33112	0.097795	0.000122268	3.76673	Down	8808
SYNDIG1	1.0677	0.219725	0.00292619	2.28074	Down	8857
FAT2	0.100608	0.873576	0.00116663	-3.11819	Up	8865
TMC7	0.988412	0.244948	0.00509397	2.01264	Down	8896
TSPAN4	0.900361	0.14763	0.00379512	2.60852	Down	9001
VAT1L	0.0951716	1.14419	0.00587922	-3.58766	Up	9006
SNX24	0.813845	0.0784266	0.00370551	3.37534	Down	9071
ALDH1L2	1.27648	0.111257	6.48952e-05	3.5202	Down	9147
REC8	1.06332	0.0513354	0.00329082	4.37248	Down	9148
FOXL1	0.774092	0.100502	0.00579848	2.94528	Down	9172
BOLA-DQA5	1.35145	1e-07	0.000903855	23.688	Down	9242
LTB4R	0.992496	0.0704799	0.00776485	3.81578	Down	9325
UPK1B	0.831167	0.0689274	0.00559867	3.59199	Down	9336
LRP4	0.728408	0.146266	0.00455615	2.31615	Down	9396
PRRG1	0.657852	0.0655508	0.00105627	3.32708	Down	9907
SATB1	0.575575	0.0699936	0.0015197	3.03971	Down	9933
FLVCR2	0.41635	0.0762011	0.0078988	2.44991	Down	10018
SERPINE1	0.521789	0.0204314	0.000976121	4.67461	Down	10028
COL14A1	0.555287	0.0535742	0.00102283	3.37362	Down	10093
SLC29A4	0.513978	0.0361495	0.00788867	3.82966	Down	10213
WISP2	0.69914	1e-07	0.00250998	22.7372	Down	10397
PRSS48	0.490514	1e-07	0.00403841	22.2259	Down	10767
DUOX2	0.36419	0.0521137	0.00872192	2.80496	Down	10768
LINGO1	0.319599	0.0239329	0.00657293	3.7392	Down	10850
GCK	0.339956	1e-07	0.00733524	21.6969	Down	11001
MUC6	0.37227	1e-07	0.00571252	21.8279	Down	11015
TICRR	0.186881	1e-07	0.00291581	20.8337	Down	11791

## Sheet: table S5
Table S5. Annotated KRT and KRTAP genes expressed in wool follicle bulb of sheep.
KRTs						KRTAPs
Gene Symbol	Gene Expression (RPKM)			Rank		Gene Symbol	Gene Expression (RPKM)			Rank
	Middle Anagen	Catagen	Late Telogen/Early Anagen				Middle Anagen	Catagen	Late Telogen/Early Anagen
KRT34	27184	22684.6	20733.2	7		KRTAP3-1	112488	113352	94180.9	1
KRT31	17371	20075.3	16376.9	8		KRTAP8-1	56504.8	88107.9	102580	2
KRT83	12656.6	15698.3	12235	10		KRTAP3-3	41576.6	35861.9	30707.1	3
KRT33A	11095.7	11742.7	10361.9	12		KRTAP11-1	33752.8	39855.9	29019.5	4
KRT81	5968.15	6383.19	4381.67	17		KRTAP7-1	26983.2	32520.8	29912.5	5
KRT86	5238.38	6463.96	4958.23	18		KRTAP1-1	25607.2	27718.6	23067.2	6
KRT85	4948.8	5949.22	3954.41	20		KRTAP13-1	21205.7	10454.5	17439.5	9
KRT71	1429.97	1989.94	2650.1	34		KRTAP3-2	10122.5	8470.09	6058.36	15
KRT14	1191.45	2204.1	2489.06	35		KRTAP9-2	9838.09	5712.64	5576.81	16
KRT5	1017.81	1492.33	2120.69	39		KRTAP15-1	4939.18	6043.12	5215.85	19
KRT25	1137.49	1034.62	2451.84	40		KRTAP26-1	1693.01	2052.35	2628.85	30
KRT17	653.001	1559.42	1697.52	46		KRTAP12-2	1593.06	1675.16	1742.09	37
KRT35	1608.1	1263.6	971.227	47		KRTAP9-7	1536.43	964.157	1177.94	49
KRT27	829.393	1149.58	1730.95	48		KRTAP16-1	1007.63	826.954	1138.74	54
KRT39	926.818	563.058	673.383	63		KRTAP27-1	710.143	843.891	758.682	59
KRT75	360.97	785.535	749.882	71		KRTAP4-12	887.777	680.408	512.435	64
KRT38	718.766	521.907	581.901	74		KRTAP10-11	588.162	661.034	735.891	67
KRT72	406.164	410.849	581.359	86		KRTAP4-7	773.839	710.199	479.821	68
KRT6A	237.162	329.378	383.938	113		KRTAP10-8	409.272	594.421	623.148	81
KRT32	221.364	239.745	290.479	135		KRTAP10-12	243.411	319.644	297.593	121
KRT80	147.877	180.368	187.034	191		KRTAP17-1	240.473	299.691	266.222	128
KRT84	85.8751	239.833	167.568	198		KRTAP24-1	148.427	164.485	267.246	173
KRT23	90.2881	142.722	184.608	235		KRTAP4-1	184.656	138.787	128.297	215
KRT26	134.78	87.2381	190.956	237		KRTAP13-2	190.562	108.873	91.0283	248
KRT28	127.825	101.972	149.216	257		KRTCAP2	104.437	136.148	120.876	266
KRT82	111.51	143.121	123.751	258		KRTAP10-2	62.8713	104.891	110.934	335
KRT40	102.384	112.572	115.593	285		KRTAP10-7	38.1116	59.0258	57.3395	580
KRT36	125.023	87.4619	110.137	292		KRTDAP	15.9928	28.1725	16.8491	1298
KRT73	67.6737	44.0238	55.2875	539		KRTCAP3	2.06279	1.05686	1.54923	6500
KRT6C	24.3657	62.4028	52.5991	645		KRTAP13-3	2.76147	0.819258	0.453615	6877
KRT74	20.9806	27.9959	40.5842	954
KRT16	10.9103	20.6111	21.6001	1465
KRT15	14.8323	22.972	13.1369	1527
KRT6B	11.967	20.8339	17.6032	1550
KRT1	11.6421	11.3401	6.68998	2300
KRT19	5.72191	14.1616	9.4247	2323
KRT9	1.83425	14.3381	8.92458	2596
KRT10	8.77314	11.4089	4.22082	2642
KRT7	6.50854	8.91156	8.30094	2693
KRT79	5.51495	2.97316	2.17064	4457
KRT77	3.07496	6.12121	1.30873	4490
KRT13	2.49645	1.83131	0.586682	6368
KRT2	1.79109	1.76972	0.776303	6682
KRT8	0.257054	1.07544	0.813084	8315
KRT78	1.00119	0.599445	0.437697	8425
KRT18	0.236926	0.0706599	0.156794	10956
KRT12	0	0	0.285027	11584
KRT3	0.036376	0	0.191476	11828
KRT4	0.0637917	0.0496315	0.111929	11842
KRT24	0.0380095	0.0567678	0.0629839	12260
KRT222	0	0.0751814	0.0400308	12602
KRT76	0	0.0358441	0	13540

## Sheet: table S6
Table S6. GO analysis of downregulated genes in the wool follicle bulb during middle anagen-catagen transformation.
ID	Term	Count	%	Genes
GO:0045449	regulation of transcription	59	19.5364	ZNF292, MEF2A, RSF1, ARID4A, TMF1, PNN, ESF1, MLL5, CASP8AP2, MIER1, BRD7, PSIP1, USP16, TOPORS, CDC5L, MED13, GTF2H2, SLTM, BRWD1, RFC1, BPTF, ASCC3, ASH1L, MGA, MYNN, RNF20, LRPPRC, SUV420H1, BTAF1, BDP1, ZNF131, PRKDC, CHD9, TCERG1, ZNF326, RB1CC1, CEBPZ, NFAT5, LEO1, CHD1, BAZ2B, MYSM1, ZNF605, ZNF260, ZBTB41, AFF4, CENPF, MALT1, ZBTB43, GCFC1, RLF, ATRX, DMTF1, TRPS1, SFPQ, RBAK, JAK2, SETD2…
GO:0006350	transcription	52	17.2185	MEF2A, ZNF292, RSF1, ARID4A, TMF1, PNN, ESF1, MLL5, CASP8AP2, MIER1, PSIP1, USP16, CDC5L, MED13, TOPORS, GTF2H2, SLTM, BRWD1, RFC1, BPTF, ASCC3, ASH1L, MGA, MYNN, LRPPRC, SUV420H1, BDP1, ZNF131, CHD9, TCERG1, ZNF326, RB1CC1, NFAT5, CEBPZ, LEO1, BAZ2B, TRIP11, MYSM1, ZNF605, ZNF260, AFF4, ZBTB41, ZBTB43, GCFC1, RLF, PHF3, DMTF1, TRPS1, SFPQ, RBAK, SETD2, ZBTB1
GO:0007049	cell cycle	30	9.93377	ZAK, USP9X, LRRCC1, LATS1, CD2AP, MLL5, CUL5, NIPBL, CASP8AP2, MACF1, RB1CC1, USP16, DNAJC2, APC, ESCO1, PDS5A, CCPG1, CKAP5, CENPF, UBR2, CDC5L, TET2, SMC3, RAD50, SMC4, ERBB2IP, DMTF1, CLIP1, SMC1A, MPHOSPH8
GO:0006396	RNA processing	29	9.60265	PRPF4B, CRNKL1, RBM6, ZNF638, SETX, PNN, ADAT1, ZFC3H1, SF3B1, DDX17, DDX46, INTS4, ZCCHC6, RBM25, LUC7L3, PRPF40A, PABPN1, YTHDC1, PRPF39, SSB, CDC5L, PPIG, LARP7, SFPQ, THOC2, HNRNPH1, SMC1A, PRPF38B, THOC1
GO:0051276	chromosome organization	26	8.60927	RSF1, ARID4A, PRKDC, LATS1, CHD9, MLL5, NIPBL, CHD1, LEO1, USP16, MYSM1, APC, SMCHD1, CENPF, SMC3, RAD50, SMC4, CTR9, BPTF, RFC1, ASH1L, SMC1A, SETD2, RNF20, MPHOSPH8, SUV420H1
GO:0046907	intracellular transport	26	8.60927	MYO5A, SEC24B, NUP98, EEA1, SEC63, SSR1, MACF1, PIKFYVE, VPS13A, RANBP2, TPR, PABPN1, UPF2, HSP90AA1, KIF5B, NUDT4, EXPH5, MALT1, ERBB2IP, IPO7, TRPS1, JAK2, SYTL2, THOC2, LRPPRC, THOC1
GO:0044265	cellular macromolecule catabolic process	26	8.60927	USP8, USP9X, CD2AP, CUL5, RANBP2, USP16, USP34, MYSM1, KLHL20, HECTD1, PAN2, UPF2, BIRC6, UBR2, MALT1, UBR1, TOPORS, GTF2H2, RNF43, HSP90B1, USP47, USP48, RNF20, USP24, FBXO11, RNF111
GO:0009057	macromolecule catabolic process	26	8.60927	USP8, USP9X, CD2AP, CUL5, RANBP2, USP16, USP34, MYSM1, KLHL20, HECTD1, PAN2, UPF2, BIRC6, UBR2, MALT1, UBR1, TOPORS, GTF2H2, RNF43, HSP90B1, USP47, USP48, RNF20, USP24, FBXO11, RNF111
GO:0006508	proteolysis	26	8.60927	USP8, MASP2, USP9X, CD2AP, CUL5, RANBP2, USP16, USP34, MYSM1, KLHL20, NSF, HECTD1, PAN2, BIRC6, UBR2, MALT1, TOPORS, UBR1, RNF43, HSP90B1, USP47, USP48, RNF20, USP24, FBXO11, RNF111
GO:0008104	protein localization	25	8.27815	SEC24B, NUP98, SEC63, SSR1, MIA3, VPS13C, MACF1, PIKFYVE, VPS13A, VPS13B, RANBP2, TPR, NSF, EXPH5, CENPF, TOPORS, TNKS2, RAB11FIP2, HSP90B1, ERBB2IP, RABEP1, IPO7, TRPS1, SYTL2, JAK2
GO:0043632	modification-dependent macromolecule catabolic process	24	7.94702	PAN2, USP8, USP9X, BIRC6, MALT1, UBR2, UBR1, TOPORS, CD2AP, RNF43, HSP90B1, CUL5, USP47, USP48, RANBP2, USP34, USP16, USP24, RNF20, MYSM1, KLHL20, FBXO11, HECTD1, RNF111
GO:0019941	modification-dependent protein catabolic process	24	7.94702	PAN2, USP8, USP9X, BIRC6, MALT1, UBR2, UBR1, TOPORS, CD2AP, RNF43, HSP90B1, CUL5, USP47, USP48, RANBP2, USP34, USP16, USP24, RNF20, MYSM1, KLHL20, FBXO11, HECTD1, RNF111
GO:0051603	proteolysis involved in cellular protein catabolic process	24	7.94702	PAN2, USP8, USP9X, BIRC6, MALT1, UBR2, UBR1, TOPORS, CD2AP, RNF43, HSP90B1, CUL5, USP47, USP48, RANBP2, USP34, USP16, USP24, RNF20, MYSM1, KLHL20, FBXO11, HECTD1, RNF111
GO:0044257	cellular protein catabolic process	24	7.94702	PAN2, USP8, USP9X, BIRC6, MALT1, UBR2, UBR1, TOPORS, CD2AP, RNF43, HSP90B1, CUL5, USP47, USP48, RANBP2, USP34, USP16, USP24, RNF20, MYSM1, KLHL20, FBXO11, HECTD1, RNF111
GO:0030163	protein catabolic process	24	7.94702	PAN2, USP8, USP9X, BIRC6, MALT1, UBR2, UBR1, TOPORS, CD2AP, RNF43, HSP90B1, CUL5, USP47, USP48, RANBP2, USP34, USP16, USP24, RNF20, MYSM1, KLHL20, FBXO11, HECTD1, RNF111
GO:0016071	mRNA metabolic process	21	6.95364	PABPN1, PAN2, UPF2, PRPF4B, CRNKL1, YTHDC1, PRPF39, SSB, CDC5L, PNN, SF3B1, DDX46, SFPQ, THOC2, HNRNPH1, SMC1A, PRPF38B, RBM25, LUC7L3, THOC1, PRPF40A
GO:0006259	DNA metabolic process	21	6.95364	ESCO1, NUP98, CENPF, SMC6, PRKDC, RAD50, GTF2H2, SMC3, SETX, ATRX, TOP1, MLL5, SLK, RFC1, SFPQ, PSIP1, PARP4, TOP2B, SMC1A, DNAJC2, REV3L
GO:0022402	cell cycle process	21	6.95364	PDS5A, ZAK, CKAP5, USP9X, LRRCC1, CENPF, UBR2, CD2AP, LATS1, RAD50, SMC3, SMC4, MLL5, CUL5, NIPBL, MACF1, CLIP1, USP16, SMC1A, DNAJC2, APC
GO:0033554	cellular response to stress	21	6.95364	ESCO1, ZAK, SMC6, PRKDC, TOPORS, RAD50, GTF2H2, SMC3, SETX, ATRX, UACA, SLK, RFC1, RB1CC1, SFPQ, GAB1, JAK2, PARP4, SMC1A, APC, REV3L
GO:0015031	protein transport	21	6.95364	SEC24B, NUP98, EXPH5, CENPF, SEC63, SSR1, RAB11FIP2, MIA3, HSP90B1, MACF1, RABEP1, ERBB2IP, IPO7, TRPS1, VPS13A, JAK2, SYTL2, VPS13B, RANBP2, TPR, NSF
GO:0045184	establishment of protein localization	21	6.95364	SEC24B, NUP98, EXPH5, CENPF, SEC63, SSR1, RAB11FIP2, MIA3, HSP90B1, MACF1, RABEP1, ERBB2IP, IPO7, TRPS1, VPS13A, JAK2, SYTL2, VPS13B, RANBP2, TPR, NSF
GO:0008380	RNA splicing	20	6.62252	PABPN1, PRPF4B, CRNKL1, YTHDC1, PRPF39, ZNF638, CDC5L, PNN, SF3B1, PPIG, DDX46, SFPQ, THOC2, HNRNPH1, SMC1A, PRPF38B, RBM25, LUC7L3, PRPF40A, THOC1
GO:0008219	cell death	19	6.29139	MEF2A, ROCK1, ZAK, BIRC6, PRKDC, TOPORS, ITSN1, SETX, SLTM, TOP1, CASP8AP2, SLK, RABEP1, BNIP1, TIA1, JAK2, PARP4, LUC7L3, THOC1
GO:0016265	death	19	6.29139	MEF2A, ROCK1, ZAK, BIRC6, PRKDC, TOPORS, ITSN1, SETX, SLTM, TOP1, CASP8AP2, SLK, RABEP1, BNIP1, TIA1, JAK2, PARP4, LUC7L3, THOC1
GO:0006397	mRNA processing	18	5.96026	PABPN1, PRPF4B, CRNKL1, YTHDC1, PRPF39, CDC5L, PNN, SF3B1, DDX46, SFPQ, THOC2, HNRNPH1, SMC1A, PRPF38B, RBM25, LUC7L3, PRPF40A, THOC1
GO:0006974	response to DNA damage stimulus	18	5.96026	ESCO1, ZAK, SMC6, PRKDC, TOPORS, RAD50, GTF2H2, SMC3, SETX, ATRX, UACA, SLK, RFC1, SFPQ, PARP4, SMC1A, REV3L, APC
GO:0022403	cell cycle phase	18	5.96026	PDS5A, CKAP5, USP9X, LRRCC1, CENPF, UBR2, CD2AP, LATS1, RAD50, SMC3, SMC4, CUL5, NIPBL, CLIP1, USP16, SMC1A, DNAJC2, APC
GO:0065003	macromolecular complex assembly	18	5.96026	NUP98, RSF1, HSP90AA1, BRAF, CRNKL1, CENPF, AASS, EPRS, MALT1, MED13, CD2AP, GTF2H2, CTTNBP2, EIF3A, IPO7, USP16, MDN1, APC
GO:0043933	macromolecular complex subunit organization	18	5.96026	NUP98, RSF1, HSP90AA1, BRAF, CRNKL1, CENPF, AASS, EPRS, MALT1, MED13, CD2AP, GTF2H2, CTTNBP2, EIF3A, IPO7, USP16, MDN1, APC
GO:0000279	M phase	16	5.29801	PDS5A, CKAP5, USP9X, LRRCC1, CENPF, UBR2, CD2AP, LATS1, SMC3, RAD50, SMC4, NIPBL, CLIP1, USP16, SMC1A, APC
GO:0000278	mitotic cell cycle	16	5.29801	PDS5A, CKAP5, USP9X, LRRCC1, CENPF, CD2AP, LATS1, SMC3, SMC4, CUL5, NIPBL, CLIP1, USP16, SMC1A, DNAJC2, APC
GO:0034613	cellular protein localization	16	5.29801	SEC24B, NUP98, EXPH5, TOPORS, SEC63, SSR1, TNKS2, MACF1, ERBB2IP, IPO7, TRPS1, PIKFYVE, SYTL2, JAK2, RANBP2, TPR
GO:0070727	cellular macromolecule localization	16	5.29801	SEC24B, NUP98, EXPH5, TOPORS, SEC63, SSR1, TNKS2, MACF1, ERBB2IP, IPO7, TRPS1, PIKFYVE, SYTL2, JAK2, RANBP2, TPR
GO:0070271	protein complex biogenesis	16	5.29801	NUP98, RSF1, HSP90AA1, BRAF, CENPF, AASS, EPRS, MALT1, MED13, CD2AP, GTF2H2, CTTNBP2, IPO7, USP16, MDN1, APC
GO:0006461	protein complex assembly	16	5.29801	NUP98, RSF1, HSP90AA1, BRAF, CENPF, AASS, EPRS, MALT1, MED13, CD2AP, GTF2H2, CTTNBP2, IPO7, USP16, MDN1, APC
GO:0012501	programmed cell death	16	5.29801	MEF2A, ROCK1, BIRC6, PRKDC, TOPORS, ITSN1, SLTM, TOP1, SLK, RABEP1, BNIP1, CASP8AP2, TIA1, JAK2, LUC7L3, THOC1
GO:0006511	ubiquitin-dependent protein catabolic process	15	4.96689	PAN2, USP8, USP9X, UBR2, UBR1, CD2AP, CUL5, HSP90B1, USP47, USP48, USP16, USP34, RNF20, USP24, FBXO11
GO:0051301	cell division	15	4.96689	PDS5A, ROCK1, ROCK2, CKAP5, USP9X, LRRCC1, CENPF, CD2AP, LATS1, SMC3, SMC4, TOP1, USP16, SMC1A, APC
GO:0006325	chromatin organization	15	4.96689	RSF1, ARID4A, CTR9, CHD9, MLL5, BPTF, ASH1L, CHD1, LEO1, USP16, SETD2, RNF20, MPHOSPH8, MYSM1, SUV420H1
GO:0007067	mitosis	14	4.63576	PDS5A, CKAP5, USP9X, LRRCC1, CENPF, CD2AP, LATS1, SMC3, SMC4, NIPBL, CLIP1, USP16, SMC1A, APC
GO:0000280	nuclear division	14	4.63576	PDS5A, CKAP5, USP9X, LRRCC1, CENPF, CD2AP, LATS1, SMC3, SMC4, NIPBL, CLIP1, USP16, SMC1A, APC
GO:0000087	M phase of mitotic cell cycle	14	4.63576	PDS5A, CKAP5, USP9X, LRRCC1, CENPF, CD2AP, LATS1, SMC3, SMC4, NIPBL, CLIP1, USP16, SMC1A, APC
GO:0048285	organelle fission	14	4.63576	PDS5A, CKAP5, USP9X, LRRCC1, CENPF, CD2AP, LATS1, SMC3, SMC4, NIPBL, CLIP1, USP16, SMC1A, APC
GO:0006281	DNA repair	14	4.63576	ESCO1, PRKDC, SMC6, GTF2H2, SMC3, RAD50, SETX, ATRX, SLK, RFC1, SFPQ, PARP4, SMC1A, REV3L
GO:0016568	chromatin modification	13	4.30464	RSF1, CTR9, CHD9, MLL5, BPTF, ASH1L, CHD1, LEO1, USP16, SETD2, RNF20, MYSM1, SUV420H1
GO:0006351	transcription, DNA-dependent	13	4.30464	RSF1, ARID4A, AFF4, MED13, GTF2H2, TMF1, TCERG1, TRPS1, ASH1L, CEBPZ, NFAT5, MYNN, TRIP11
GO:0032774	RNA biosynthetic process	13	4.30464	RSF1, ARID4A, AFF4, MED13, GTF2H2, TMF1, TCERG1, TRPS1, ASH1L, CEBPZ, NFAT5, MYNN, TRIP11
GO:0006886	intracellular protein transport	13	4.30464	SEC24B, NUP98, EXPH5, SEC63, SSR1, ERBB2IP, MACF1, IPO7, TRPS1, SYTL2, JAK2, RANBP2, TPR
GO:0006913	nucleocytoplasmic transport	11	3.64238	PABPN1, NUP98, UPF2, IPO7, TRPS1, MALT1, JAK2, RANBP2, THOC2, TPR, THOC1
GO:0051169	nuclear transport	11	3.64238	PABPN1, NUP98, UPF2, IPO7, TRPS1, MALT1, JAK2, RANBP2, THOC2, TPR, THOC1
GO:0006366	transcription from RNA polymerase II promoter	11	3.64238	TCERG1, ARID4A, TRPS1, ASH1L, NFAT5, AFF4, CEBPZ, MED13, TRIP11, GTF2H2, TMF1
GO:0043066	negative regulation of apoptosis	11	3.64238	SON, HSP90B1, ROCK1, BNIP1, BRAF, RB1CC1, BIRC6, NOS3, MALT1, ITSN1, APC
GO:0043069	negative regulation of programmed cell death	11	3.64238	SON, HSP90B1, ROCK1, BNIP1, BRAF, RB1CC1, BIRC6, NOS3, MALT1, ITSN1, APC
GO:0060548	negative regulation of cell death	11	3.64238	SON, HSP90B1, ROCK1, BNIP1, BRAF, RB1CC1, BIRC6, NOS3, MALT1, ITSN1, APC
GO:0050658	RNA transport	10	3.31126	PABPN1, NUP98, UPF2, CKAP5, FMR1, RANBP2, THOC2, TPR, LRPPRC, THOC1
GO:0050657	nucleic acid transport	10	3.31126	PABPN1, NUP98, UPF2, CKAP5, FMR1, RANBP2, THOC2, TPR, LRPPRC, THOC1
GO:0051236	establishment of RNA localization	10	3.31126	PABPN1, NUP98, UPF2, CKAP5, FMR1, RANBP2, THOC2, TPR, LRPPRC, THOC1
GO:0006403	RNA localization	10	3.31126	PABPN1, NUP98, UPF2, CKAP5, FMR1, RANBP2, THOC2, TPR, LRPPRC, THOC1
GO:0015931	nucleobase, nucleoside, nucleotide and nucleic acid transport	10	3.31126	PABPN1, NUP98, UPF2, CKAP5, FMR1, RANBP2, THOC2, TPR, LRPPRC, THOC1
GO:0006457	protein folding	10	3.31126	HSP90B1, HSP90AA1, PPIG, HSPA4L, PPIL4, DNAJC21, RANBP2, DNAJC2, SEC63, NKTR
GO:0006605	protein targeting	10	3.31126	NUP98, MACF1, ERBB2IP, IPO7, TRPS1, JAK2, RANBP2, TPR, SEC63, SSR1
GO:0007017	microtubule-based process	10	3.31126	CTTNBP2, KIF5B, MACF1, CKAP5, KTN1, PCM1, KIF21A, SMC1A, SMC3, LRPPRC
GO:0051028	mRNA transport	9	2.98013	PABPN1, NUP98, UPF2, FMR1, RANBP2, THOC2, TPR, LRPPRC, THOC1
GO:0033365	protein localization in organelle	9	2.98013	NUP98, MACF1, IPO7, TRPS1, PIKFYVE, JAK2, TOPORS, RANBP2, TPR
GO:0033043	regulation of organelle organization	9	2.98013	CTTNBP2, MACF1, NEB, ROCK2, CENPF, TPR, LATS1, TNKS2, APC
GO:0034504	protein localization in nucleus	8	2.64901	NUP98, IPO7, TRPS1, PIKFYVE, JAK2, TOPORS, RANBP2, TPR
GO:0016570	histone modification	8	2.64901	MLL5, LEO1, SETD2, USP16, RNF20, MYSM1, SUV420H1, CTR9
GO:0016569	covalent chromatin modification	8	2.64901	MLL5, LEO1, SETD2, USP16, RNF20, MYSM1, SUV420H1, CTR9
GO:0043434	response to peptide hormone stimulus	8	2.64901	PHIP, CTTNBP2, GAB1, PRKDC, NOS3, JAK2, ABCC5, PIK3R1
GO:0070647	protein modification by small protein conjugation or removal	8	2.64901	USP9X, LEO1, USP16, RNF20, MYSM1, CTR9, HECTD1, FBXO11
GO:0007059	chromosome segregation	7	2.31788	NIPBL, USP9X, CENPF, SMC1A, LATS1, SMC3, SMC4
GO:0051789	response to protein stimulus	7	2.31788	HSPH1, HSP90AA1, HSPA4L, HSPA6, SETD2, TTC3, CYR61
GO:0000375	RNA splicing, via transesterification reactions	7	2.31788	PABPN1, SF3B1, CRNKL1, YTHDC1, HNRNPH1, SMC1A, RBM25
GO:0000398	nuclear mRNA splicing, via spliceosome	7	2.31788	PABPN1, SF3B1, CRNKL1, YTHDC1, HNRNPH1, SMC1A, RBM25
GO:0000377	RNA splicing, via transesterification reactions with bulged adenosine as nucleophile	7	2.31788	PABPN1, SF3B1, CRNKL1, YTHDC1, HNRNPH1, SMC1A, RBM25
GO:0030334	regulation of cell migration	7	2.31788	MIA3, ARHGAP5, GAB1, JAK2, RNF20, PIK3R1, APC
GO:0043414	biopolymer methylation	6	1.98675	ATRX, MLL5, METTL3, SETD2, RNF20, SUV420H1
GO:0032259	methylation	6	1.98675	ATRX, MLL5, METTL3, SETD2, RNF20, SUV420H1
GO:0006606	protein import into nucleus	6	1.98675	NUP98, IPO7, TRPS1, JAK2, RANBP2, TPR
GO:0051170	nuclear import	6	1.98675	NUP98, IPO7, TRPS1, JAK2, RANBP2, TPR
GO:0006310	DNA recombination	6	1.98675	ATRX, SFPQ, PSIP1, SMC6, PRKDC, RAD50
GO:0006730	one-carbon metabolic process	6	1.98675	ATRX, MLL5, METTL3, SETD2, RNF20, SUV420H1
GO:0017038	protein import	6	1.98675	NUP98, IPO7, TRPS1, JAK2, RANBP2, TPR
GO:0032870	cellular response to hormone stimulus	6	1.98675	PHIP, GAB1, PRKDC, JAK2, LATS1, PIK3R1
GO:0051493	regulation of cytoskeleton organization	6	1.98675	CTTNBP2, MACF1, NEB, ROCK2, LATS1, APC
GO:0051168	nuclear export	5	1.65563	PABPN1, UPF2, MALT1, THOC2, THOC1
GO:0030335	positive regulation of cell migration	5	1.65563	MIA3, ARHGAP5, JAK2, PIK3R1, APC
GO:0000075	cell cycle checkpoint	5	1.65563	ZAK, CENPF, TPR, SMC1A, APC
GO:0051272	positive regulation of cell motion	5	1.65563	MIA3, ARHGAP5, JAK2, PIK3R1, APC
GO:0040017	positive regulation of locomotion	5	1.65563	MIA3, ARHGAP5, JAK2, PIK3R1, APC
GO:0032868	response to insulin stimulus	5	1.65563	PHIP, GAB1, PRKDC, ABCC5, PIK3R1
GO:0007050	cell cycle arrest	5	1.65563	CUL5, MLL5, ZAK, MACF1, APC
GO:0016571	histone methylation	4	1.3245	MLL5, SETD2, RNF20, SUV420H1
GO:0006406	mRNA export from nucleus	4	1.3245	PABPN1, UPF2, THOC2, THOC1
GO:0000819	sister chromatid segregation	4	1.3245	NIPBL, SMC1A, LATS1, SMC4
GO:0008213	protein amino acid alkylation	4	1.3245	MLL5, SETD2, RNF20, SUV420H1
GO:0006479	protein amino acid methylation	4	1.3245	MLL5, SETD2, RNF20, SUV420H1
GO:0006405	RNA export from nucleus	4	1.3245	PABPN1, UPF2, THOC2, THOC1
GO:0070507	regulation of microtubule cytoskeleton organization	4	1.3245	CTTNBP2, MACF1, ROCK2, APC
GO:0032886	regulation of microtubule-based process	4	1.3245	CTTNBP2, MACF1, ROCK2, APC
GO:0030705	cytoskeleton-dependent intracellular transport	4	1.3245	MYO5A, KIF5B, MACF1, LRPPRC
GO:0006944	membrane fusion	4	1.3245	MFN1, BNIP1, RABEP1, EEA1
GO:0010390	histone monoubiquitination	3	0.993377	LEO1, RNF20, CTR9
GO:0033523	histone H2B ubiquitination	3	0.993377	LEO1, RNF20, CTR9
GO:0006513	protein monoubiquitination	3	0.993377	LEO1, RNF20, CTR9
GO:0007094	mitotic cell cycle spindle assembly checkpoint	3	0.993377	CENPF, TPR, APC
GO:0007062	sister chromatid cohesion	3	0.993377	NIPBL, SMC1A, SMC3
GO:0045841	negative regulation of mitotic metaphase/anaphase transition	3	0.993377	CENPF, TPR, APC
GO:0051784	negative regulation of nuclear division	3	0.993377	CENPF, TPR, APC
GO:0031577	spindle checkpoint	3	0.993377	CENPF, TPR, APC
GO:0045839	negative regulation of mitosis	3	0.993377	CENPF, TPR, APC
GO:0016574	histone ubiquitination	3	0.993377	LEO1, RNF20, CTR9
GO:0048284	organelle fusion	3	0.993377	MFN1, BNIP1, EEA1
GO:0030071	regulation of mitotic metaphase/anaphase transition	3	0.993377	CENPF, TPR, APC
GO:0010948	negative regulation of cell cycle process	3	0.993377	CENPF, TPR, APC
GO:0016579	protein deubiquitination	3	0.993377	USP9X, USP16, MYSM1
GO:0000723	telomere maintenance	3	0.993377	RFC1, PRKDC, RAD50
GO:0070646	protein modification by small protein removal	3	0.993377	USP9X, USP16, MYSM1
GO:0032200	telomere organization	3	0.993377	RFC1, PRKDC, RAD50
GO:0010970	microtubule-based transport	3	0.993377	KIF5B, MACF1, LRPPRC
GO:0031110	regulation of microtubule polymerization or depolymerization	3	0.993377	CTTNBP2, MACF1, APC
GO:0007064	mitotic sister chromatid cohesion	2	0.662252	NIPBL, SMC1A
GO:0034968	histone lysine methylation	2	0.662252	SETD2, RNF20

## Sheet: table S7
Table S7. GO analysis of upregulated genes in the wool follicle bulb during middle anagen-catagen transformation.
ID	Term	Count	%	Genes
GO:0007398	ectoderm development	10	7.35294	KRT9, PPARD, KRT17, FLOT2, CRABP2, COL3A1, FOXE1, VAX2, CSTA, CALML5
GO:0010605	negative regulation of macromolecule metabolic process	10	7.35294	BAK1, PPARD, HNF4A, CCDC85B, S100A11, ADRA1B, CST3, FOXE1, VAX2, PKIA
GO:0008544	epidermis development	9	6.61765	KRT9, PPARD, KRT17, FLOT2, CRABP2, COL3A1, FOXE1, CSTA, CALML5
GO:0016044	membrane organization	8	5.88235	BAK1, HRAS, ARC, STON1, DYSF, SEC24D, FTH1, SERP1
GO:0007010	cytoskeleton organization	7	5.14706	KRT9, HRAS, PRR5, KRT19, SAC3D1, FSCN1, TMSB10
GO:0052547	regulation of peptidase activity	6	4.41176	SIVA1, BAK1, MGMT, CST3, CSTB, CSTA
GO:0040007	growth	6	4.41176	PPARD, ADRA1B, ETNK2, BMP7, CSRP2, VAT1
GO:0032535	regulation of cellular component size	6	4.41176	HNF4A, CCDC85B, ADRA1B, TMSB10, CSRP2, VAT1
GO:0044092	negative regulation of molecular function	6	4.41176	SIVA1, HNF4A, CST3, CSTB, CSTA, PKIA
GO:0051336	regulation of hydrolase activity	6	4.41176	SIVA1, BAK1, MGMT, CST3, CSTB, CSTA
GO:0042692	muscle cell differentiation	5	3.67647	HRAS, KRT19, TNC, LGALS1, CSRP2
GO:0016053	organic acid biosynthetic process	5	3.67647	PYCRL, PTGES2, MLYCD, DEGS2, CBS
GO:0046394	carboxylic acid biosynthetic process	5	3.67647	PYCRL, PTGES2, MLYCD, DEGS2, CBS
GO:0009314	response to radiation	5	3.67647	BAK1, PITPNM1, HRAS, COL3A1, ADRA1B
GO:0008361	regulation of cell size	5	3.67647	HNF4A, CCDC85B, ADRA1B, CSRP2, VAT1
GO:0030036	actin cytoskeleton organization	5	3.67647	HRAS, PRR5, KRT19, FSCN1, TMSB10
GO:0030029	actin filament-based process	5	3.67647	HRAS, PRR5, KRT19, FSCN1, TMSB10
GO:0042445	hormone metabolic process	4	2.94118	CRABP2, FOXE1, PCSK7, BCO2
GO:0048193	Golgi vesicle transport	4	2.94118	PACS1, OSBPL5, SEC24D, FTH1
GO:0010817	regulation of hormone levels	4	2.94118	CRABP2, FOXE1, PCSK7, BCO2
GO:0010466	negative regulation of peptidase activity	3	2.20588	CST3, CSTB, CSTA
GO:0006776	vitamin A metabolic process	3	2.20588	PPARD, CRABP2, BCO2
GO:0006775	fat-soluble vitamin metabolic process	3	2.20588	PPARD, CRABP2, BCO2
GO:0048168	regulation of neuronal synaptic plasticity	3	2.20588	HRAS, ARC, SYNGR1
GO:0006720	isoprenoid metabolic process	3	2.20588	PPARD, CRABP2, BCO2
GO:0051346	negative regulation of hydrolase activity	3	2.20588	CST3, CSTB, CSTA
GO:0007612	learning	3	2.20588	HRAS, CHST10, ADRA1B
GO:0031329	regulation of cellular catabolic process	3	2.20588	MLYCD, ADRA1B, CST3
GO:0016049	cell growth	3	2.20588	ADRA1B, CSRP2, VAT1
GO:0048167	regulation of synaptic plasticity	3	2.20588	HRAS, ARC, SYNGR1
GO:0048592	eye morphogenesis	3	2.20588	BAK1, VAX2, BMP7
GO:0009791	post-embryonic development	3	2.20588	BAK1, ETNK2, SERP1
GO:0006766	vitamin metabolic process	3	2.20588	PPARD, CRABP2, BCO2
GO:0006633	fatty acid biosynthetic process	3	2.20588	PTGES2, MLYCD, DEGS2
GO:0043281	regulation of caspase activity	3	2.20588	SIVA1, BAK1, MGMT
GO:0043206	fibril organization	2	1.47059	COL3A1, CST3
GO:0008635	activation of caspase activity by cytochrome c	2	1.47059	SIVA1, BAK1
GO:0070227	lymphocyte apoptosis	2	1.47059	SIVA1, BAK1
GO:0048048	embryonic eye morphogenesis	2	1.47059	VAX2, BMP7
GO:0042573	retinoic acid metabolic process	2	1.47059	CRABP2, BCO2

## Sheet: table S8
Table S8. Pathway analysis of differently expressed genes in the wool follicle bulb during middle anagen-catagen transformation.
ID	Term	Count	Genes
hsa03040	Spliceosome	11	SF3B1, TCERG1, DDX46, CRNKL1, HSPA6, CDC5L, THOC2, PRPF38B, RBM25, PRPF40A, THOC1
hsa04510	Focal adhesion	10	HRAS, ARHGAP5, ROCK1, BRAF, ROCK2, TNC, MAPK3, COL3A1, PPP1R12A, PIK3R1
hsa04810	Regulation of actin cytoskeleton	9	HRAS, ROCK1, BRAF, ROCK2, MAPK3, PIKFYVE, PPP1R12A, PIK3R1, APC
hsa05200	Pathways in cancer	9	HRAS, PPARD, HSP90B1, HSP90AA1, BRAF, MAPK3, TPR, PIK3R1, APC
hsa04270	Vascular smooth muscle contraction	7	ROCK1, BRAF, ROCK2, MAPK3, ADRA1B, PPP1R12A, CALML5
hsa04360	Axon guidance	7	HRAS, ROCK1, ROCK2, PLXNA2, MAPK3, NFAT5, SEMA3D
hsa04910	Insulin signaling pathway	7	HRAS, BRAF, FLOT2, MAPK3, RPS6KB2, CALML5, PIK3R1
hsa04144	Endocytosis	7	HRAS, RAB11FIP2, USP8, RABEP1, PIKFYVE, HSPA6, EEA1
hsa04062	Chemokine signaling pathway	7	HRAS, ROCK1, BRAF, ROCK2, MAPK3, JAK2, PIK3R1
hsa05221	Acute myeloid leukemia	6	HRAS, PPARD, BRAF, MAPK3, RPS6KB2, PIK3R1
hsa04012	ErbB signaling pathway	6	HRAS, BRAF, MAPK3, GAB1, RPS6KB2, PIK3R1
hsa05215	Prostate cancer	6	HRAS, HSP90B1, HSP90AA1, BRAF, MAPK3, PIK3R1
hsa04722	Neurotrophin signaling pathway	6	HRAS, BRAF, MAPK3, GAB1, CALML5, PIK3R1
hsa04010	MAPK signaling pathway	6	HRAS, ZAK, BRAF, TAOK1, MAPK3, HSPA6
hsa05213	Endometrial cancer	5	HRAS, BRAF, MAPK3, PIK3R1, APC
hsa05214	Glioma	5	HRAS, BRAF, MAPK3, CALML5, PIK3R1
hsa04720	Long-term potentiation	5	HRAS, BRAF, MAPK3, PPP1R12A, CALML5
hsa05211	Renal cell carcinoma	5	HRAS, BRAF, MAPK3, GAB1, PIK3R1
hsa04370	VEGF signaling pathway	5	HRAS, MAPK3, NFAT5, NOS3, PIK3R1
hsa04662	B cell receptor signaling pathway	5	HRAS, MAPK3, NFAT5, MALT1, PIK3R1
hsa05220	Chronic myeloid leukemia	5	HRAS, GAB2, BRAF, MAPK3, PIK3R1
hsa04350	TGF-beta signaling pathway	5	ROCK1, ROCK2, MAPK3, RPS6KB2, BMP7
hsa04666	Fc gamma R-mediated phagocytosis	5	GAB2, MAPK3, PIKFYVE, RPS6KB2, PIK3R1
hsa04660	T cell receptor signaling pathway	5	HRAS, MAPK3, NFAT5, MALT1, PIK3R1
hsa04114	Oocyte meiosis	5	SLK, MAPK3, CALML5, SMC1A, SMC3
hsa04650	Natural killer cell mediated cytotoxicity	5	HRAS, BRAF, MAPK3, NFAT5, PIK3R1
hsa04310	Wnt signaling pathway	5	PPARD, ROCK1, ROCK2, NFAT5, APC
hsa05216	Thyroid cancer	4	HRAS, BRAF, MAPK3, TPR
hsa00310	Lysine degradation	4	ASH1L, AASS, SETD2, SUV420H1
hsa04150	mTOR signaling pathway	4	BRAF, MAPK3, RPS6KB2, PIK3R1
hsa05223	Non-small cell lung cancer	4	HRAS, BRAF, MAPK3, PIK3R1
hsa04621	NOD-like receptor signaling pathway	4	HSP90B1, HSP90AA1, ERBB2IP, MAPK3
hsa05218	Melanoma	4	HRAS, BRAF, MAPK3, PIK3R1
hsa04070	Phosphatidylinositol signaling system	4	PIKFYVE, DGKZ, CALML5, PIK3R1
hsa04664	Fc epsilon RI signaling pathway	4	HRAS, GAB2, MAPK3, PIK3R1
hsa05210	Colorectal cancer	4	BRAF, MAPK3, PIK3R1, APC
hsa04914	Progesterone-mediated oocyte maturation	4	HSP90AA1, BRAF, MAPK3, PIK3R1
hsa04670	Leukocyte transendothelial migration	4	ARHGAP5, ROCK1, ROCK2, PIK3R1
hsa04530	Tight junction	4	HRAS, INADL, ZAK, ASH1L
hsa00230	Purine metabolism	4	XDH, ADSSL1, NUDT9, POLR2A
hsa05219	Bladder cancer	3	HRAS, BRAF, MAPK3
hsa05130	Pathogenic Escherichia coli infection	3	ROCK1, ROCK2, NCL
hsa00564	Glycerophospholipid metabolism	3	DGKZ, ETNK1, ETNK2
hsa04730	Long-term depression	3	HRAS, BRAF, MAPK3
hsa05212	Pancreatic cancer	3	BRAF, MAPK3, PIK3R1
hsa04912	GnRH signaling pathway	3	HRAS, MAPK3, CALML5
hsa04916	Melanogenesis	3	HRAS, MAPK3, CALML5
hsa04110	Cell cycle	3	PRKDC, SMC1A, SMC3
hsa04630	Jak-STAT signaling pathway	3	SPRY1, JAK2, PIK3R1
hsa05010	Alzheimer's disease	3	MAPK3, CALML5, CAPN1
hsa04020	Calcium signaling pathway	3	ADRA1B, NOS3, CALML5
hsa04080	Neuroactive ligand-receptor interaction	3	S1PR3, GABRE, ADRA1B
hsa04060	Cytokine-cytokine receptor interaction	3	TNFRSF6B, BMP7, IL17RA
hsa03450	Non-homologous end-joining	2	PRKDC, RAD50
hsa00250	Alanine, aspartate and glutamate metabolism	2	ADSSL1, GFPT1
hsa00860	Porphyrin and chlorophyll metabolism	2	EPRS, FTH1
hsa03022	Basal transcription factors	2	STON1, GTF2H2
hsa04960	Aldosterone-regulated sodium reabsorption	2	MAPK3, PIK3R1
hsa00520	Amino sugar and nucleotide sugar metabolism	2	AMDHD2, GFPT1
hsa03420	Nucleotide excision repair	2	RFC1, GTF2H2
hsa04930	Type II diabetes mellitus	2	MAPK3, PIK3R1
hsa00480	Glutathione metabolism	2	ANPEP, MGST1
hsa00330	Arginine and proline metabolism	2	PYCRL, NOS3
hsa03018	RNA degradation	2	TTC37, XRN1
hsa04612	Antigen processing and presentation	2	HSP90AA1, HSPA6
hsa04512	ECM-receptor interaction	2	TNC, COL3A1
hsa04210	Apoptosis	2	PIK3R1, CAPN1
hsa04540	Gap junction	2	HRAS, MAPK3
hsa04620	Toll-like receptor signaling pathway	2	MAPK3, PIK3R1
hsa00190	Oxidative phosphorylation	2	ATP12A, LHPP
hsa04120	Ubiquitin mediated proteolysis	2	CUL5, BIRC6
hsa03410	Base excision repair	1	PARP4
hsa00970	Aminoacyl-tRNA biosynthesis	1	EPRS
hsa04610	Complement and coagulation cascades	1	MASP2
hsa00980	Metabolism of xenobiotics by cytochrome P450	1	MGST1
hsa03320	PPAR signaling pathway	1	PPARD
hsa00562	Inositol phosphate metabolism	1	PIKFYVE
hsa05217	Basal cell carcinoma	1	APC
hsa04622	RIG-I-like receptor signaling pathway	1	TANK
hsa00983	Drug metabolism	1	XDH
hsa00051	Fructose and mannose metabolism	1	PFKL
hsa00410	beta-Alanine metabolism	1	MLYCD
hsa05016	Huntington's disease	1	POLR2A
hsa04340	Hedgehog signaling pathway	1	BMP7
hsa04130	SNARE interactions in vesicular transport	1	BNIP1
hsa00982	Drug metabolism	1	MGST1
hsa00300	Lysine biosynthesis	1	AASS
hsa00450	Selenoamino acid metabolism	1	CBS
hsa05222	Small cell lung cancer	1	PIK3R1
hsa00590	Arachidonic acid metabolism	1	PTGES2
hsa00600	Sphingolipid metabolism	1	DEGS2
hsa04740	Olfactory transduction	1	CALML5
hsa00604	Glycosphingolipid biosynthesis	1	ST6GALNAC6
hsa05322	Systemic lupus erythematosus	1	SSB
hsa00561	Glycerolipid metabolism	1	DGKZ
hsa00280	Valine, leucine and isoleucine degradation	1	MCCC2
hsa00240	Pyrimidine metabolism	1	POLR2A
hsa04920	Adipocytokine signaling pathway	1	JAK2
hsa05020	Prion diseases	1	MAPK3
hsa00030	Pentose phosphate pathway	1	PFKL
hsa04640	Hematopoietic cell lineage	1	ANPEP
hsa00260	Glycine, serine and threonine metabolism	1	CBS
hsa00640	Propanoate metabolism	1	MLYCD
hsa04520	Adherens junction	1	MAPK3
hsa04514	Cell adhesion molecules (CAMs)	1	ALCAM
hsa00232	Caffeine metabolism	1	XDH
hsa03440	Homologous recombination	1	RAD50
hsa02010	ABC transporters	1	ABCC5
hsa04614	Renin-angiotensin system	1	ANPEP
hsa04950	Maturity onset diabetes of the young	1	HNF4A
hsa03030	DNA replication	1	RFC1
hsa05416	Viral myocarditis	1	EIF4G3
hsa03430	Mismatch repair	1	RFC1
hsa03020	RNA polymerase	1	POLR2A
hsa00270	Cysteine and methionine metabolism	1	CBS
hsa00512	O-Glycan biosynthesis	1	OGT
hsa04320	Dorso-ventral axis formation	1	MAPK3
hsa03010	Ribosome	1	RPS2
hsa00052	Galactose metabolism	1	PFKL
hsa00010	Glycolysis / Gluconeogenesis	1	PFKL
hsa00532	Chondroitin sulfate biosynthesis	1	CHPF

## Sheet: table S9
Table S9. GO analysis of upregulated genes in the wool follicle bulb during catagen-late telogen/early anagen transformation.
ID	Term	Count	%	Genes
GO:0045449	regulation of transcription	35	20.7101	CAMTA1, ZNF292, RSF1, ARID4A, BDP1, TMF1, PNN, CHD9, MLL5, TCERG1, CIR1, BCL11A, NFAT5, PSIP1, BAZ2B, USP16, GABPB2, MYSM1, ZNF605, PTPRK, ZNF260, CENPF, TEAD1, RB1, TOPORS, GTF2H2, ATRX, SLTM, BRWD1, BAZ1A, HIF1A, RFC1, BPTF, ASH1L, JAK2
GO:0006350	transcription	33	19.5266	CAMTA1, ZNF292, RSF1, ARID4A, BDP1, TMF1, PNN, CHD9, MLL5, TCERG1, CIR1, BCL11A, NFAT5, PSIP1, BAZ2B, USP16, TRIP11, GABPB2, MYSM1, ZNF605, ZNF260, TEAD1, RB1, TOPORS, GTF2H2, SLTM, BRWD1, PHF3, BAZ1A, HIF1A, RFC1, BPTF, ASH1L
GO:0007049	cell cycle	17	10.0592	CKAP5, USP9X, LRRCC1, CENPF, RB1, CD2AP, SMC3, RAD50, SMC4, MLL5, NIPBL, PKD2, CLIP1, USP16, DNAJC2, MPHOSPH8, MYH10
GO:0051276	chromosome organization	16	9.46746	RSF1, ARID4A, CENPF, RB1, SMC3, RAD50, SMC4, CHD9, MLL5, NIPBL, RFC1, BPTF, ASH1L, USP16, MPHOSPH8, MYSM1
GO:0022402	cell cycle process	16	9.46746	CKAP5, USP9X, LRRCC1, CENPF, RB1, CD2AP, SMC3, RAD50, SMC4, MLL5, NIPBL, PKD2, CLIP1, USP16, DNAJC2, MYH10
GO:0006259	DNA metabolic process	15	8.87574	CENPF, GTF2H2, SMC3, RAD50, SETX, ATRX, RECQL, TOP1, MLL5, SLK, RFC1, PSIP1, PARP4, DNAJC2, REV3L
GO:0033554	cellular response to stress	15	8.87574	PTPRK, TOPORS, RAD50, GTF2H2, SMC3, SETX, ATRX, RECQL, HIF1A, SLK, RFC1, BBC3, JAK2, PARP4, REV3L
GO:0007155	cell adhesion	14	8.28402	CLDN8, PTPRK, ROCK1, CLDN3, TRPM7, IGFALS, LMO7, CD2AP, PNN, ARHGAP5, DSG2, PKD2, DSC1, FNDC3A
GO:0022610	biological adhesion	14	8.28402	CLDN8, PTPRK, ROCK1, CLDN3, TRPM7, IGFALS, LMO7, CD2AP, PNN, ARHGAP5, DSG2, PKD2, DSC1, FNDC3A
GO:0051301	cell division	13	7.69231	ROCK1, ROCK2, CKAP5, USP9X, LRRCC1, CENPF, RB1, CD2AP, SMC3, SMC4, TOP1, USP16, MYH10
GO:0022403	cell cycle phase	13	7.69231	CKAP5, USP9X, LRRCC1, CENPF, RB1, CD2AP, SMC3, RAD50, SMC4, NIPBL, CLIP1, USP16, DNAJC2
GO:0006396	RNA processing	13	7.69231	SRPK2, SSB, ZNF638, PNN, SETX, ADAT1, CIR1, DDX46, PPIG, LUC7L3, RBM25, PRPF38B, PRPF40A
GO:0000279	M phase	12	7.10059	NIPBL, CKAP5, USP9X, LRRCC1, CENPF, CLIP1, RB1, USP16, CD2AP, SMC3, RAD50, SMC4
GO:0000278	mitotic cell cycle	12	7.10059	NIPBL, CKAP5, USP9X, LRRCC1, CENPF, CLIP1, RB1, USP16, DNAJC2, CD2AP, SMC3, SMC4
GO:0006974	response to DNA damage stimulus	12	7.10059	ATRX, RECQL, RFC1, SLK, BBC3, TOPORS, PARP4, SMC3, RAD50, GTF2H2, SETX, REV3L
GO:0051173	positive regulation of nitrogen compound metabolic process	12	7.10059	MLL5, HIF1A, RSF1, BPTF, NFAT5, TEAD1, JAK2, RB1, TOPORS, USP16, MYSM1, TNKS2
GO:0031328	positive regulation of cellular biosynthetic process	12	7.10059	MLL5, HIF1A, RSF1, BPTF, NFAT5, TEAD1, JAK2, RB1, TOPORS, USP16, MYSM1, TNKS2
GO:0007010	cytoskeleton organization	11	6.50888	TCHH, ROCK1, SPTBN5, ROCK2, TRPM7, CKAP5, CALD1, LMO7, PCM1, SMC3, MYH10
GO:0000280	nuclear division	10	5.91716	NIPBL, CKAP5, USP9X, LRRCC1, CENPF, CLIP1, USP16, CD2AP, SMC3, SMC4
GO:0007067	mitosis	10	5.91716	NIPBL, CKAP5, USP9X, LRRCC1, CENPF, CLIP1, USP16, CD2AP, SMC3, SMC4
GO:0000087	M phase of mitotic cell cycle	10	5.91716	NIPBL, CKAP5, USP9X, LRRCC1, CENPF, CLIP1, USP16, CD2AP, SMC3, SMC4
GO:0048285	organelle fission	10	5.91716	NIPBL, CKAP5, USP9X, LRRCC1, CENPF, CLIP1, USP16, CD2AP, SMC3, SMC4
GO:0006281	DNA repair	10	5.91716	ATRX, RECQL, RFC1, SLK, PARP4, SMC3, RAD50, GTF2H2, SETX, REV3L
GO:0008380	RNA splicing	10	5.91716	SRPK2, DDX46, CIR1, PPIG, ZNF638, PRPF38B, RBM25, LUC7L3, PRPF40A, PNN
GO:0016071	mRNA metabolic process	10	5.91716	SRPK2, UPF2, DDX46, CIR1, SSB, PRPF38B, RBM25, LUC7L3, PRPF40A, PNN
GO:0006325	chromatin organization	10	5.91716	CHD9, MLL5, RSF1, ARID4A, BPTF, ASH1L, RB1, USP16, MPHOSPH8, MYSM1
GO:0006351	transcription, DNA-dependent	9	5.32544	TCERG1, HIF1A, RSF1, ARID4A, ASH1L, NFAT5, TRIP11, GTF2H2, TMF1
GO:0032774	RNA biosynthetic process	9	5.32544	TCERG1, HIF1A, RSF1, ARID4A, ASH1L, NFAT5, TRIP11, GTF2H2, TMF1
GO:0006366	transcription from RNA polymerase II promoter	8	4.73373	TCERG1, HIF1A, ARID4A, ASH1L, NFAT5, TRIP11, GTF2H2, TMF1
GO:0016568	chromatin modification	8	4.73373	CHD9, MLL5, RSF1, BPTF, ASH1L, RB1, USP16, MYSM1
GO:0016337	cell-cell adhesion	8	4.73373	CLDN8, DSG2, ROCK1, CLDN3, LMO7, DSC1, CD2AP, FNDC3A
GO:0006397	mRNA processing	8	4.73373	SRPK2, DDX46, CIR1, PRPF38B, RBM25, LUC7L3, PRPF40A, PNN
GO:0033043	regulation of organelle organization	7	4.14201	NEB, SPTBN5, ROCK2, CENPF, NEXN, TPR, TNKS2
GO:0030036	actin cytoskeleton organization	7	4.14201	ROCK1, SPTBN5, ROCK2, TRPM7, CALD1, LMO7, MYH10
GO:0030029	actin filament-based process	7	4.14201	ROCK1, SPTBN5, ROCK2, TRPM7, CALD1, LMO7, MYH10
GO:0007017	microtubule-based process	7	4.14201	KIF3A, KIF5B, CKAP5, KTN1, PCM1, KIF21A, SMC3
GO:0030334	regulation of cell migration	6	3.5503	PTPRK, MIA3, HIF1A, ARHGAP5, JAK2, NEXN
GO:0006260	DNA replication	6	3.5503	TOP1, RFC1, CENPF, DNAJC2, RAD50, REV3L
GO:0040012	regulation of locomotion	6	3.5503	PTPRK, MIA3, HIF1A, ARHGAP5, JAK2, NEXN
GO:0051270	regulation of cell motion	6	3.5503	PTPRK, MIA3, HIF1A, ARHGAP5, JAK2, NEXN
GO:0007059	chromosome segregation	5	2.95858	NIPBL, USP9X, CENPF, SMC3, SMC4
GO:0030031	cell projection assembly	5	2.95858	KIF3A, ROCK1, PCM1, CD2AP, MYH10
GO:0009913	epidermal cell differentiation	4	2.36686	TCHH, SPINK5, IVL, SCEL
GO:0045786	negative regulation of cell cycle	4	2.36686	PTPRK, CENPF, RB1, TPR
GO:0051146	striated muscle cell differentiation	4	2.36686	UTRN, CACNB2, RB1, MYH10
GO:0030335	positive regulation of cell migration	4	2.36686	MIA3, HIF1A, ARHGAP5, JAK2
GO:0051236	establishment of RNA localization	4	2.36686	ATXN2, UPF2, CKAP5, TPR
GO:0050657	nucleic acid transport	4	2.36686	ATXN2, UPF2, CKAP5, TPR
GO:0050658	RNA transport	4	2.36686	ATXN2, UPF2, CKAP5, TPR
GO:0051272	positive regulation of cell motion	4	2.36686	MIA3, HIF1A, ARHGAP5, JAK2
GO:0040017	positive regulation of locomotion	4	2.36686	MIA3, HIF1A, ARHGAP5, JAK2
GO:0006403	RNA localization	4	2.36686	ATXN2, UPF2, CKAP5, TPR
GO:0006310	DNA recombination	4	2.36686	ATRX, RECQL, PSIP1, RAD50
GO:0010948	negative regulation of cell cycle process	3	1.77515	CENPF, RB1, TPR
GO:0016579	protein deubiquitination	3	1.77515	USP9X, USP16, MYSM1
GO:0031032	actomyosin structure organization	3	1.77515	TRPM7, LMO7, MYH10
GO:0070646	protein modification by small protein removal	3	1.77515	USP9X, USP16, MYSM1
GO:0000910	cytokinesis	3	1.77515	ROCK1, ROCK2, MYH10
GO:0006564	L-serine biosynthetic process	2	1.18343	PSAT1, PSPH
GO:0006930	substrate-bound cell migration, cell extension	2	1.18343	CD2AP, MYH10
GO:0000085	G2 phase of mitotic cell cycle	2	1.18343	CENPF, DNAJC2
GO:0051319	G2 phase	2	1.18343	CENPF, DNAJC2
GO:0006563	L-serine metabolic process	2	1.18343	PSAT1, PSPH

## Sheet: table S10
Table S10. GO analysis of downregulated genes in the wool follicle bulb during catagen-late telogen/early anagen transformation.
ID	Term	Count	%	Genes
GO:0006091	generation of precursor metabolites and energy	4	11.7647	LDHB, COX10, FADS2, GYG1
GO:0016310	phosphorylation	4	11.7647	COX10, MAPK8IP1, CD74, MYLK
GO:0006006	glucose metabolic process	3	8.82353	LDHB, GYG1, SERP1
GO:0019318	hexose metabolic process	3	8.82353	LDHB, GYG1, SERP1
GO:0005996	monosaccharide metabolic process	3	8.82353	LDHB, GYG1, SERP1
GO:0006412	translation	3	8.82353	RPL39, RPS21, MRP63
GO:0043066	negative regulation of apoptosis	3	8.82353	PEA15, MAPK8IP1, CD74
GO:0043069	negative regulation of programmed cell death	3	8.82353	PEA15, MAPK8IP1, CD74
GO:0060548	negative regulation of cell death	3	8.82353	PEA15, MAPK8IP1, CD74
GO:0006636	unsaturated fatty acid biosynthetic process	2	5.88235	FADS2, CD74
GO:0033559	unsaturated fatty acid metabolic process	2	5.88235	FADS2, CD74

[truncated: 5 more sheets: table S11, table S12, table S13, table S14, table S15]
